# Supplementary material for: Synthesis, 3D-pharmacophore modelling and 2D-QSAR study of new pyridine-3-carbonitriles as vasorelaxant active agents
Source: Royal Society of Chemistry journal article supplement (doi:10.1039/d0nj06319c), 2021-01-01
Supplement: d0nj06319c1.pdf [file d0nj06319c1.pdf]

## Supplementary material

### 1. Vasodilation Activity Screening (page 3)

#### Table titles:

**Table S1.** Dose response curves the tested compounds

**Table S2.** Descriptor values for the test set compounds presented in the 2D-QSAR model.

**Table S3.** Descriptor values for the training set compounds of the 2D-QSAR model.

#### Figure captions:

**Figure S1.** 3D-pharmacophore model mapped on the tested compounds **3a-v**.

**Figure S2.** <sup>1</sup>H-NMR spectrum of compound **3a**.

**Figure S3.** <sup>13</sup>C-NMR spectrum of compound **3a**.

**Figure S4.** Mass spectrum of compound **3a**.

**Figure S5.** <sup>1</sup>H NMR spectrum of compound **3b**.

**Figure S6.** <sup>13</sup>C NMR spectrum of compound **3b**.

**Figure S7.** Mass spectrum of compound **3b**.

**Figure S8.** <sup>1</sup>H NMR spectrum of compound **3c**.

**Figure S9.** <sup>13</sup>C NMR spectrum of compound **3c**.

**Figure S10.** Mass spectrum of compound **3c**.

**Figure S11.** <sup>1</sup>H NMR spectrum of compound **3d**.

**Figure S12.** <sup>13</sup>C NMR spectrum of compound **3d**.

**Figure S13.** Mass spectrum of compound **3d**.

**Figure S14.** <sup>1</sup>H NMR spectrum of compound **3e**.

**Figure S15.** Mass spectrum of compound **3e**.

**Figure S16.** <sup>1</sup>H NMR spectrum of compound **3f**.

**Figure S17.** Mass spectrum of compound **3f**.

**Figure S18.** <sup>1</sup>H NMR spectrum of compound **3g**.

**Figure S19.** <sup>13</sup>C NMR spectrum of compound **3g**.

**Figure S20.** Mass spectrum of compound **3g**.

**Figure S21.** <sup>1</sup>H NMR spectrum of compound **3h**.

**Figure S22.** <sup>13</sup>C NMR spectrum of compound **3h**.

**Figure S23.** Mass spectrum of compound **3h**.

**Figure S24.** <sup>1</sup>H NMR spectrum of compound **3i**.

**Figure S25.** <sup>13</sup>C NMR spectrum of compound **3i**.

**Figure S26.** Mass spectrum of compound **3i**.

**Figure S27.** <sup>1</sup>H NMR spectrum of compound **3j**.

**Figure S28.** <sup>13</sup>C NMR spectrum of compound **3j**.

**Figure S29.** Mass spectrum of compound **3j**.

**Figure S30.** <sup>1</sup>H NMR spectrum of compound **3k**.

**Figure S31.**  $^{13}\text{C}$  NMR spectrum of compound **3k**.  
**Figure S32.** Mass spectrum of compound **3k**.  
**Figure S33.**  $^1\text{H}$  NMR spectrum of compound **3l**.  
**Figure S34.**  $^{13}\text{C}$  NMR spectrum of compound **3l**.  
**Figure S35.** Mass spectrum of compound **3l**.  
**Figure S36.**  $^1\text{H}$  NMR spectrum of compound **3m**.  
**Figure S37.**  $^{13}\text{C}$  NMR spectrum of compound **3m**.  
**Figure S38.** Mass spectrum of compound **3m**.  
**Figure S39.**  $^1\text{H}$  NMR spectrum of compound **3n**.  
**Figure S40.**  $^{13}\text{C}$  NMR spectrum of compound **3n**.  
**Figure S41.** Mass spectrum of compound **3n**.  
**Figure S42.**  $^1\text{H}$  NMR spectrum of compound **3o**.  
**Figure S43.**  $^{13}\text{C}$  NMR spectrum of compound **3o**.  
**Figure S44.** Mass spectrum of compound **3o**.  
**Figure S45.**  $^1\text{H}$  NMR spectrum of compound **3p**.  
**Figure S46.**  $^{13}\text{C}$  NMR spectrum of compound **3p**.  
**Figure S47.** Mass spectrum of compound **3p**.  
**Figure S48.**  $^1\text{H}$  NMR spectrum of compound **3q**.  
**Figure S49.**  $^{13}\text{C}$  NMR spectrum of compound **3q**.  
**Figure S50.** Mass spectrum of compound **3q**.  
**Figure S51.**  $^1\text{H}$  NMR spectrum of compound **3r**.  
**Figure S52.**  $^{13}\text{C}$  NMR spectrum of compound **3r**.  
**Figure S53.** Mass spectrum of compound **3r**.  
**Figure S54.**  $^1\text{H}$  NMR spectrum of compound **3s**.  
**Figure S55.**  $^{13}\text{C}$  NMR spectrum of compound **3s**.  
**Figure S56.** Mass spectrum of compound **3s**.  
**Figure S57.**  $^1\text{H}$  NMR spectrum of compound **3t**.  
**Figure S58.**  $^{13}\text{C}$  NMR spectrum of compound **3t**.  
**Figure S59.** Mass spectrum of compound **3t**.  
**Figure S60.**  $^1\text{H}$  NMR spectrum of compound **3u**.  
**Figure S61.**  $^{13}\text{C}$  NMR spectrum of compound **3u**.  
**Figure S62.** Mass spectrum of compound **3u**.  
**Figure S63.**  $^1\text{H}$  NMR spectrum of compound **3v**.  
**Figure S64.**  $^{13}\text{C}$  NMR spectrum of compound **3v**.  
**Figure S65.** Mass spectrum of compound **3v**.

### ***1. Vasodilation Activity Screening***

The vasodilation activity screening was undertaken by Pharmacology Department, National Research Centre, Egypt, according to the standard in vitro bioassay technique [1, 2] by testing the effects of the synthesized agents **3a-v** and compared with prazosin hydrochloride ( $\alpha_1$ -AR antagonist) on isolated thoracic aortic rings of male Wistar rats (200–250 g) pre-contracted with norepinephrine hydrochloride. After light ether anesthesia, the rats were sacrificed by cervical dislocation. The aortae were immediately excised, freed of extraneous tissues, and prepared for isometric tension recording. Aorta was cut into (3–5 mm width) rings and each ring was placed in a vertical chamber “10 ml 5 jacketed automatic multi-chamber organ bath system (Model no. ML870B6/C, Panlab, Spain)” filled with Krebs solution composed of (in mM): NaCl, 118.0; KCl, 4.7; NaHCO<sub>3</sub>, 25.0; CaCl<sub>2</sub>, 1.8; NaH<sub>2</sub>PO<sub>4</sub>, 1.2; MgSO<sub>4</sub>, 1.2; glucose, 11.0 and oxygenated with carbogen gas (95% O<sub>2</sub>/5% CO<sub>2</sub>) at  $37 \pm 0.5$  °C. Each aortic ring was mounted between two stainless steel hooks passed through its lumen. The lower hook was fixed between two plates, while the upper one was attached to a force displacement transducer (Model no. MLT0201, Panlab, Spain) connected to an amplifier (PowerLab, AD Instruments Pty. Ltd.), which was connected to a computer. The Chart for windows (v 3.4) software was used to record and elaborate data. Preparations were stabilized under 2 g resting tension during 2 h, and then the contracture response to norepinephrine hydrochloride ( $10^{-6}$  M) was measured before and after exposure to increasing concentrations of the tested synthesized compounds (50, 100, 150, 200, 250, 300, 350, 400, 450 and 500  $\mu$ M). The tested compounds were dissolved in dimethylsulfoxide (DMSO) as stock solution (10 ml of 0.005 M). Control experiments were performed in the presence of DMSO alone, at the same concentrations as those used with the derivatives tested, which demonstrated that the solvent did not affect the contractile response of isolated aorta. The observed vasodilation activity screening data for the synthesized compounds **3a-v** and prazosin hydrochloride are expressed as IC<sub>50</sub> ( $\mu$ M) concentration necessary for 50% reduction of maximal norepinephrine hydrochloride induced contracture utilizing four different replicates. The standard deviation  $\pm$ SD was calculated by SPSS-16.

**Table S1. Dose response curves the tested compounds**

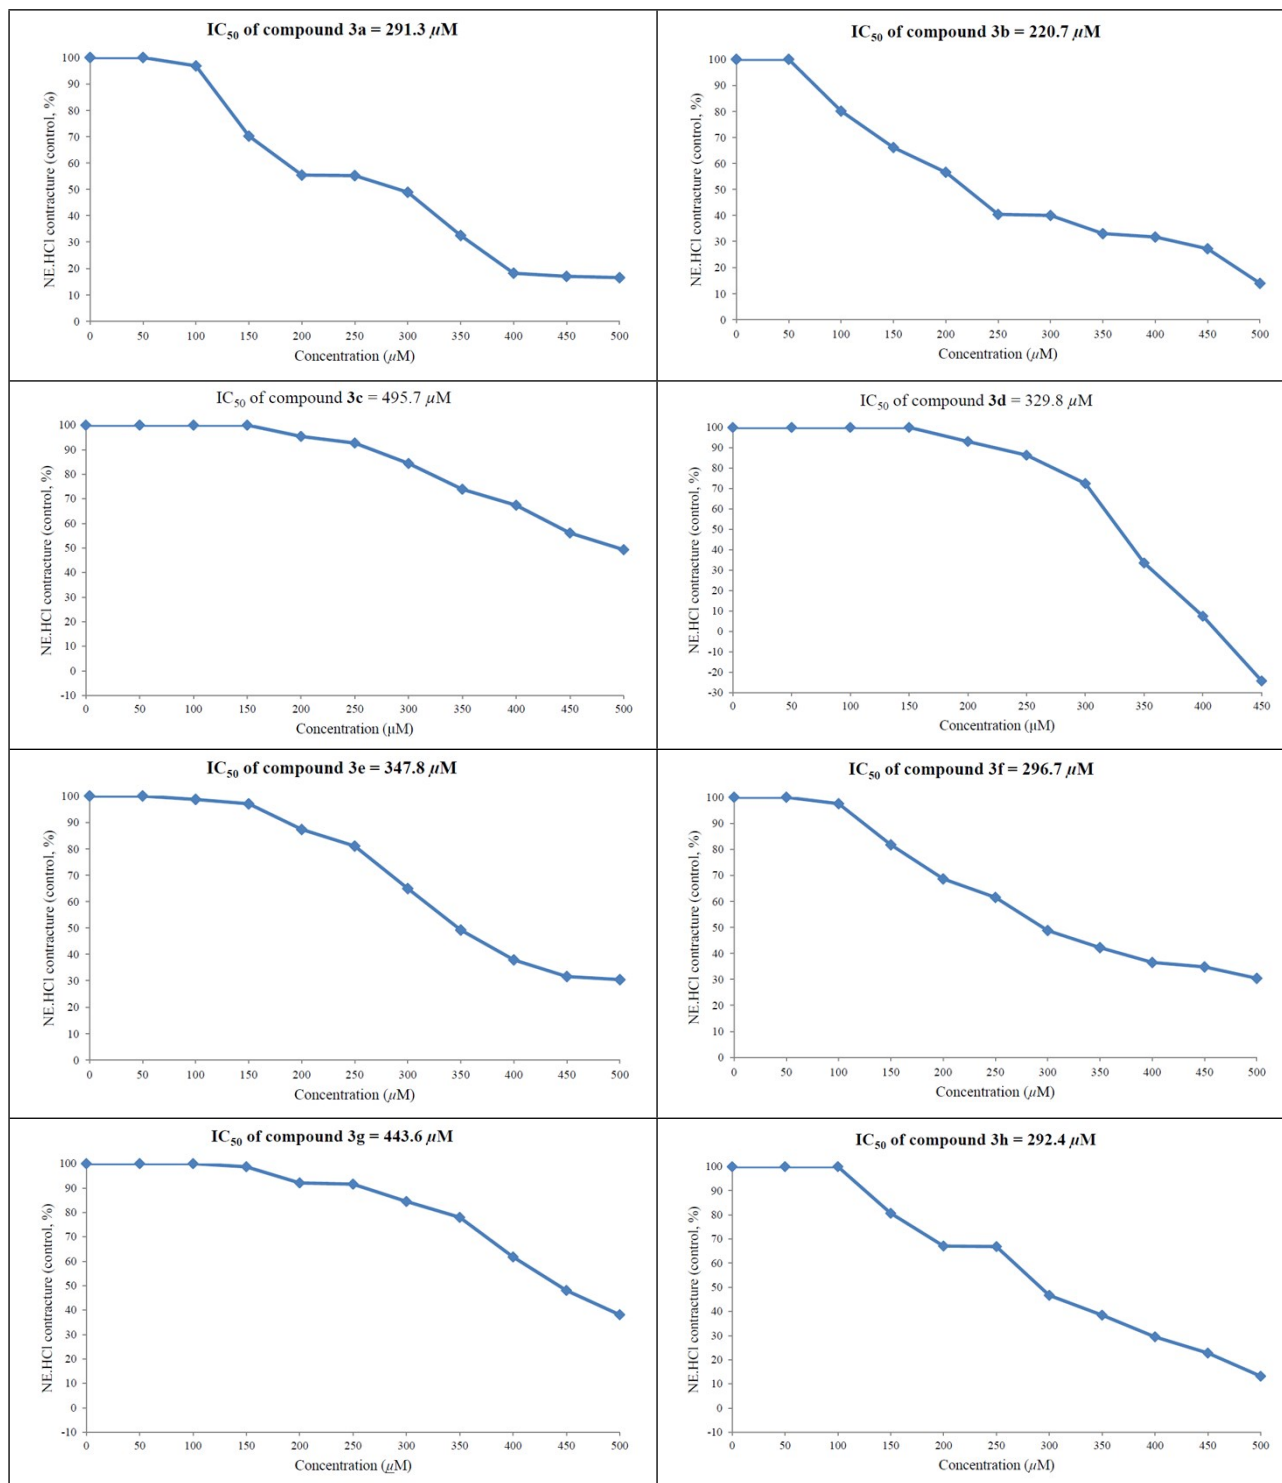

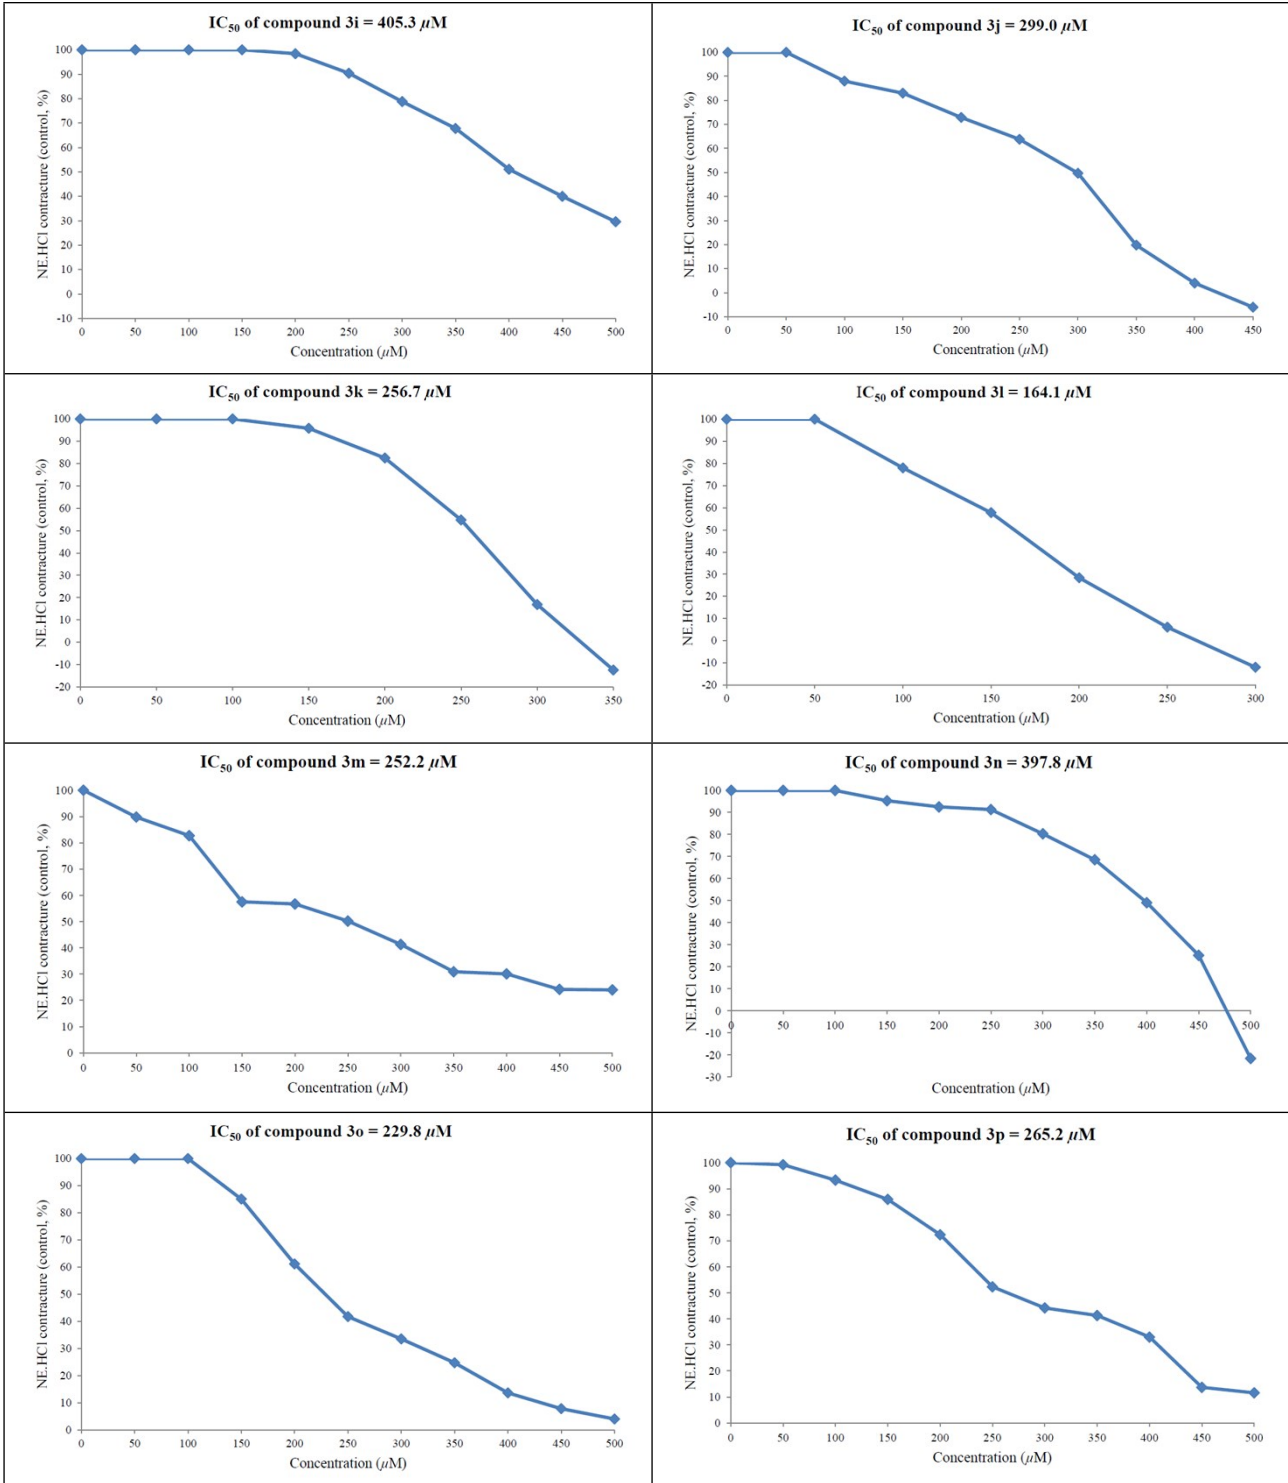

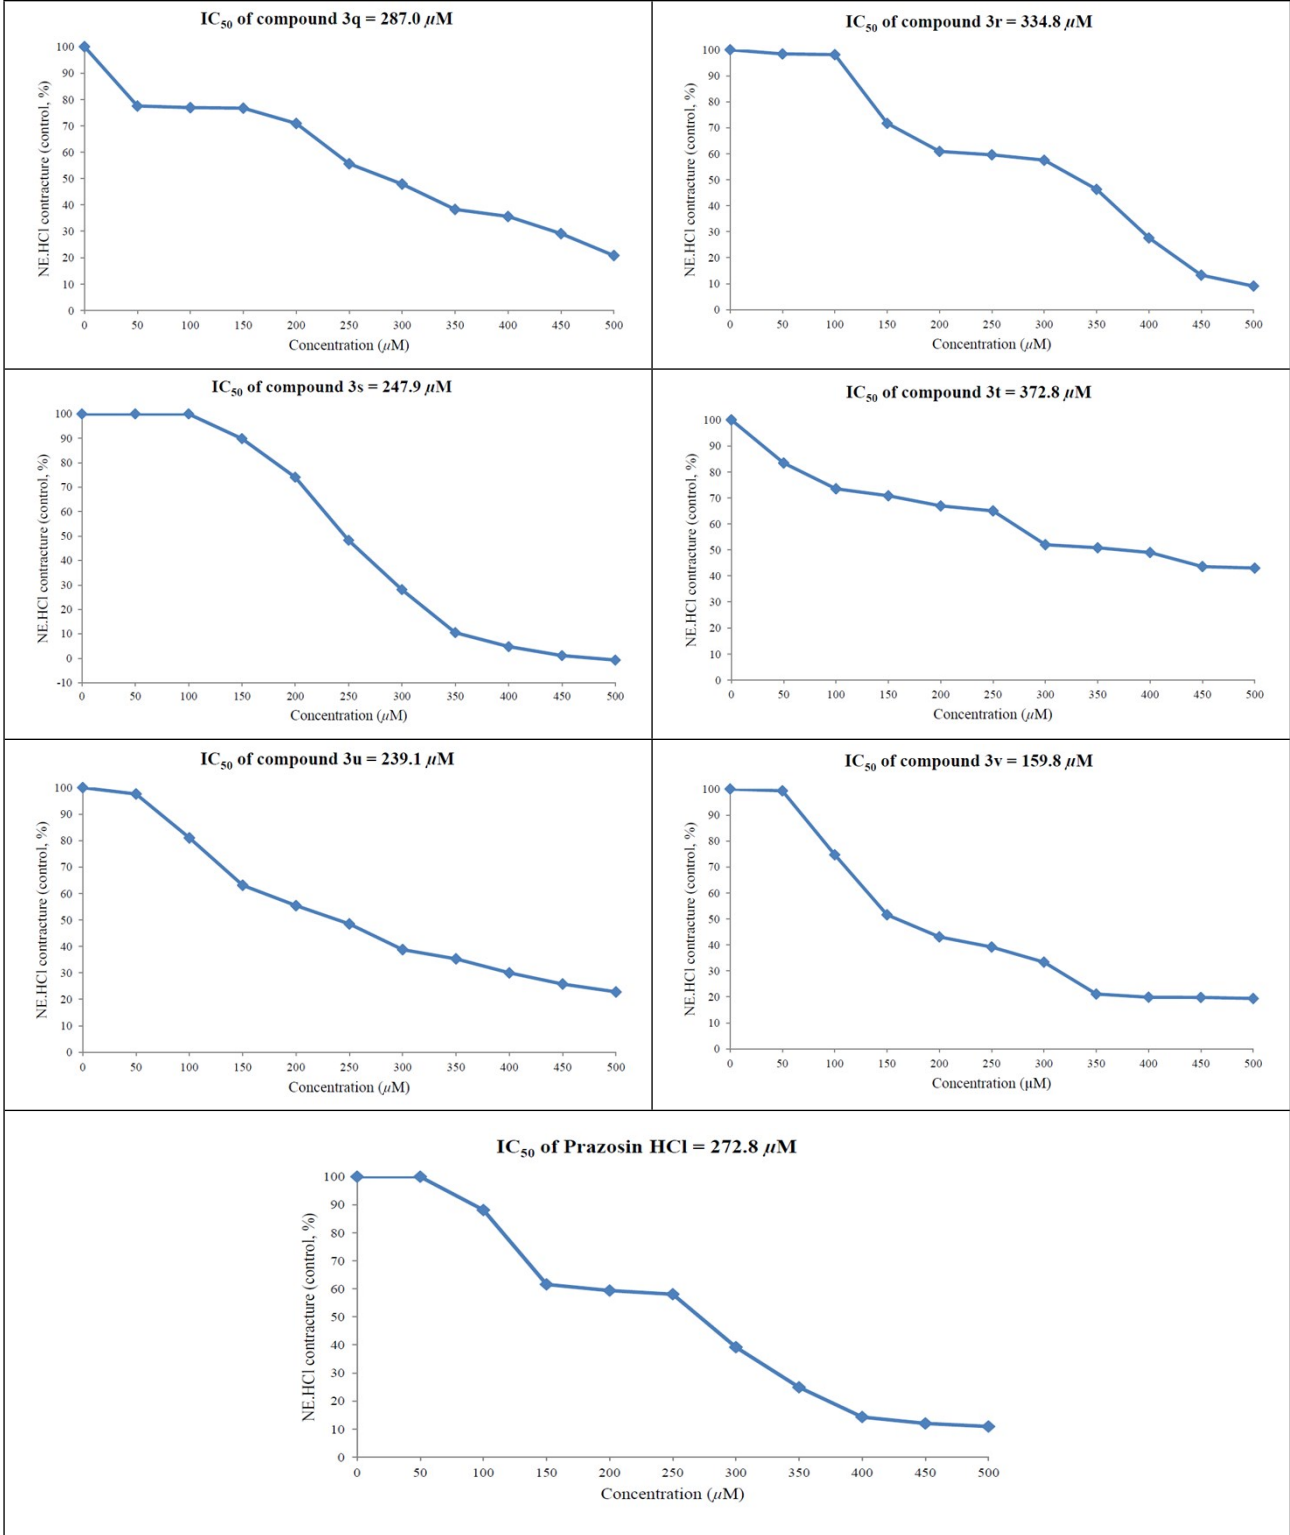

**Table S2.** Descriptor values for the test set compounds presented in the 2D-QSAR model.

| Entry | Compd.    | $D_1$   | $D_2$   | $D_3$  | $D_4$   |
|-------|-----------|---------|---------|--------|---------|
| 1     | <b>3k</b> | 66.044  | 22445.4 | 2.1229 | 0.2     |
| 2     | <b>3r</b> | 65.9747 | 26751.7 | 2.0958 | 0.12766 |

$D_1$  = Min. e-n attraction for bond H-C;  $D_2$  = (1/6)X GAMMA polarizability (DIP);  $D_3$  = Max. bonding contribution of one MO;  $D_4$  = Relative number of double bonds.

**Table S3.** Descriptor values for the training set compounds of the 2D-QSAR model.

| Entry | Compd.    | $D_1$   | $D_2$   | $D_3$  | $D_4$   |
|-------|-----------|---------|---------|--------|---------|
| 1     | <b>3a</b> | 66.0758 | 20365.2 | 2.1136 | 0.13158 |
| 2     | <b>3b</b> | 67.1792 | 18536   | 2.0439 | 0.14286 |
| 3     | <b>3c</b> | 66.0375 | 19204.3 | 2.0547 | 0.14286 |
| 4     | <b>3d</b> | 67.086  | 16035.6 | 2.0221 | 0.14286 |
| 5     | <b>3e</b> | 65.9986 | 17108.5 | 2.1324 | 0.14286 |
| 6     | <b>3f</b> | 66.9087 | 18526.4 | 2.0224 | 0.14286 |
| 7     | <b>3g</b> | 66.045  | 19210   | 2.0754 | 0.12821 |
| 8     | <b>3h</b> | 66.8966 | 16714.5 | 2.0767 | 0.12821 |
| 9     | <b>3i</b> | 66.1015 | 18964.7 | 2.1307 | 0.11628 |
| 10    | <b>3j</b> | 67.1195 | 18322.7 | 2.0076 | 0.11628 |
| 11    | <b>3l</b> | 67.1802 | 23410.2 | 2.0066 | 0.2     |
| 12    | <b>3m</b> | 65.9366 | 23006.2 | 2.1408 | 0.15    |
| 13    | <b>3n</b> | 65.944  | 20737.5 | 2.1076 | 0.15    |
| 14    | <b>3o</b> | 66.474  | 26095.8 | 2.0839 | 0.13636 |
| 15    | <b>3p</b> | 66.1563 | 21913.8 | 2.0955 | 0.13953 |
| 16    | <b>3q</b> | 65.9516 | 23030.5 | 2.0877 | 0.13953 |
| 17    | <b>3s</b> | 65.9536 | 25348.6 | 2.1397 | 0.13043 |
| 18    | <b>3t</b> | 65.9763 | 23867   | 2.0729 | 0.13043 |
| 19    | <b>3u</b> | 66.0608 | 25428.7 | 2.1421 | 0.11905 |
| 20    | <b>3v</b> | 66.9048 | 26261.6 | 2.1267 | 0.11905 |

$D_1$  = Min. e-n attraction for bond H-C;  $D_2$  = (1/6)X GAMMA polarizability (DIP);  $D_3$  = Max. bonding contribution of one MO;  $D_4$  = Relative number of double bonds.

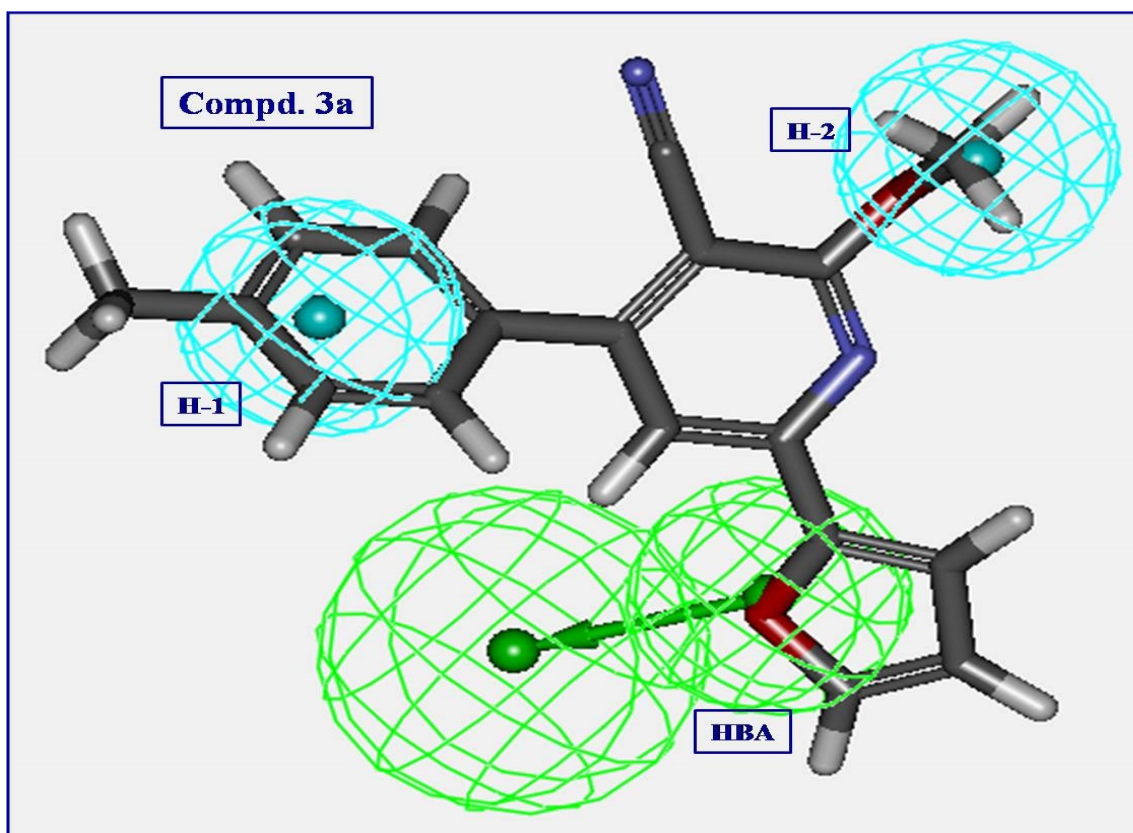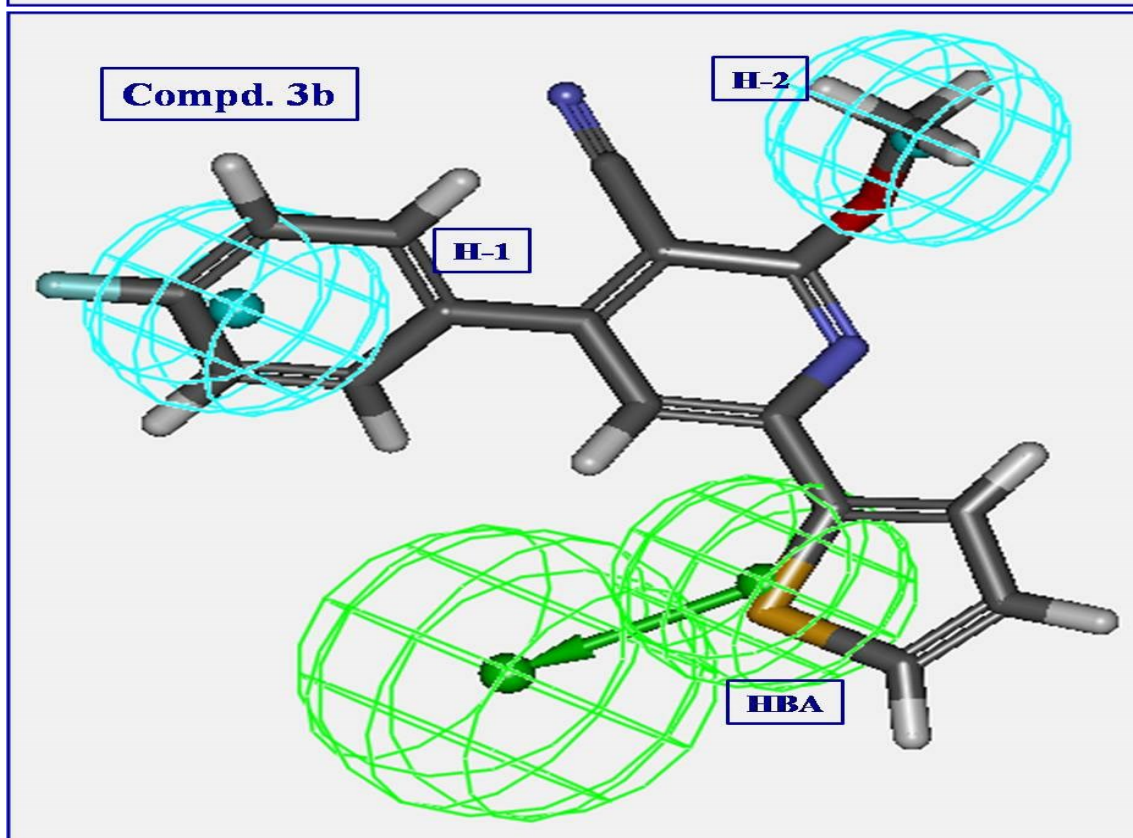



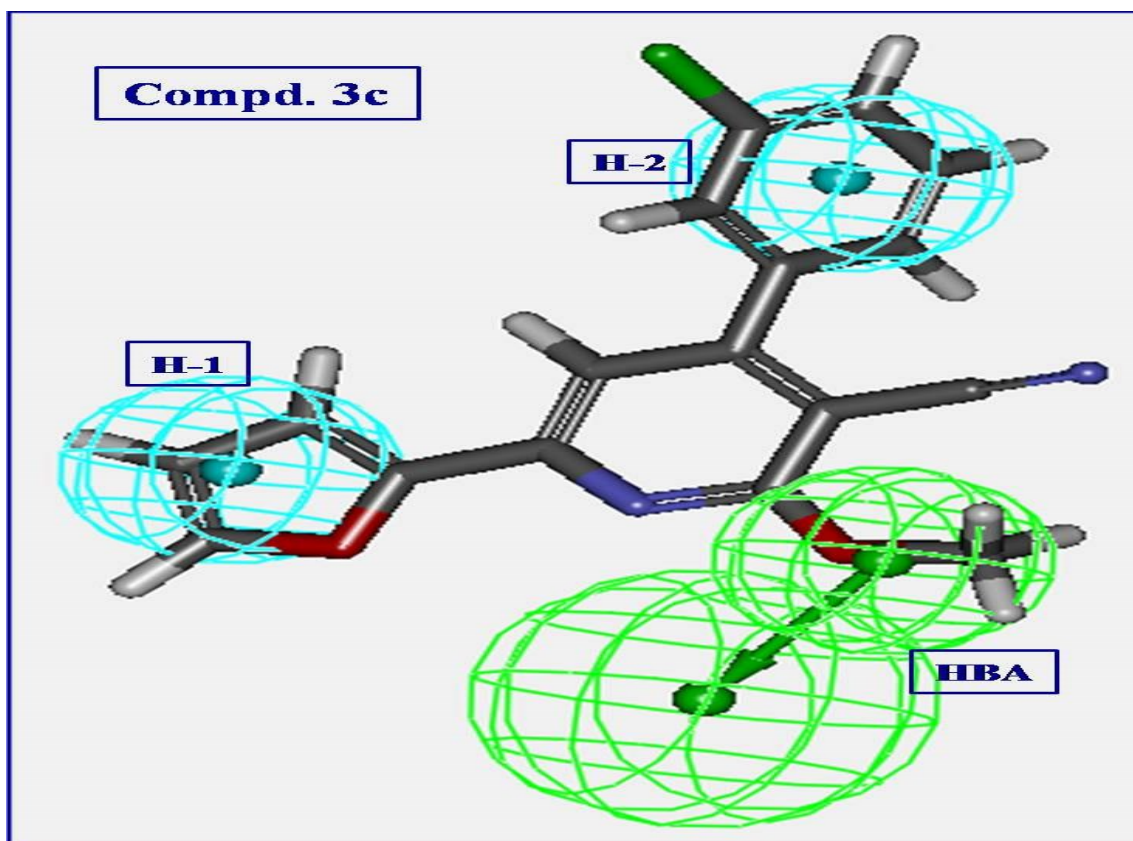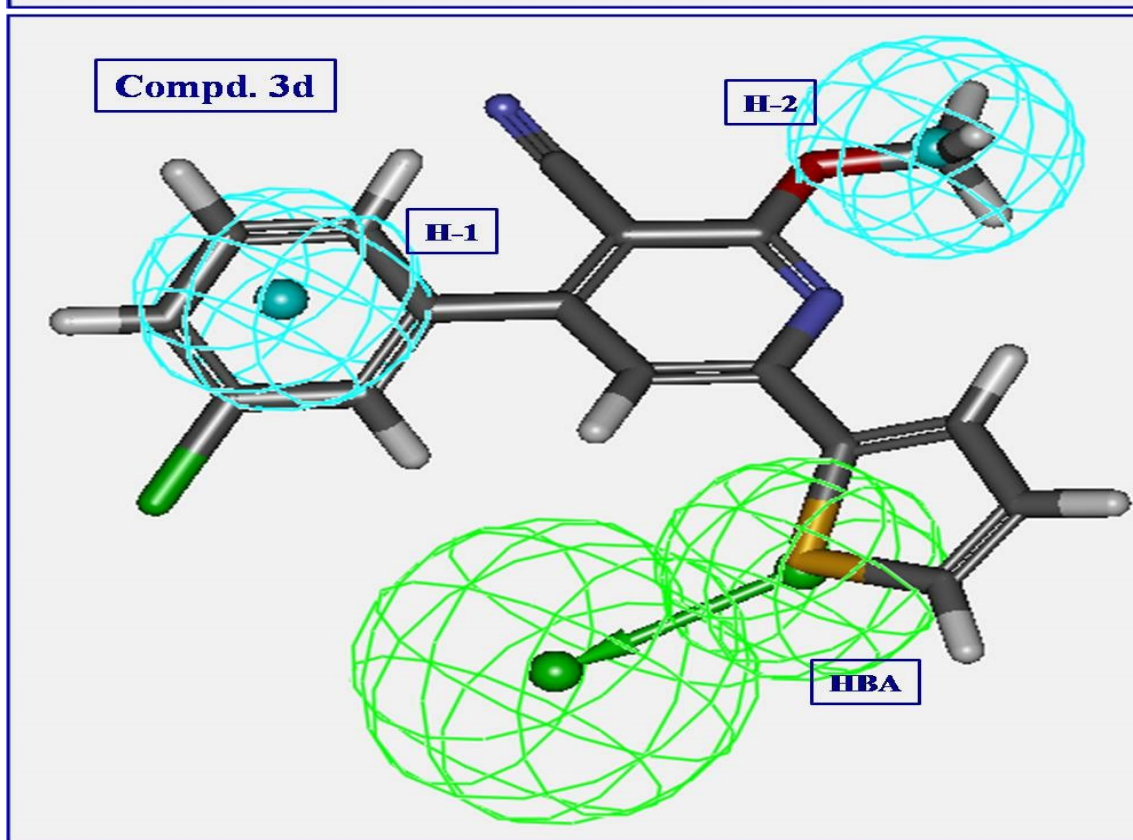

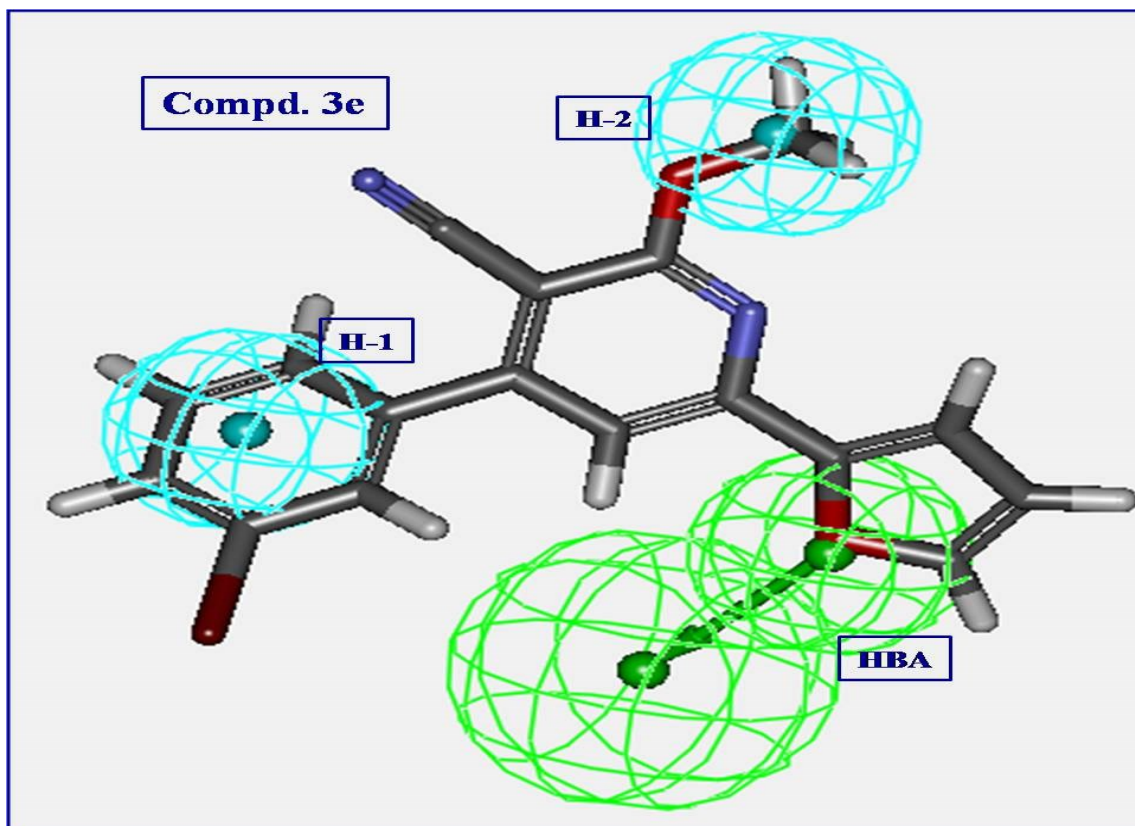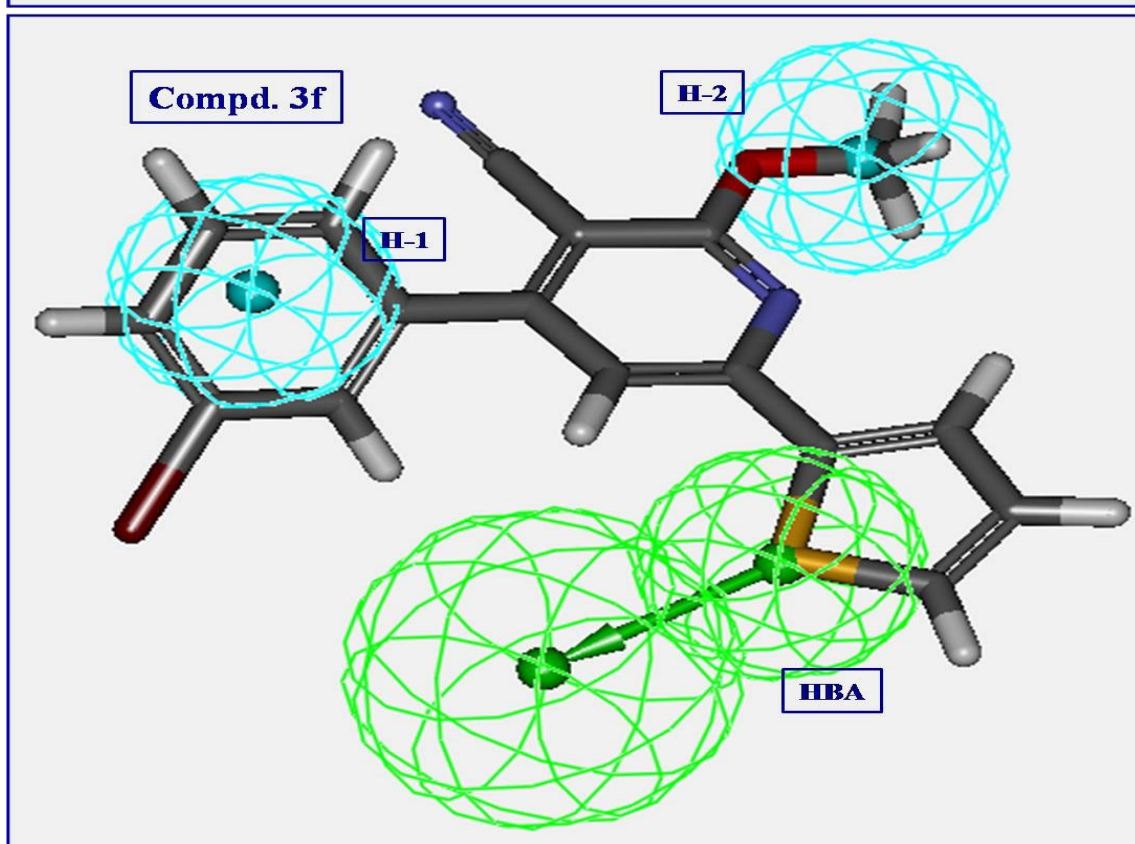

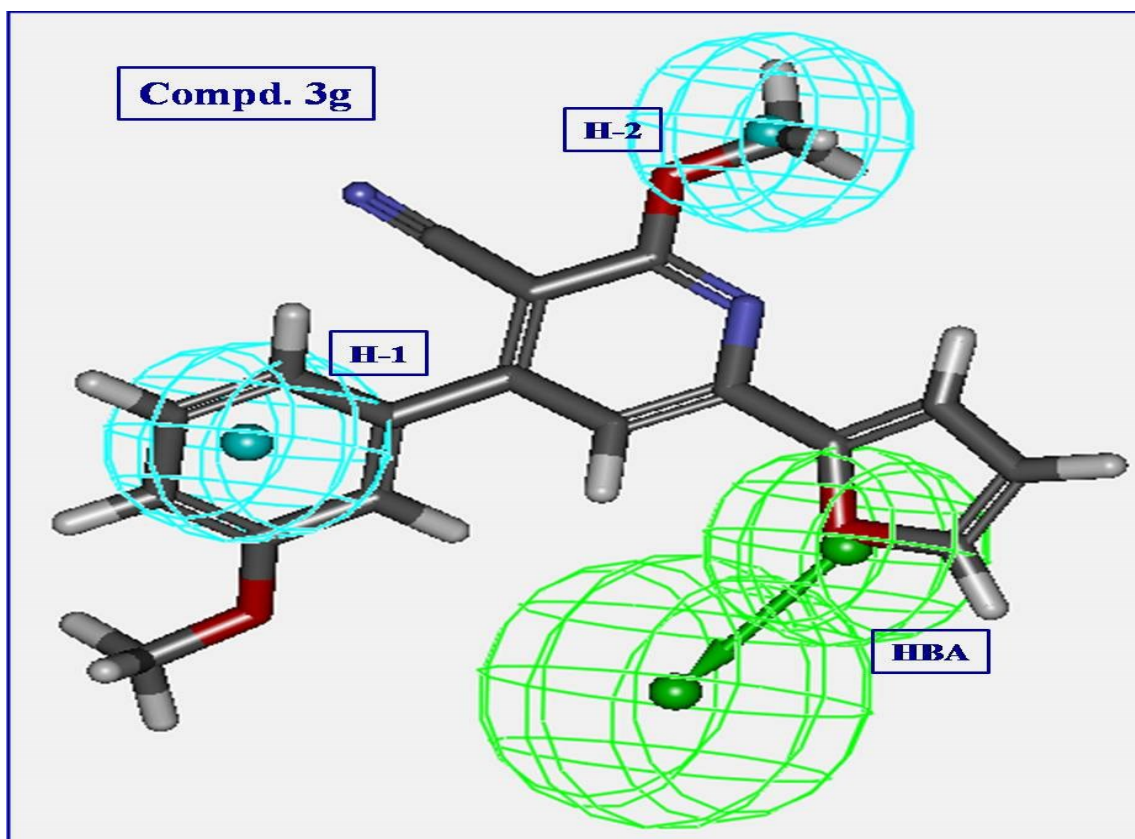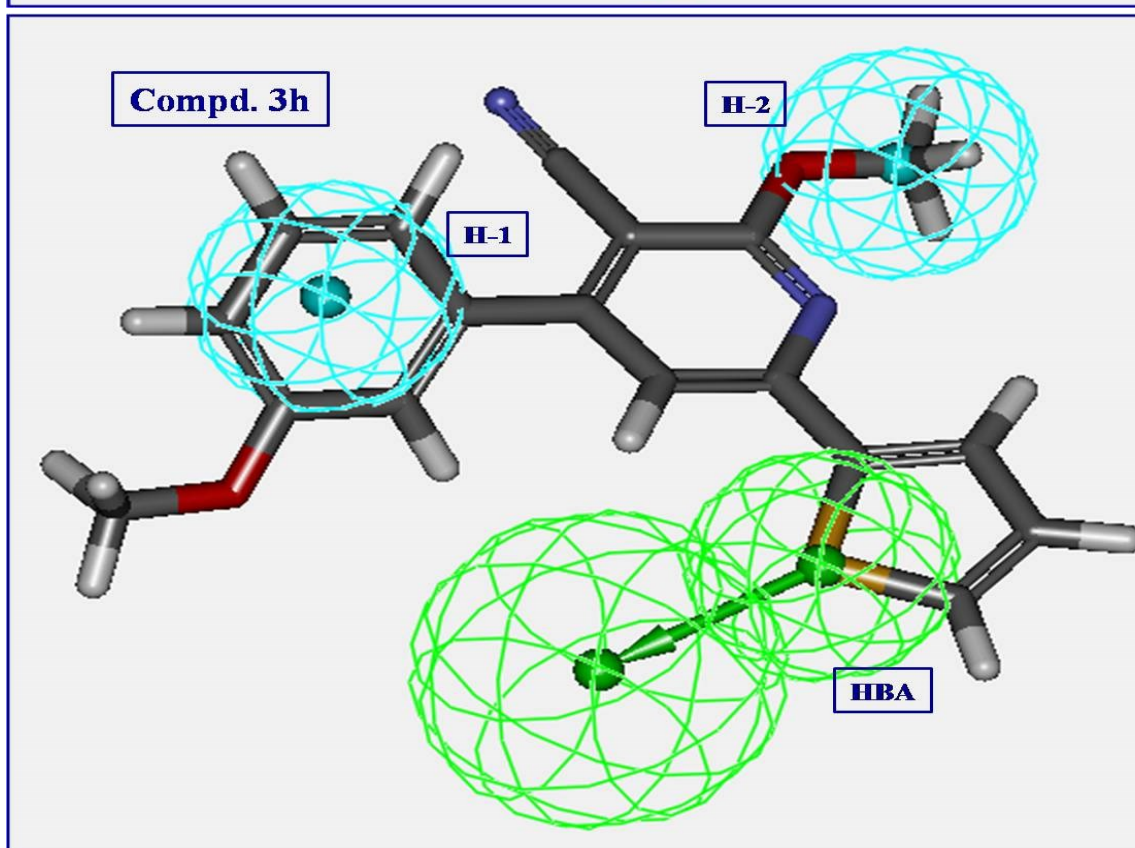

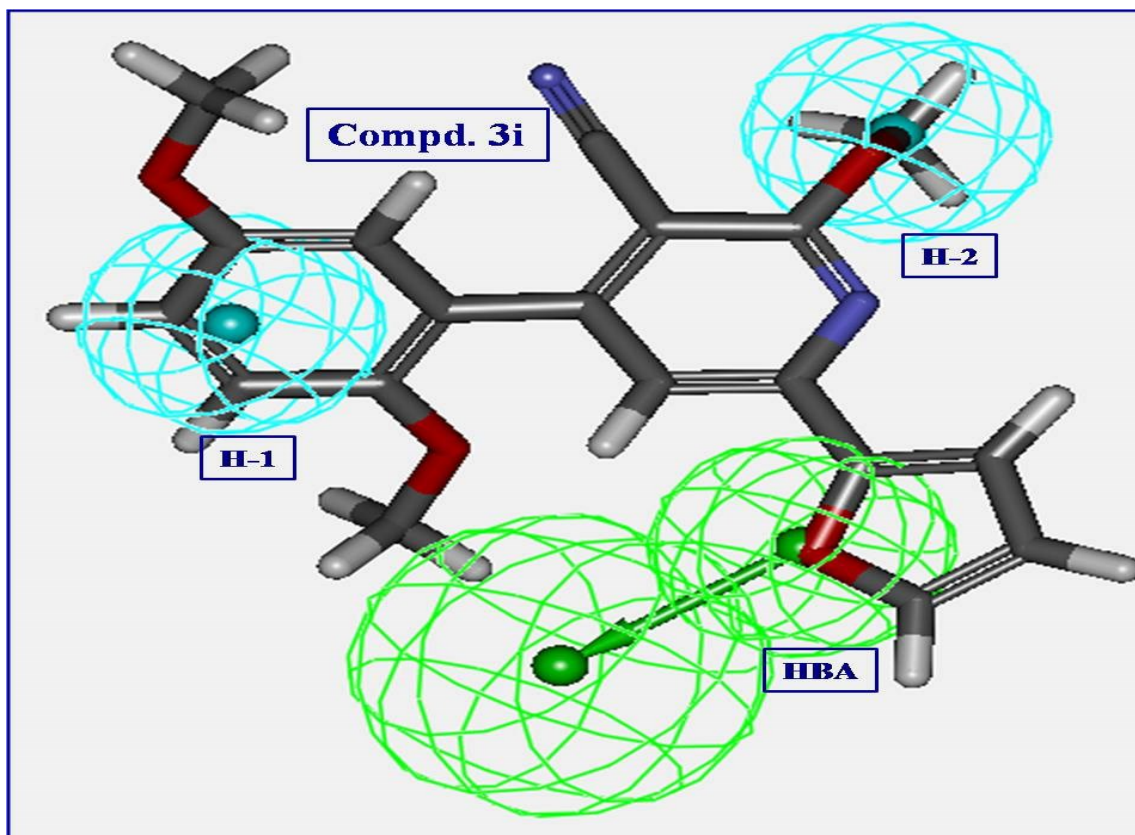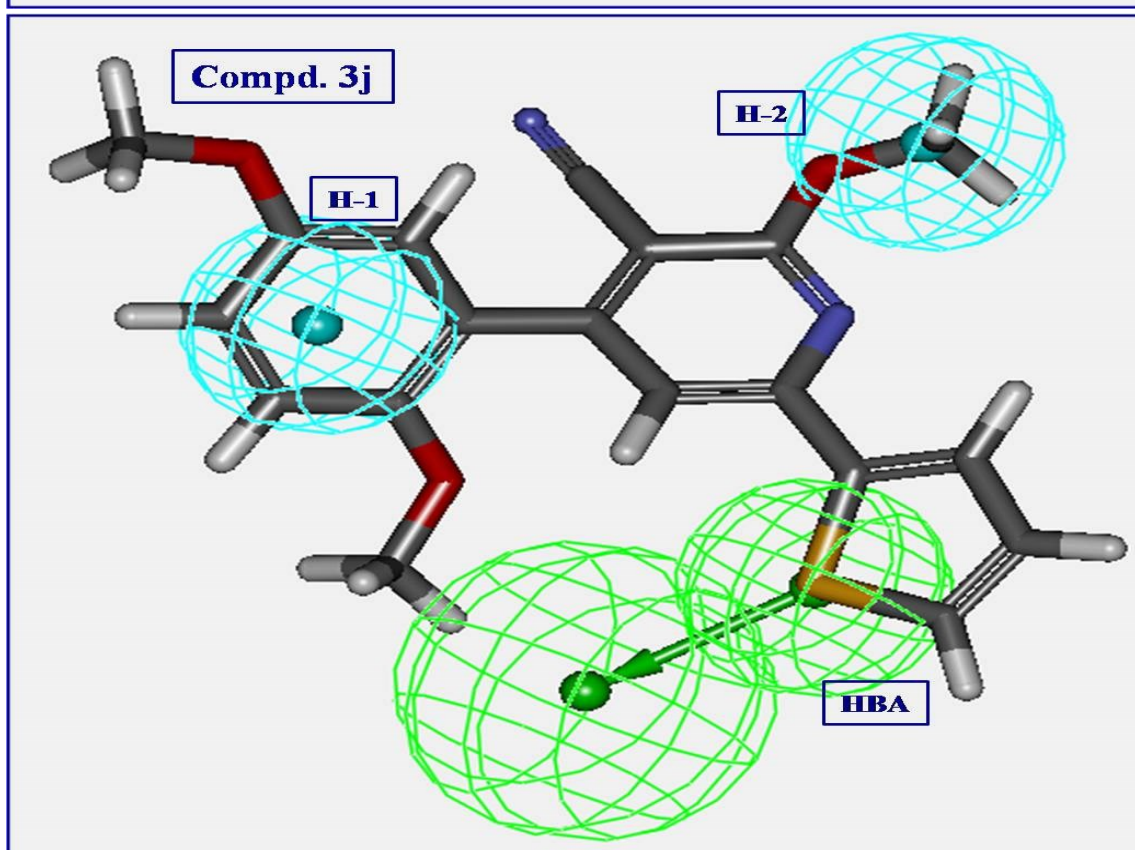

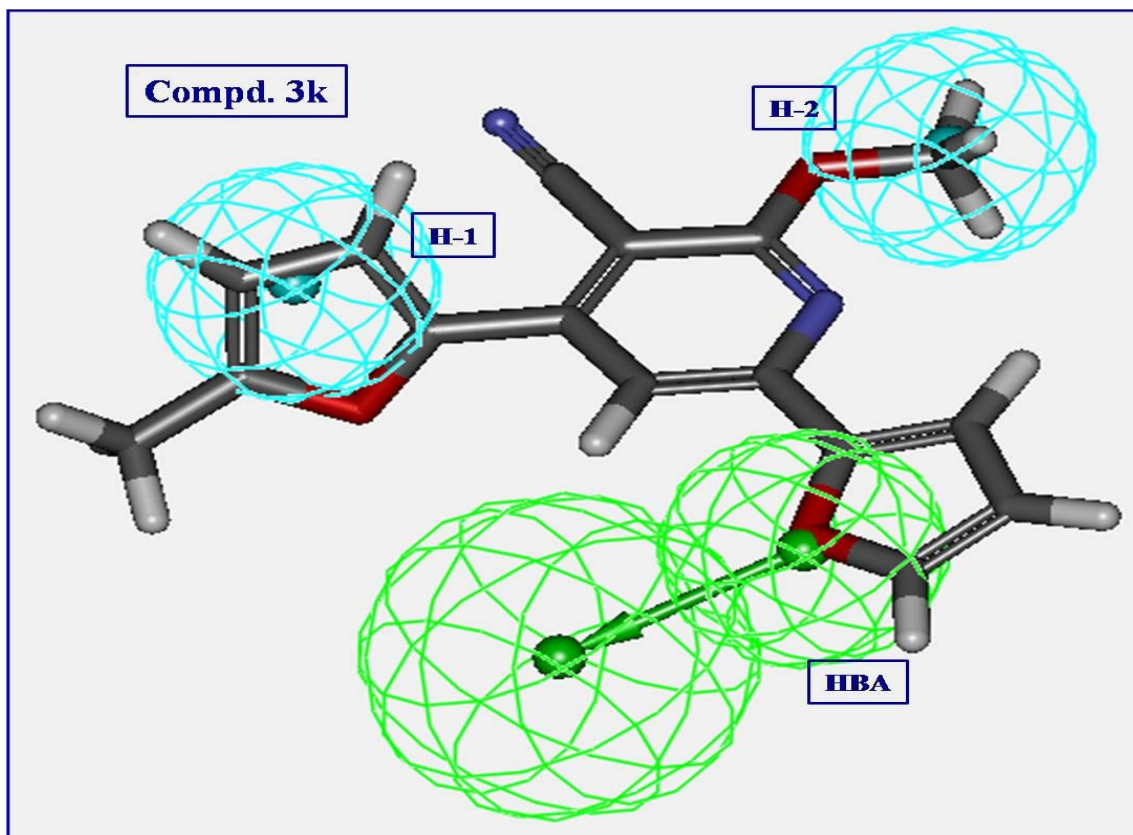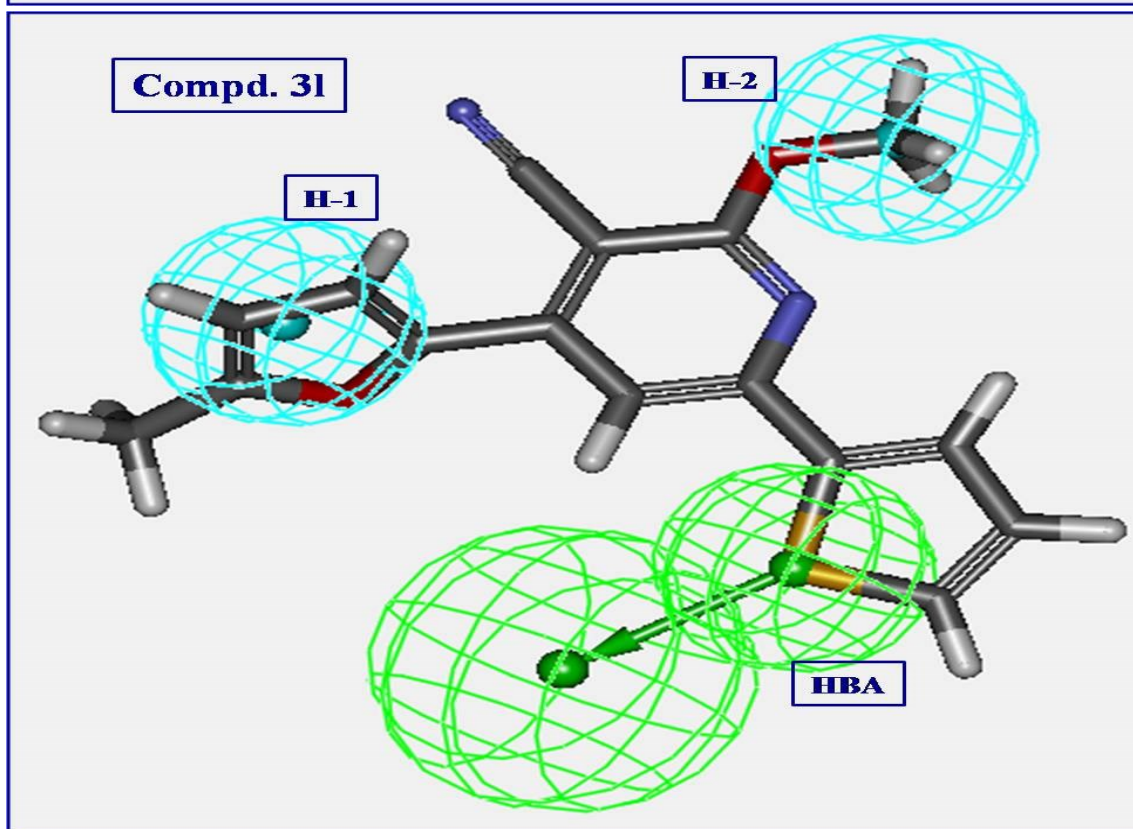

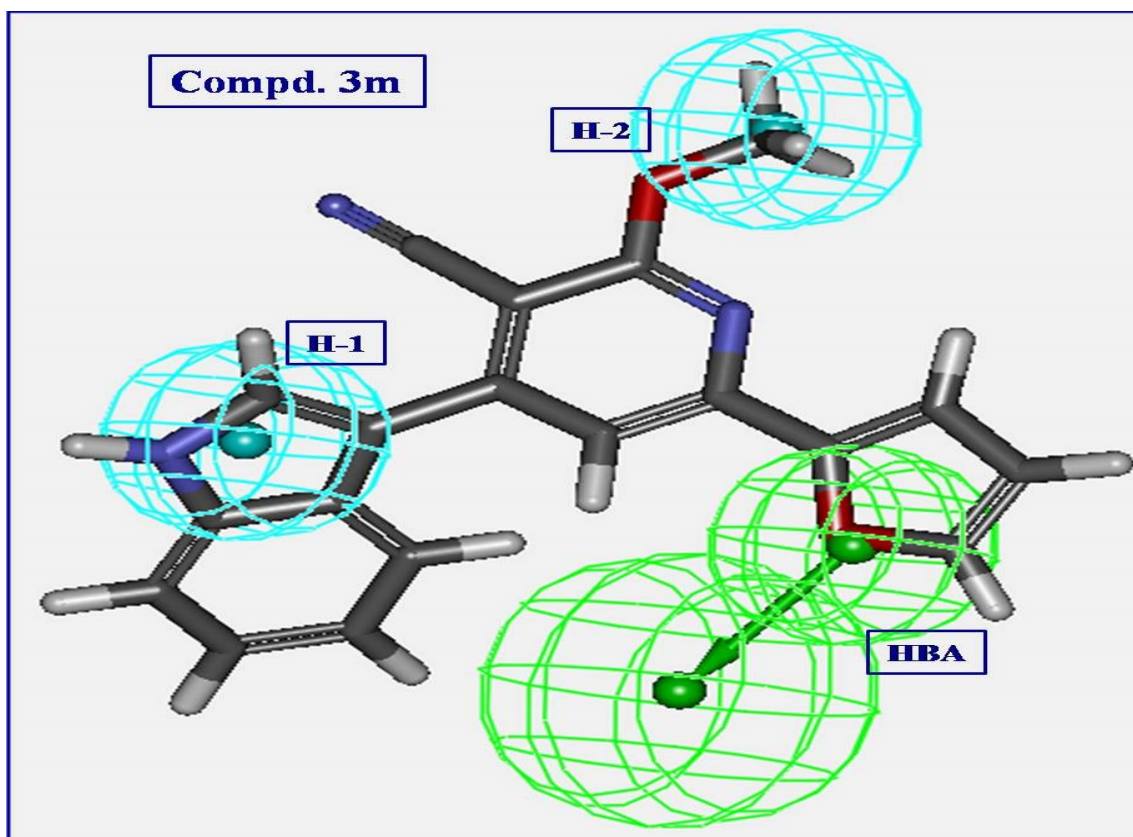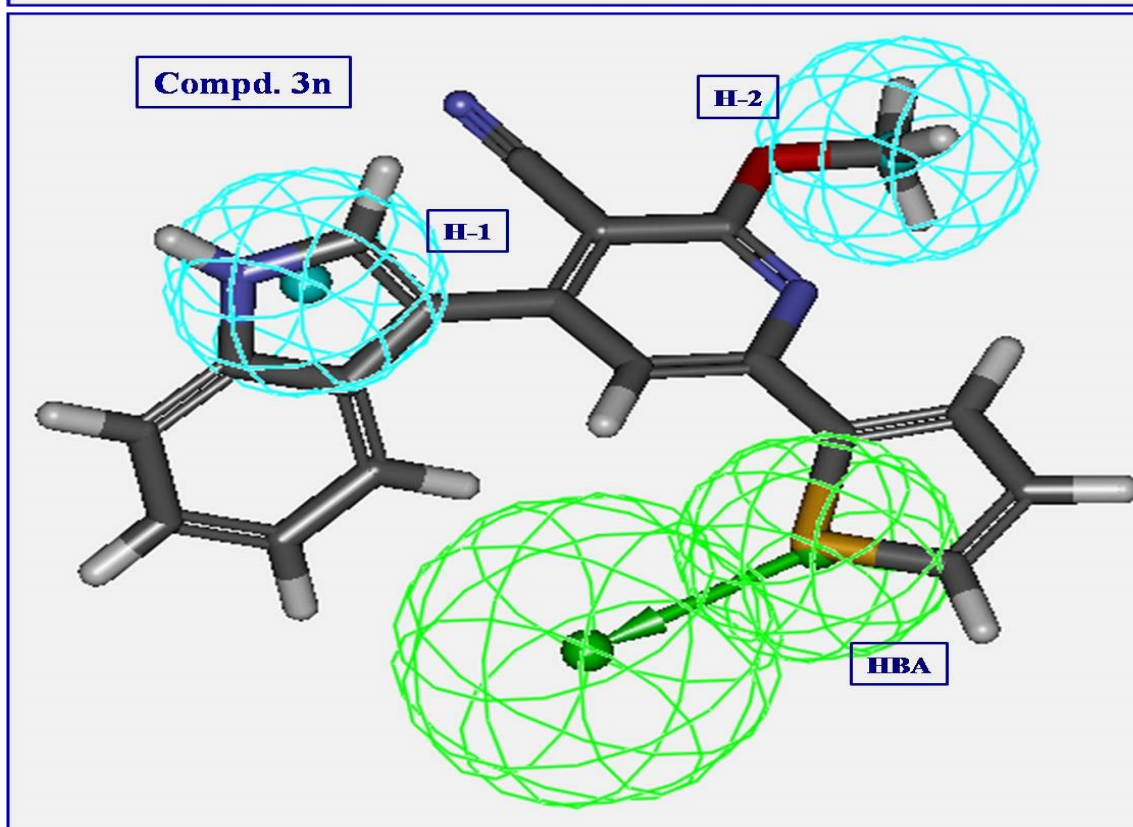

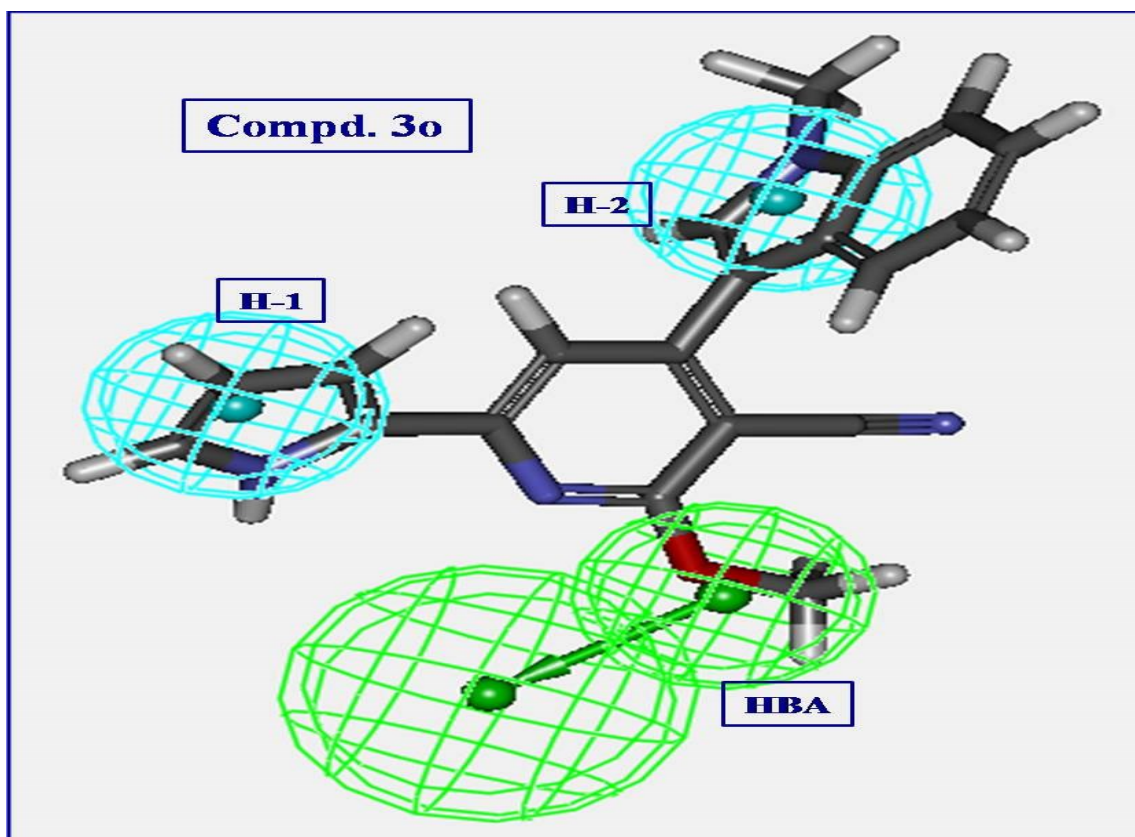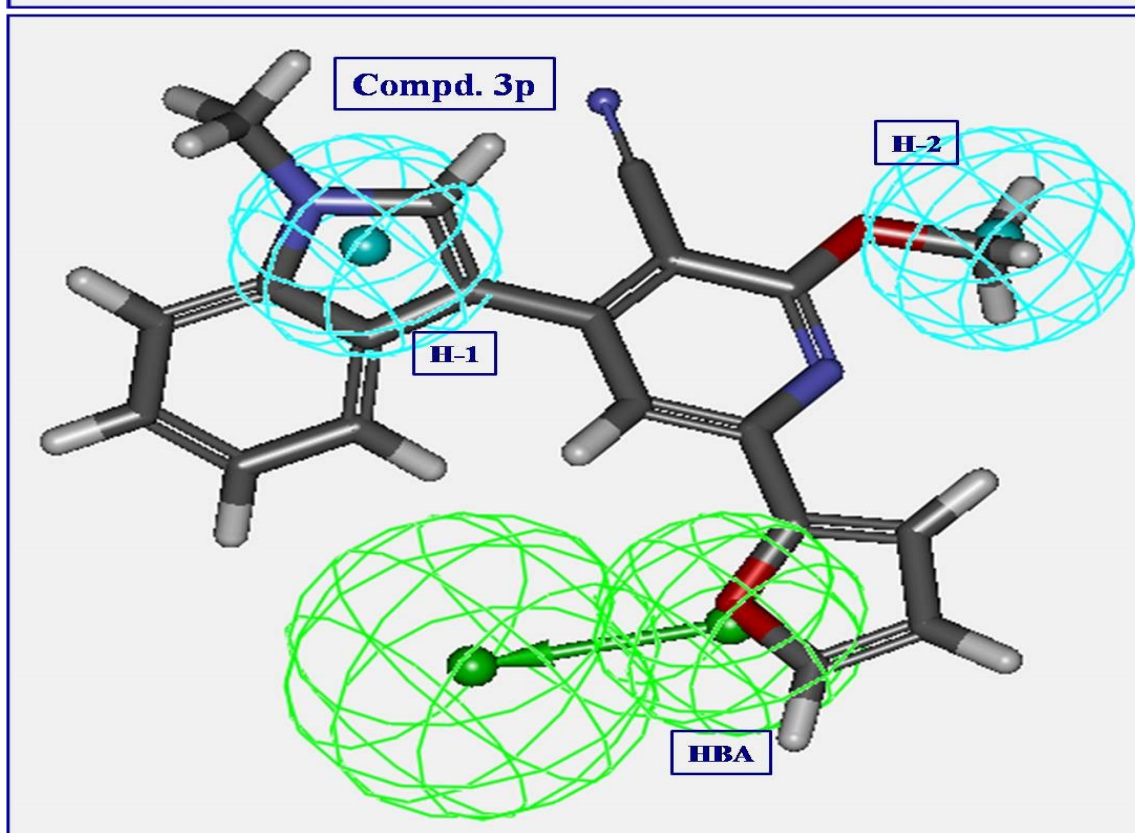

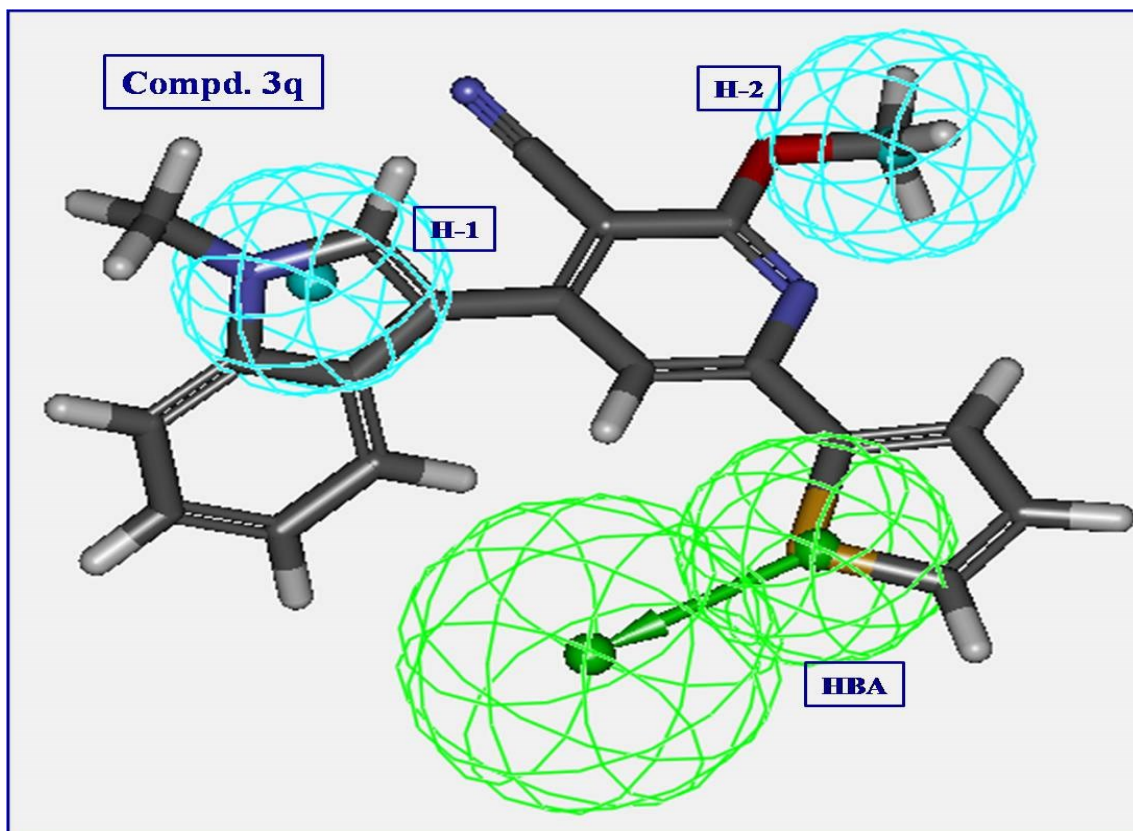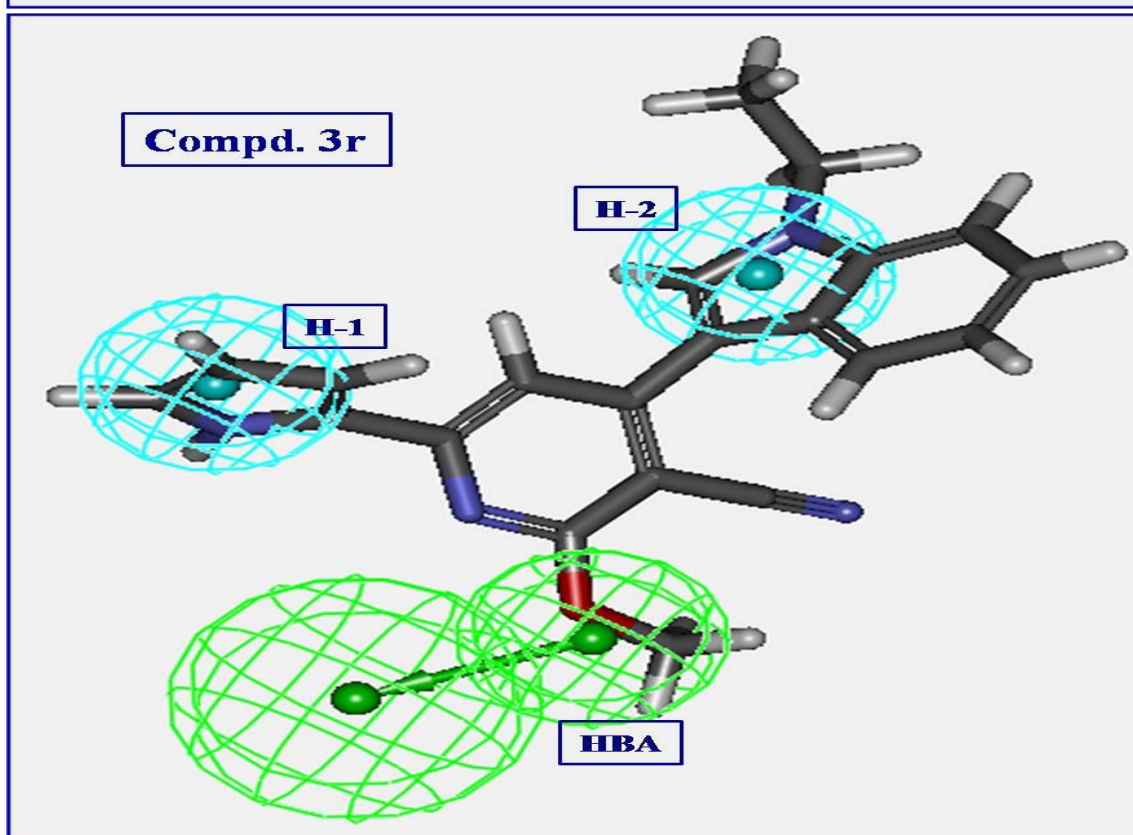



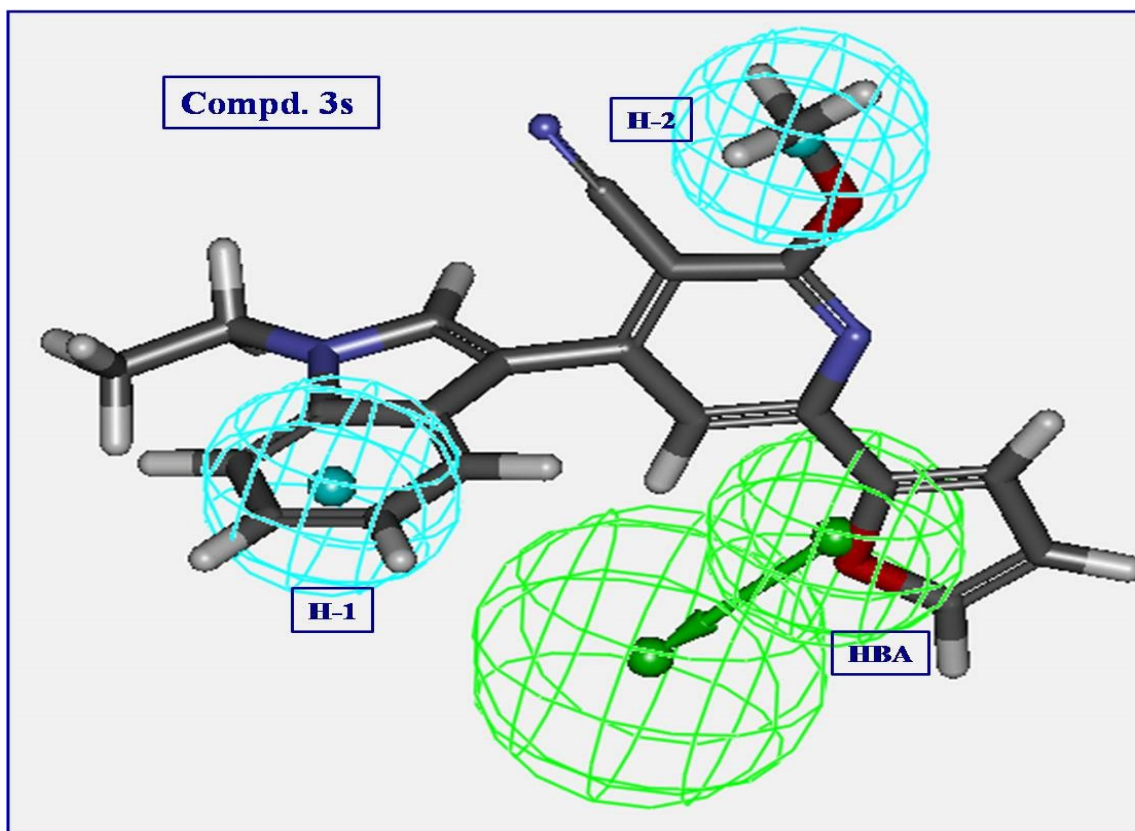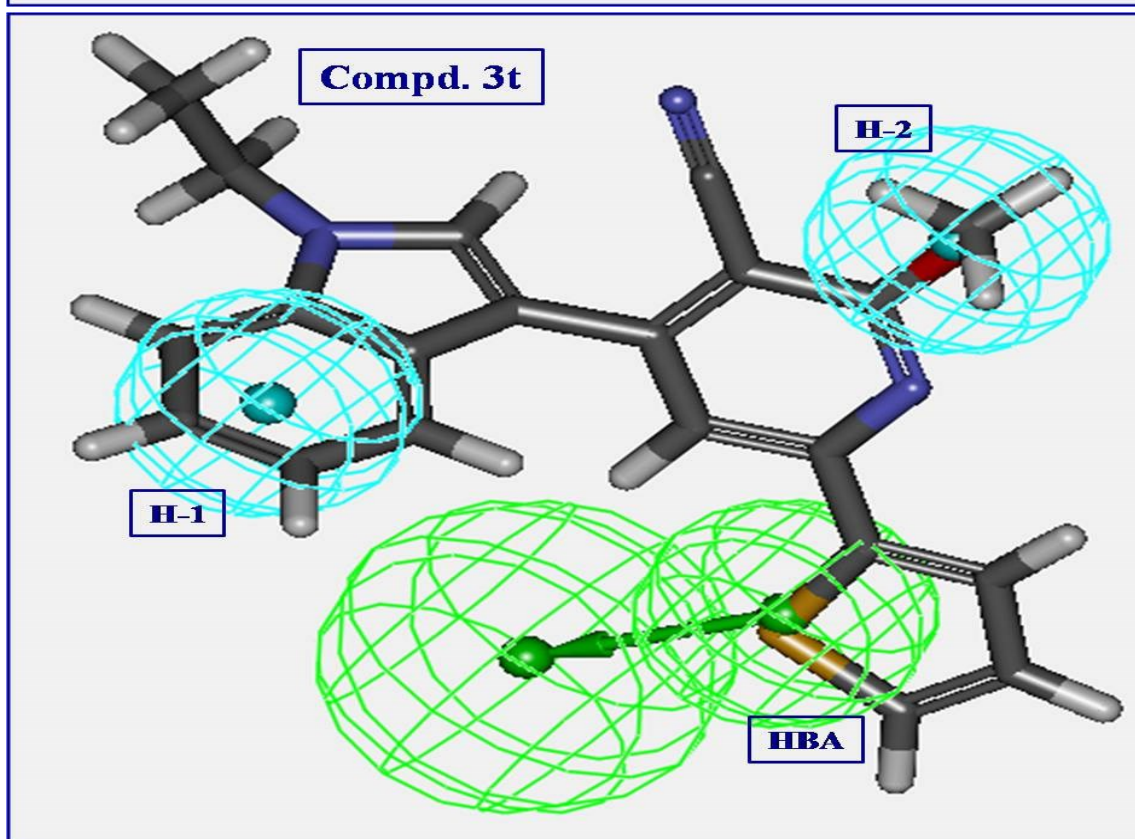

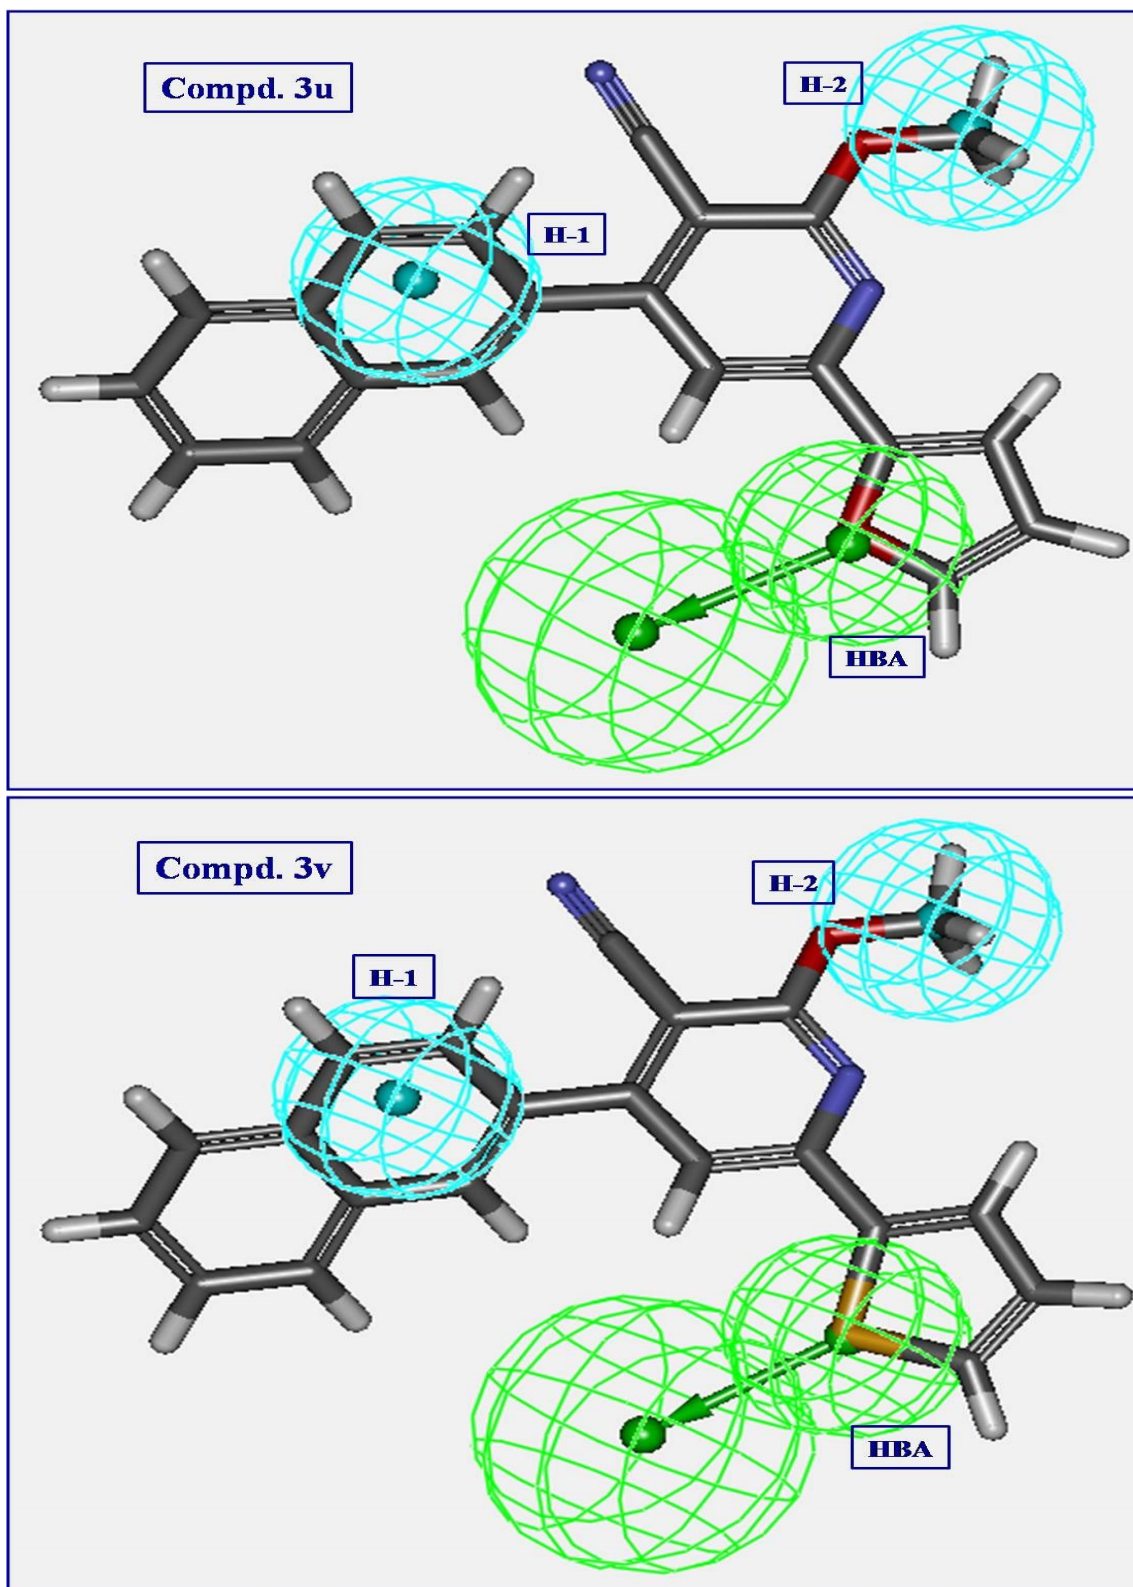

Fig. S1. 3D-pharmacophore model mapped on the tested compounds 3a-v.

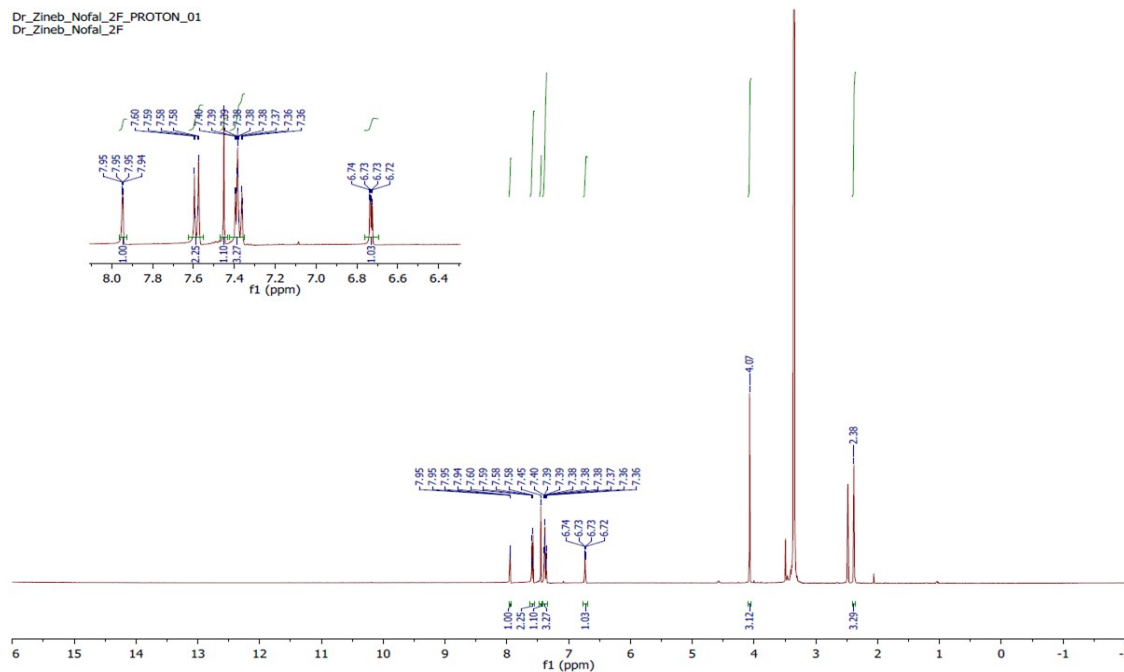

**Figure S2.**  $^1\text{H}$  NMR spectrum of compound **3a**.

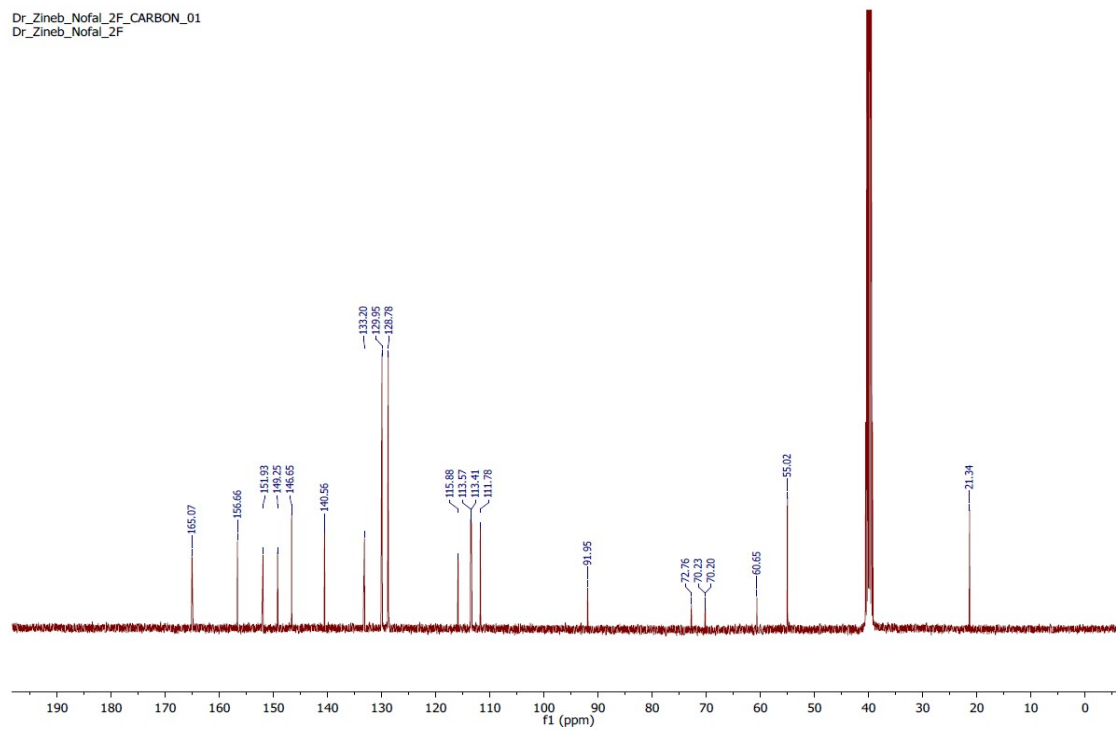

**Figure S3.**  $^{13}\text{C}$  NMR spectrum of compound **3a**.

Alaa-2F #522 RT: 1.81 AV: 1 NL: 1.00E7  
T: (0,0) +c EI Full ms [50.00-450.00]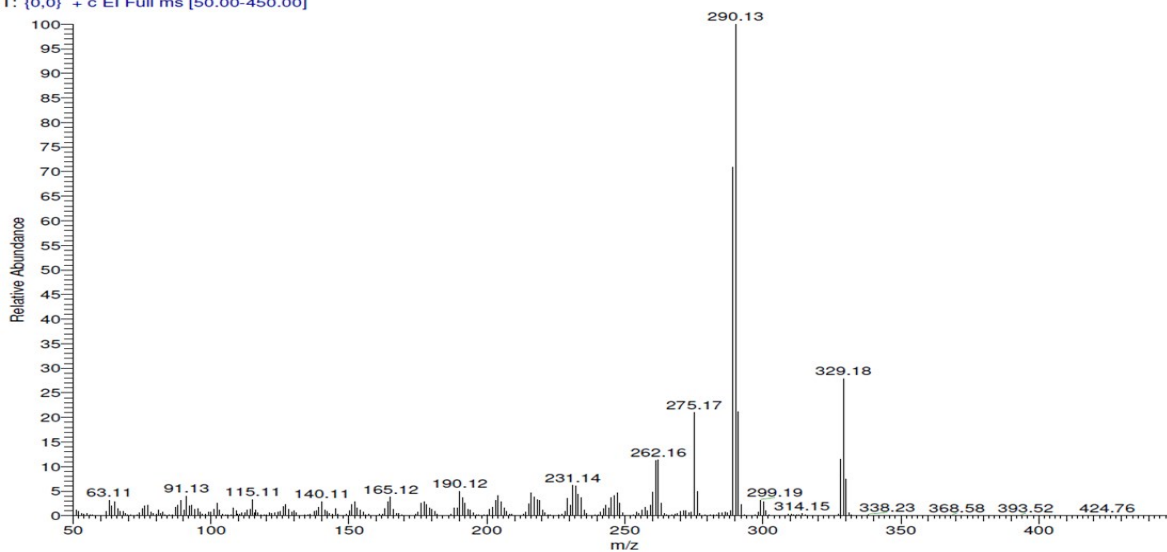

Figure S4. Mass spectrum of compound 3a.

Dr\_Zineb\_Nofal\_3T\_PROTON\_01  
Dr\_Zineb\_Nofal\_3T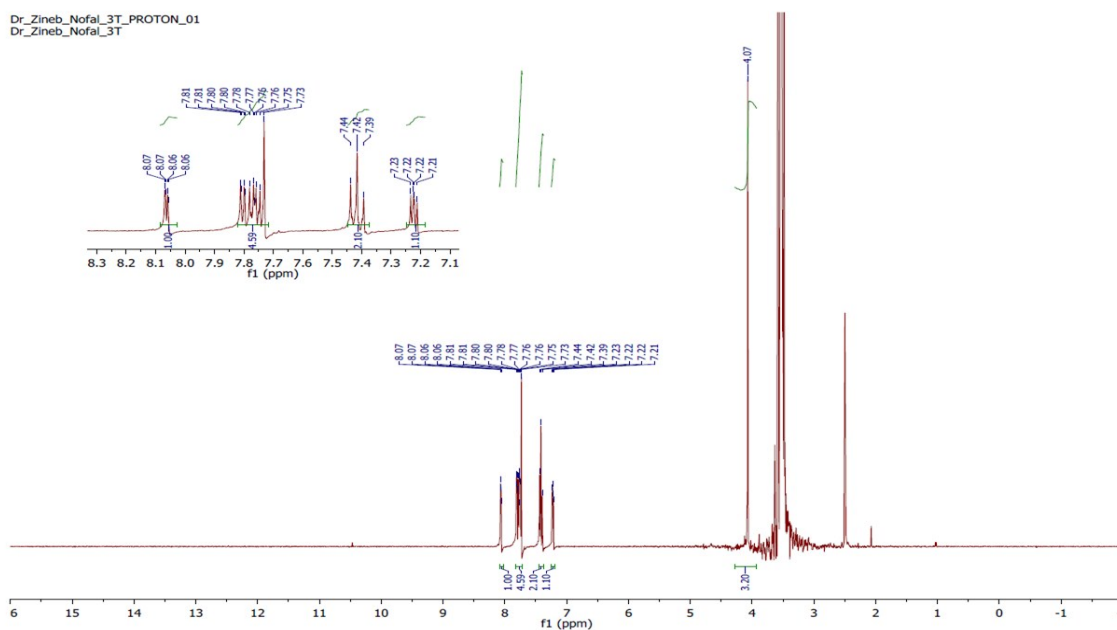Figure S5. <sup>1</sup>H NMR spectrum of compound 3b.

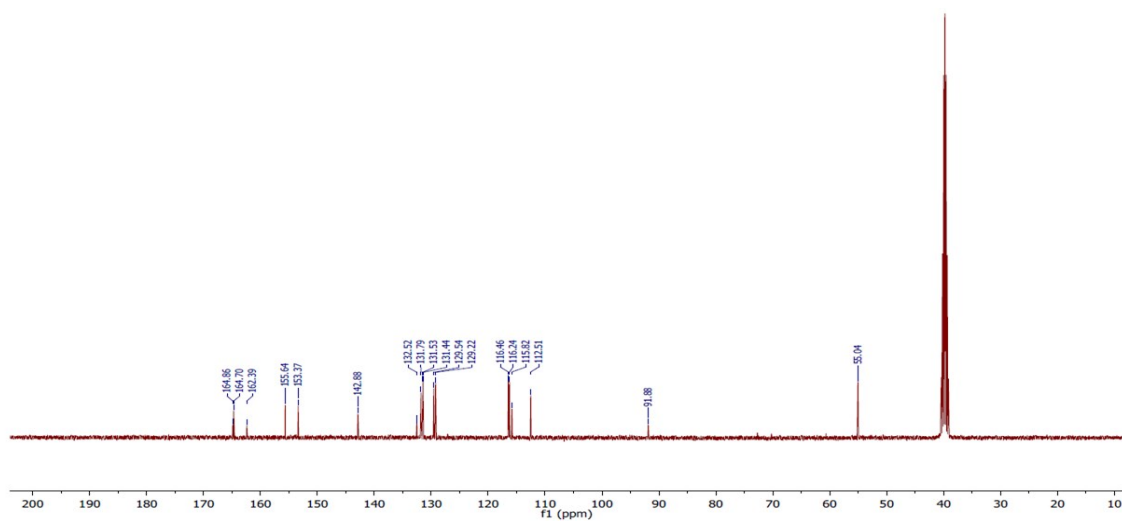

Figure S6. <sup>13</sup>C NMR spectrum of compound 3b.

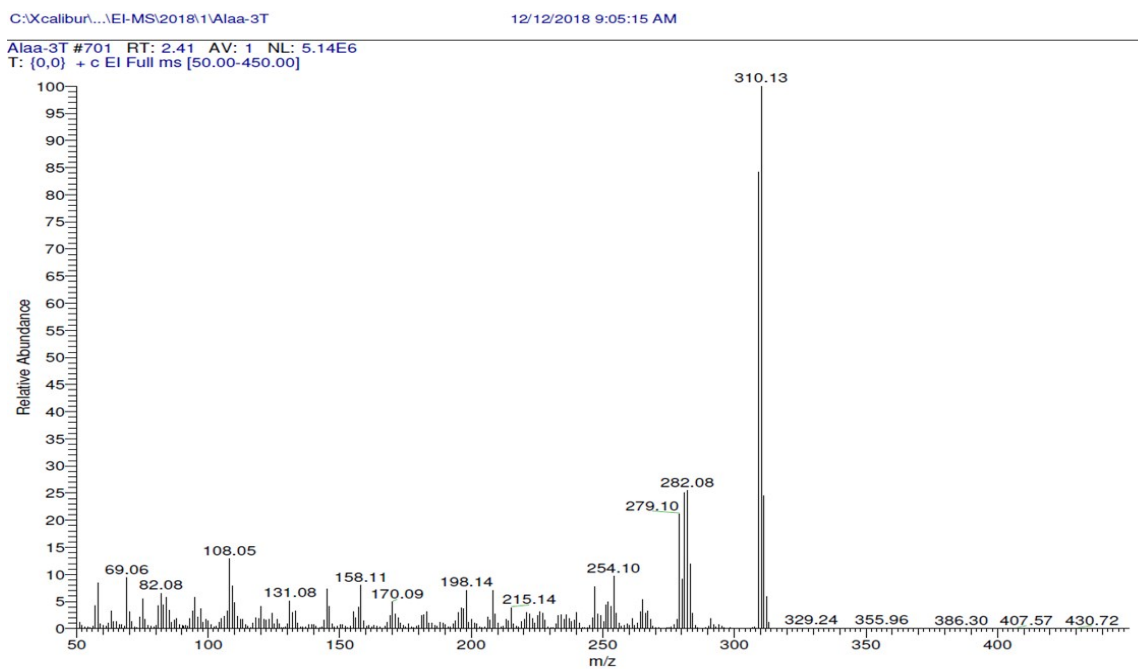

Figure S7. Mass spectrum of compound 3b.

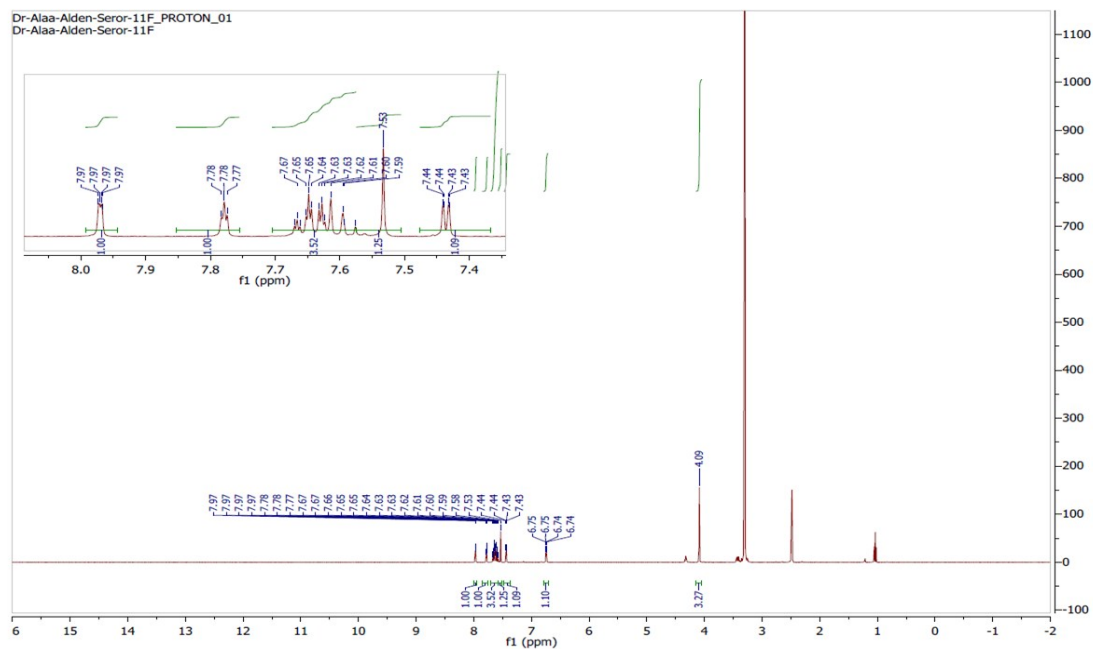

**Figure S8.**  $^1\text{H}$  NMR spectrum of compound **3c**.

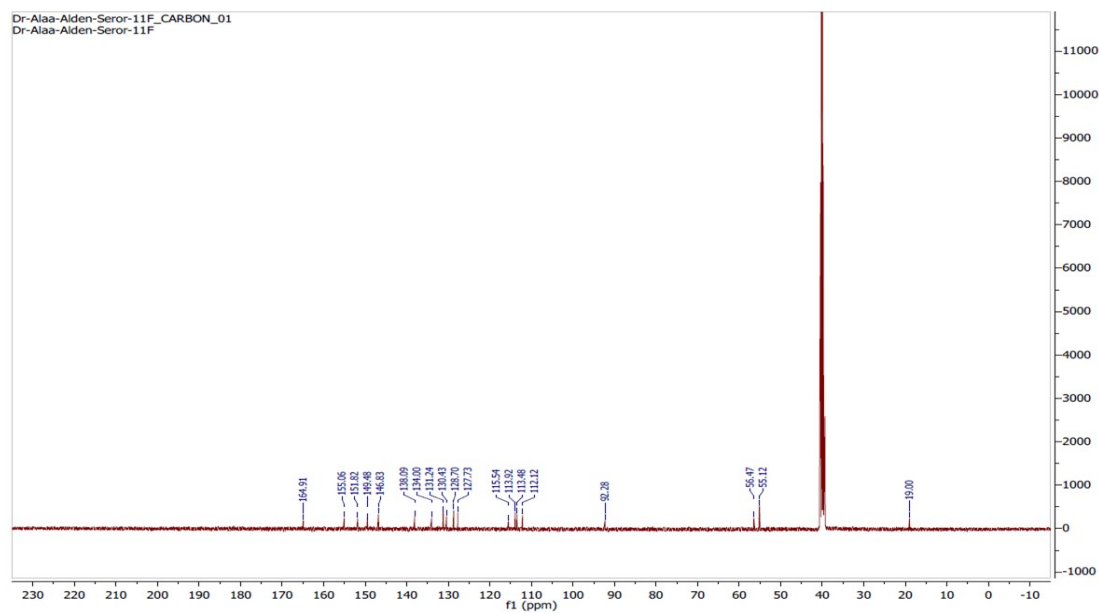

**Figure S9.**  $^{13}\text{C}$  NMR spectrum of compound **3c**.

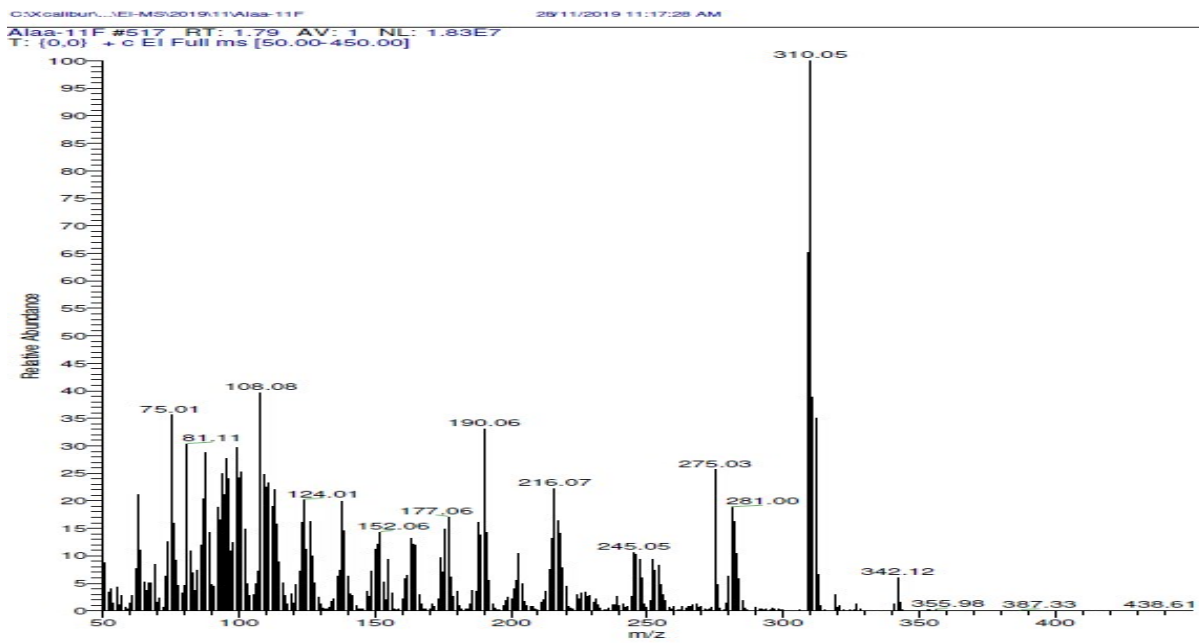

Figure S10. Mass spectrum of compound 3c.

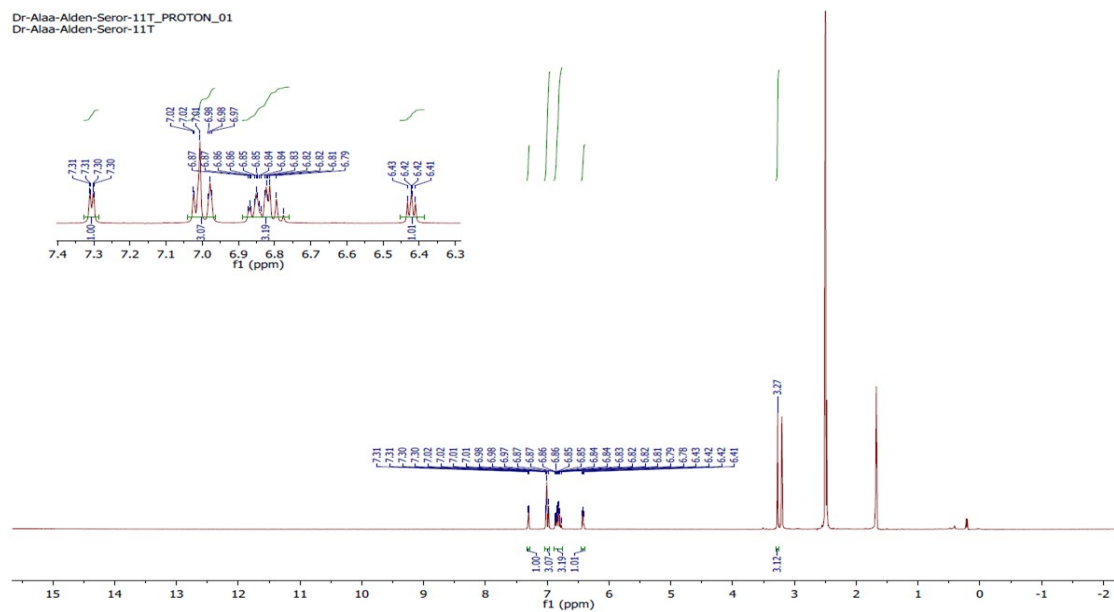

Figure S11. <sup>1</sup>H NMR spectrum of compound 3d.

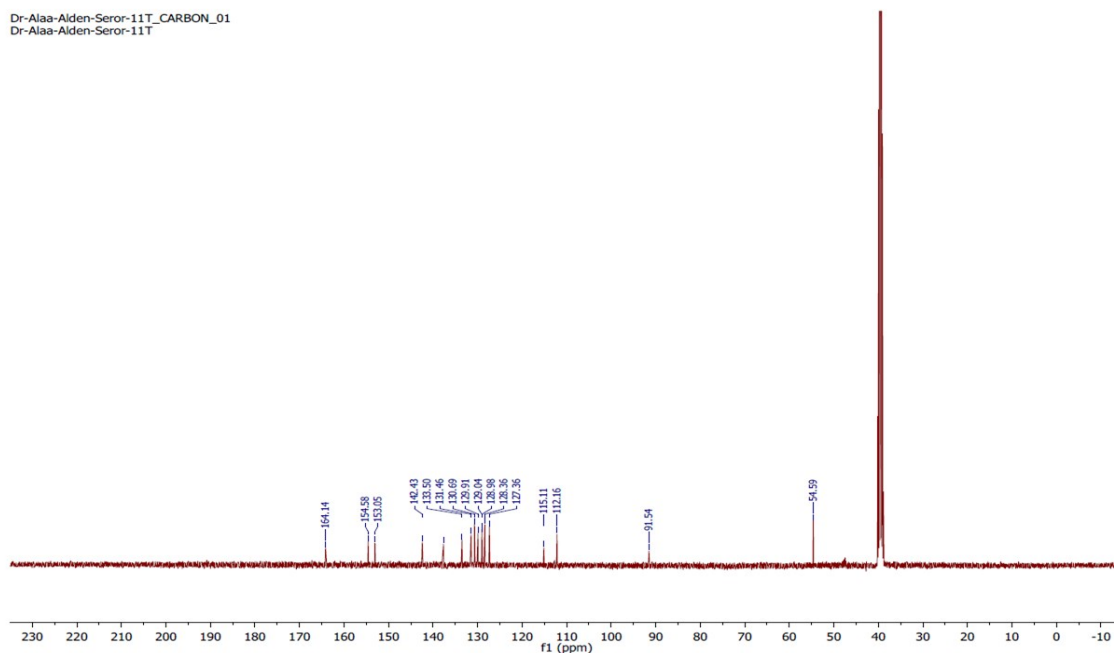

Figure S12.  $^{13}\text{C}$  NMR spectrum of compound 3d.

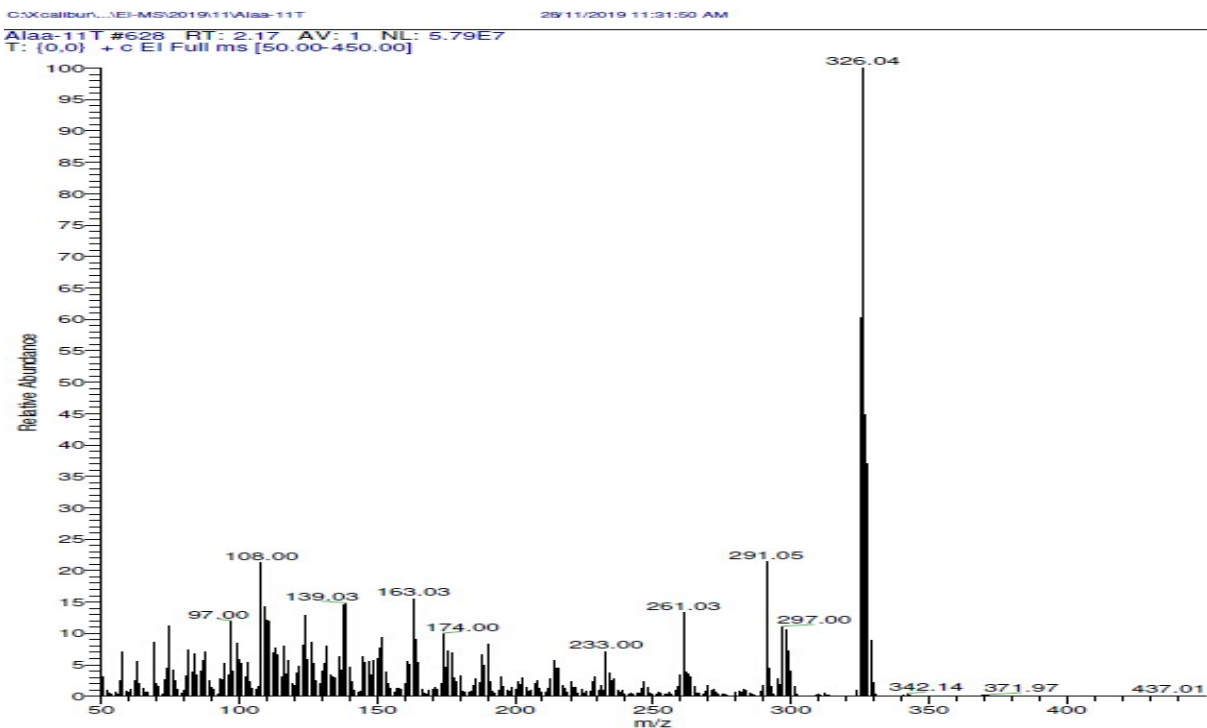

Figure S13. Mass spectrum of compound 3d.



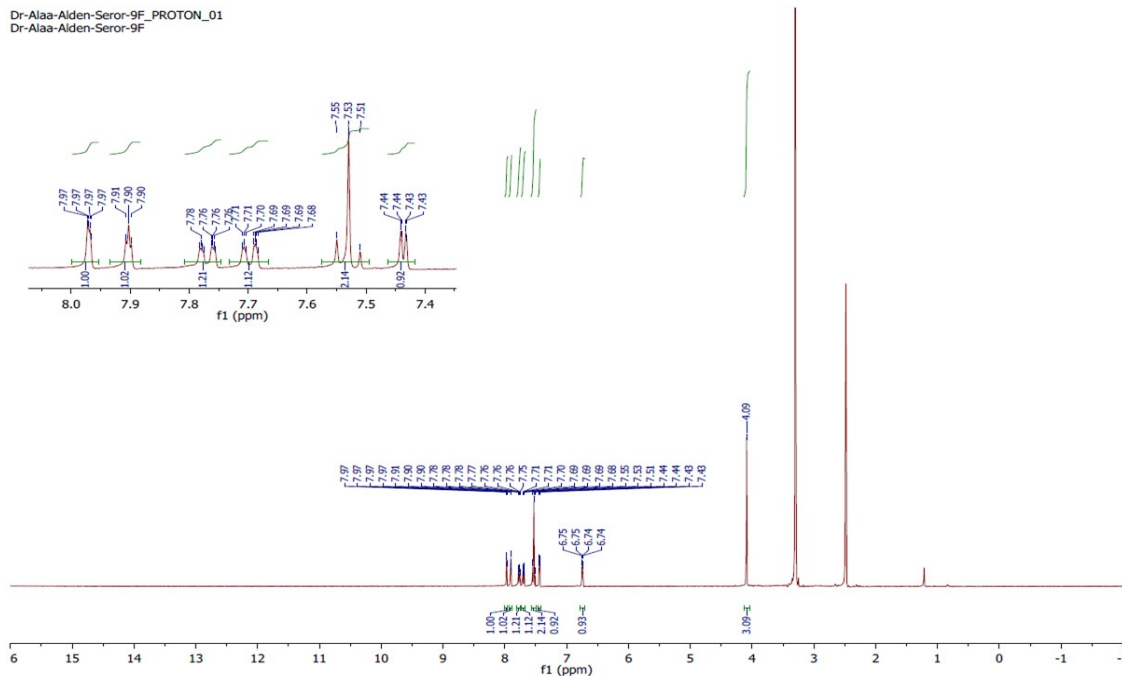

Figure S14. <sup>1</sup>H NMR spectrum of compound **3e**.

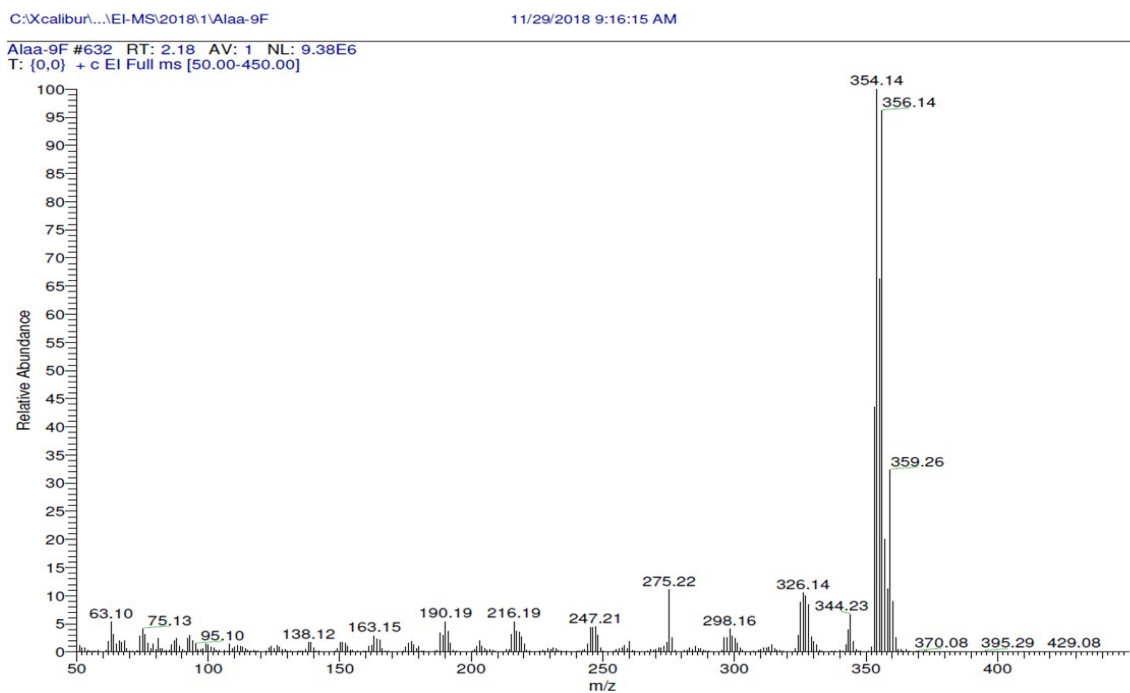

Figure S15. Mass spectrum of compound **3e**.

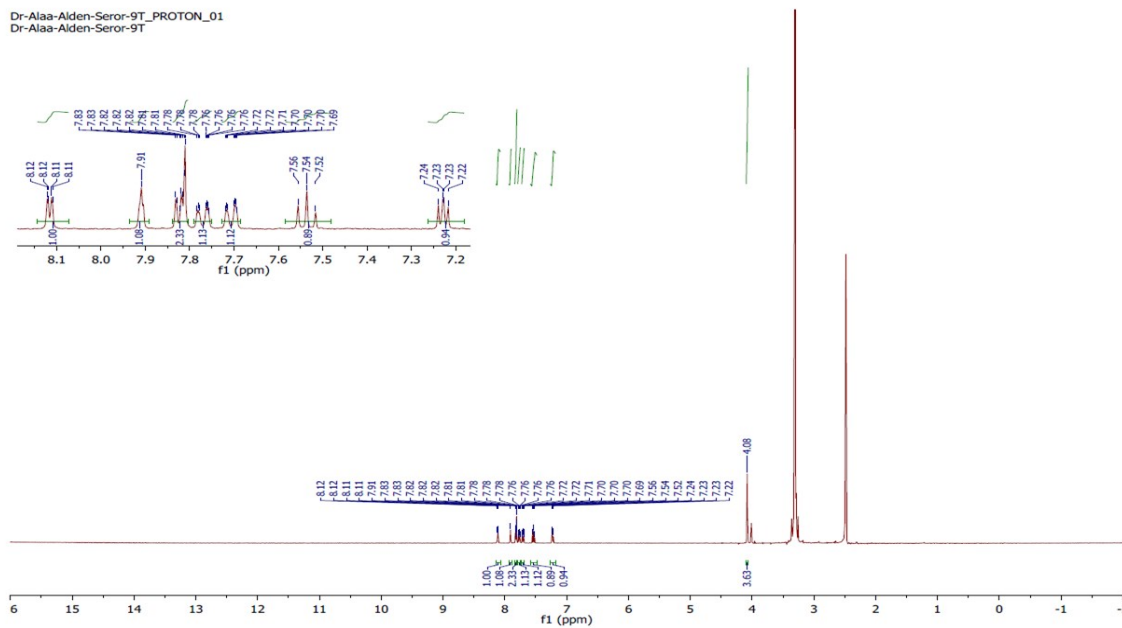

**Figure S16.**  $^1\text{H}$  NMR spectrum of compound **3f**.

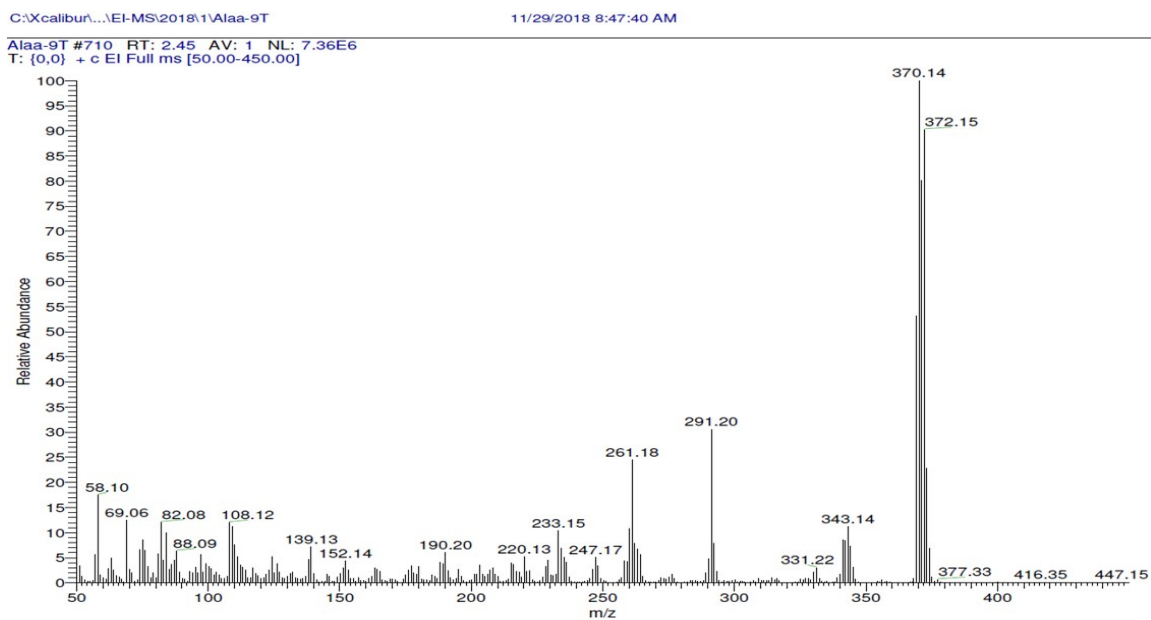

**Figure S17.** Mass spectrum of compound **3f**.

Dr-Alaa-Alden-Seror-12F\_PROTON\_01  
Dr-Alaa-Alden-Seror-12F

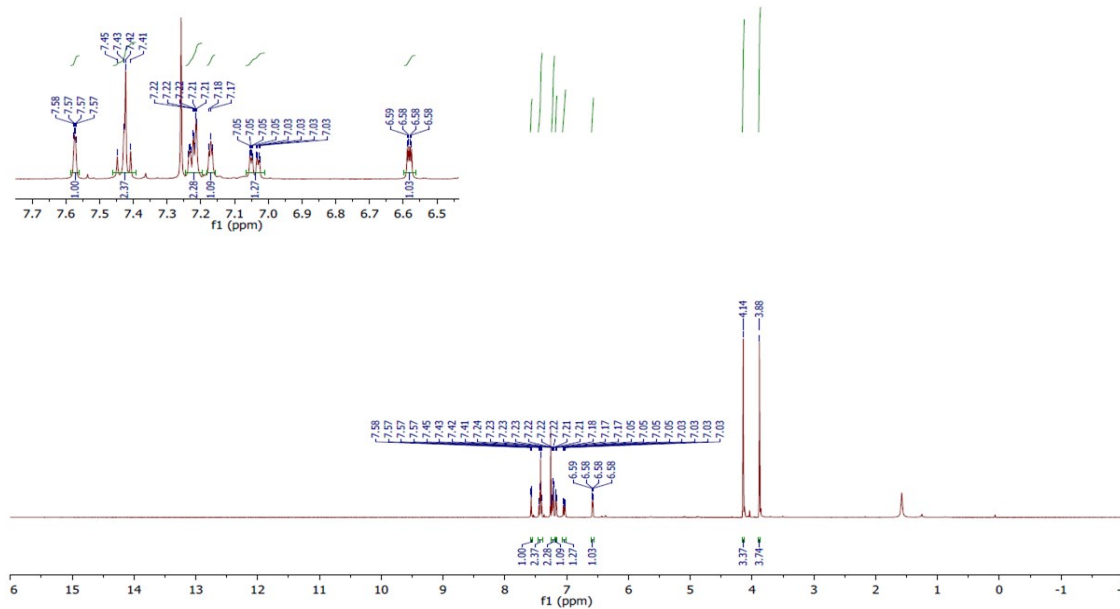

Figure S18. <sup>1</sup>H NMR spectrum of compound 3g.

Dr-Alaa-Alden-Seror-12F\_CARBON\_01  
Dr-Alaa-Alden-Seror-12F

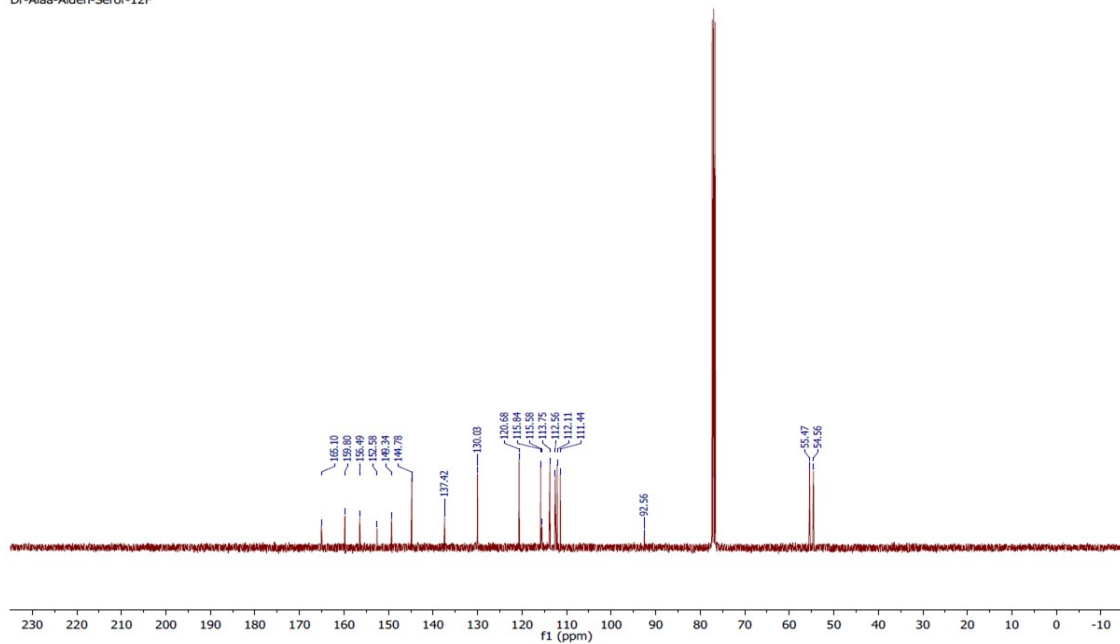

Figure S19. <sup>13</sup>C NMR spectrum of compound 3g.

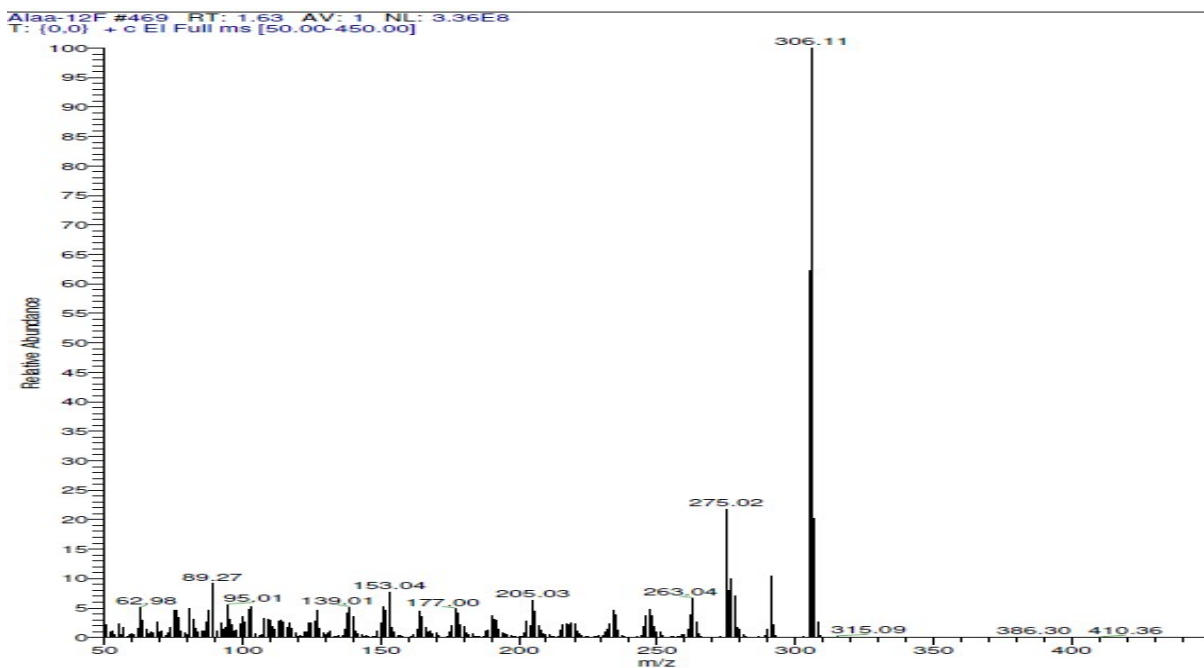

Figure S20. Mass spectrum of compound **3g**.

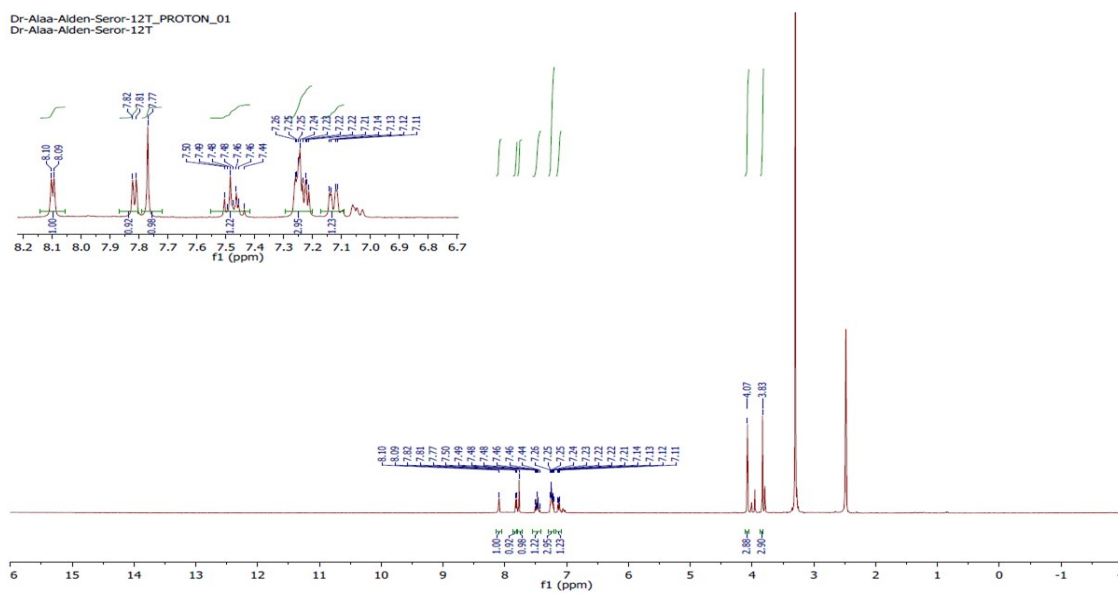

Figure S21.  $^1\text{H}$  NMR spectrum of compound **3h**.

Dr-Alaa-Alden-Seror-12T\_CARBON\_01  
Dr-Alaa-Alden-Seror-12T

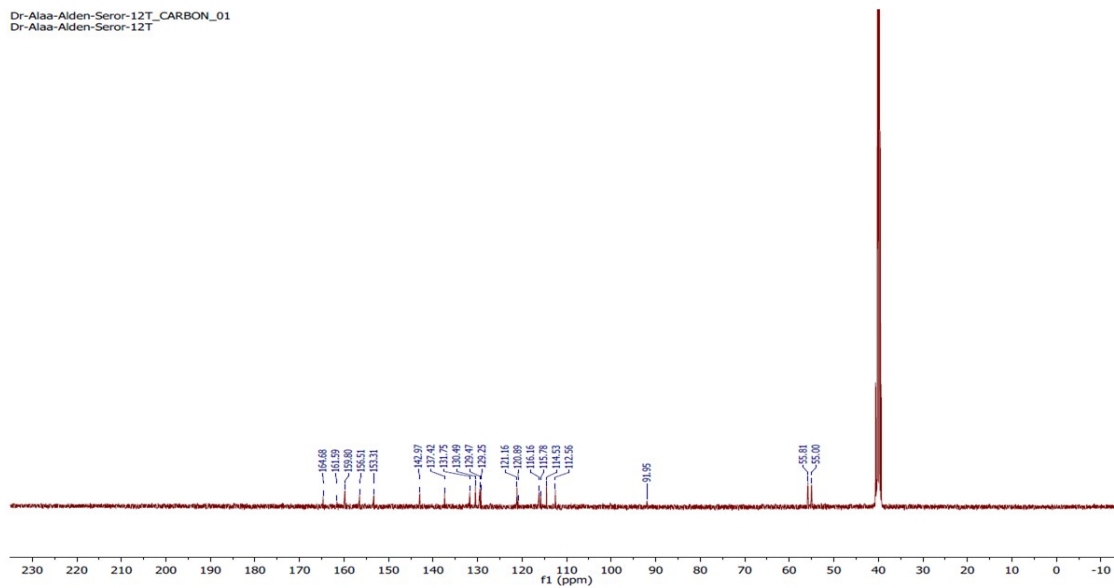

Figure S22. <sup>13</sup>C NMR spectrum of compound 3h.

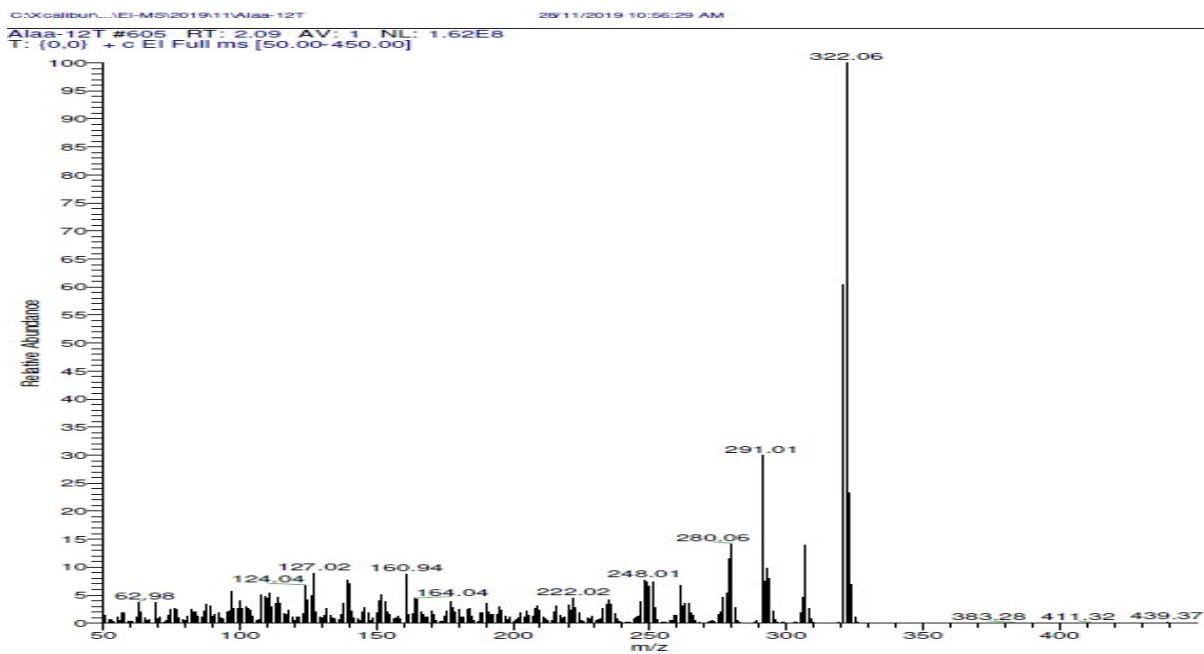

Figure S23. Mass spectrum of compound 3h.

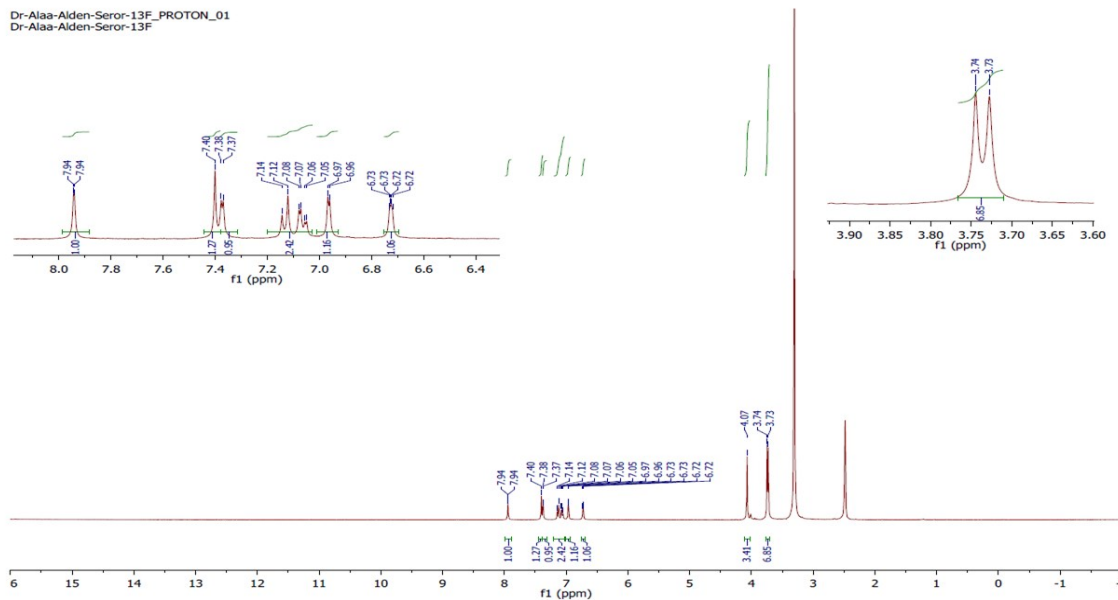

**Figure S24.**  $^1\text{H}$  NMR spectrum of compound **3i**.

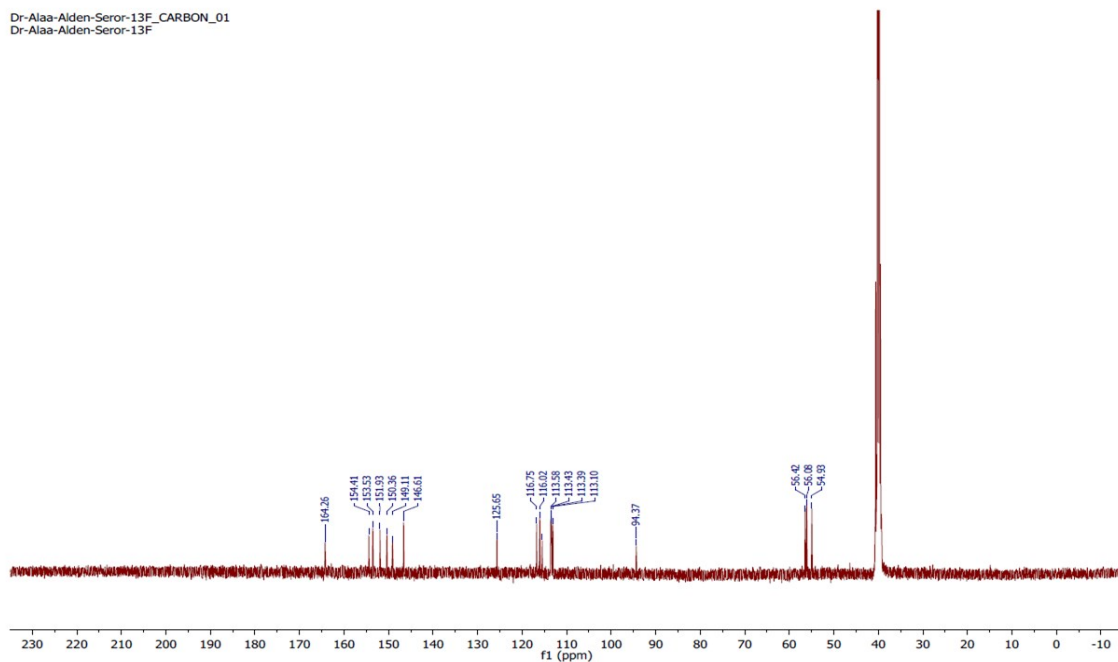

**Figure S25.**  $^{13}\text{C}$  NMR spectrum of compound **3i**.

Alaa-13F #588 RT: 2.03 AV: 1 NL: 6.71E7  
T: {0.0} + c EI Full ms [50.00-450.00]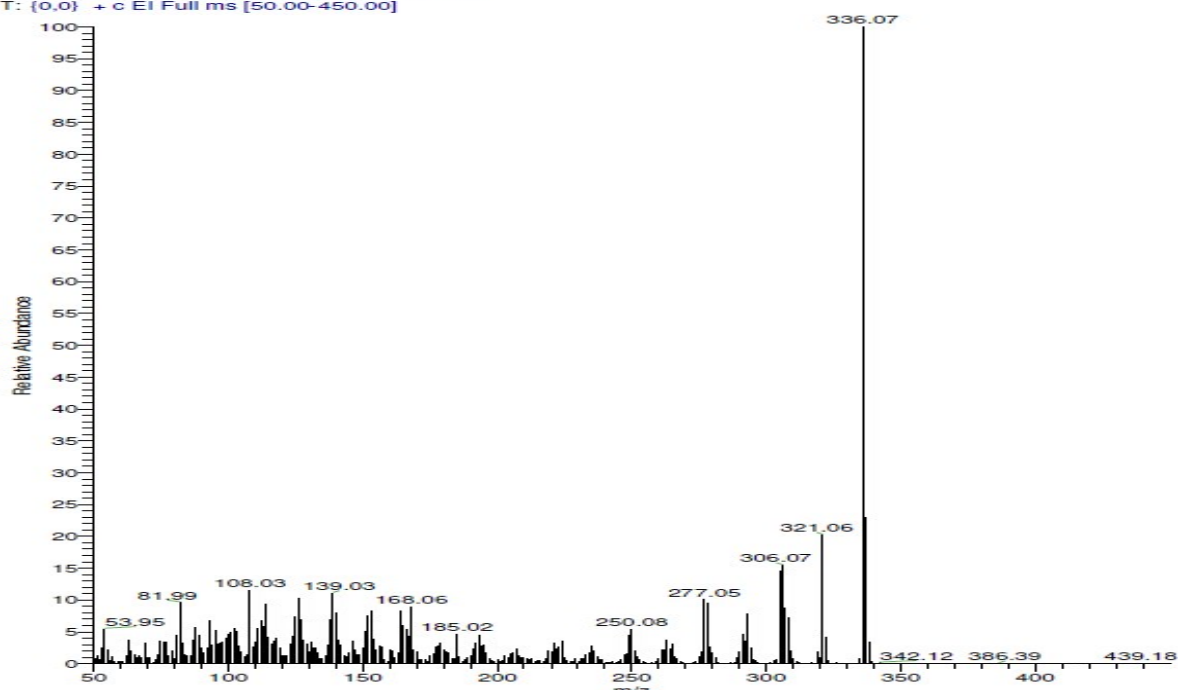

Figure S26. Mass spectrum of compound 3i.

Dr-Alaa-Alden-Seror-13T\_PROTON\_01  
Dr-Alaa-Alden-Seror-13T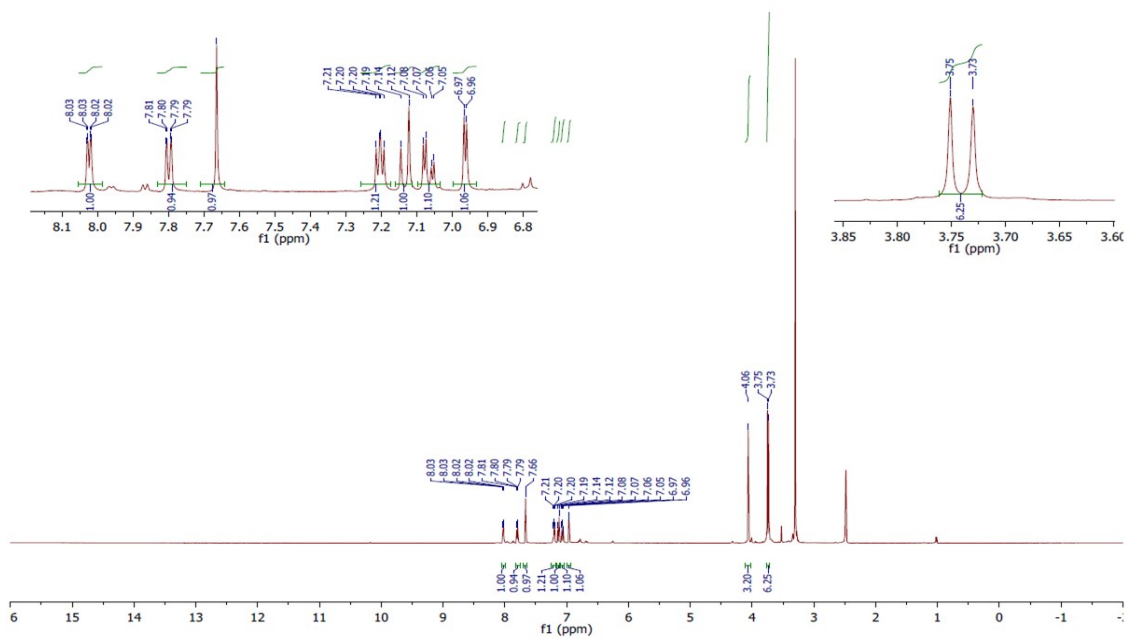Figure S27.  $^1\text{H}$  NMR spectrum of compound 3j.

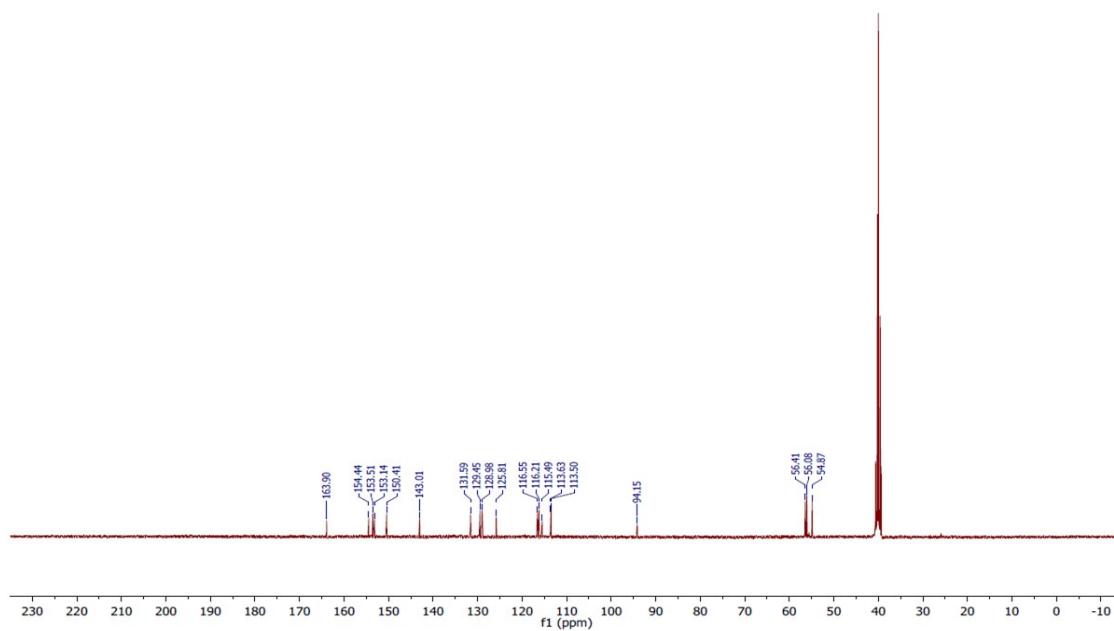

Figure S28. <sup>13</sup>C NMR spectrum of compound 3j.

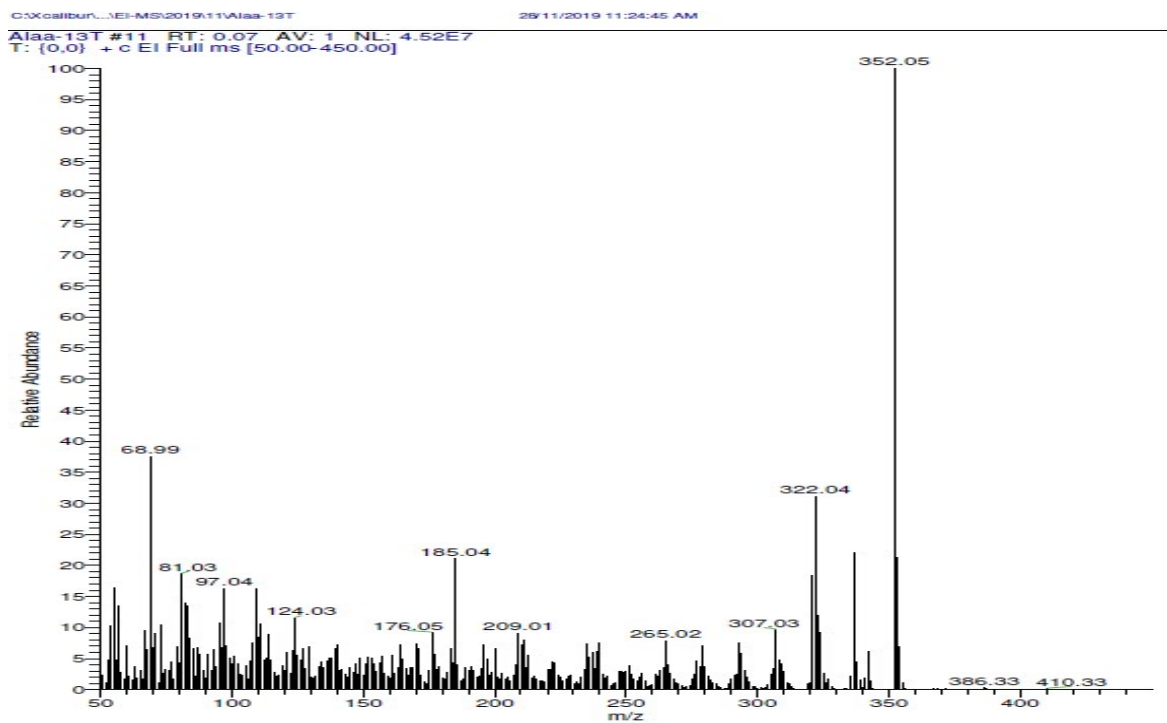

Figure S29. Mass spectrum of compound 3j.



Dr-Alaa-Alden-Seror-14F\_PROTON\_01  
Dr-Alaa-Alden-Seror-14F

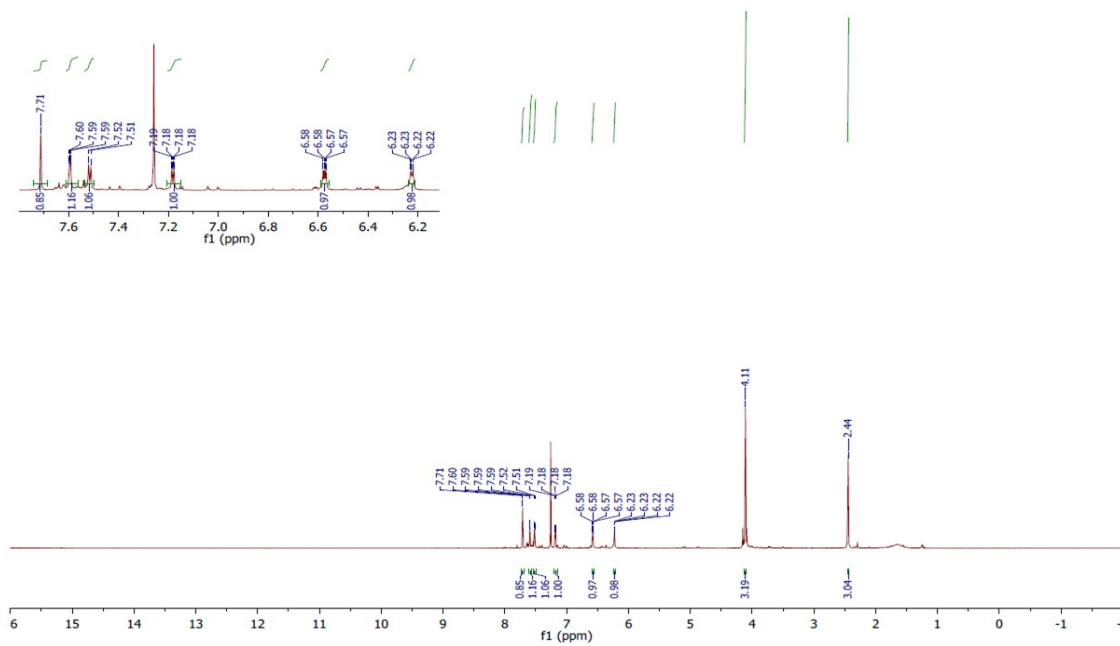

Figure S30. <sup>1</sup>H NMR spectrum of compound 3k.

Dr-Alaa-Alden-Seror-14F\_CARBON\_01  
Dr-Alaa-Alden-Seror-14F

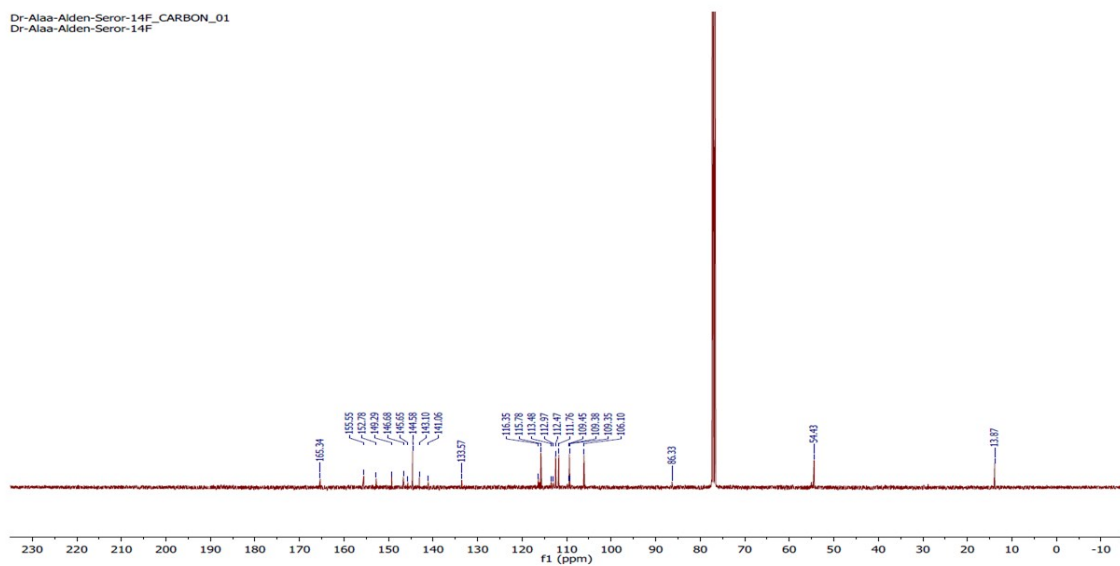

Figure S31. <sup>13</sup>C NMR spectrum of compound 3k.

Alaa-14F #572 RT: 1.98 AV: 1 NL: 1.00E8  
T: {0,0} + c EI Full ms [50.00-450.00]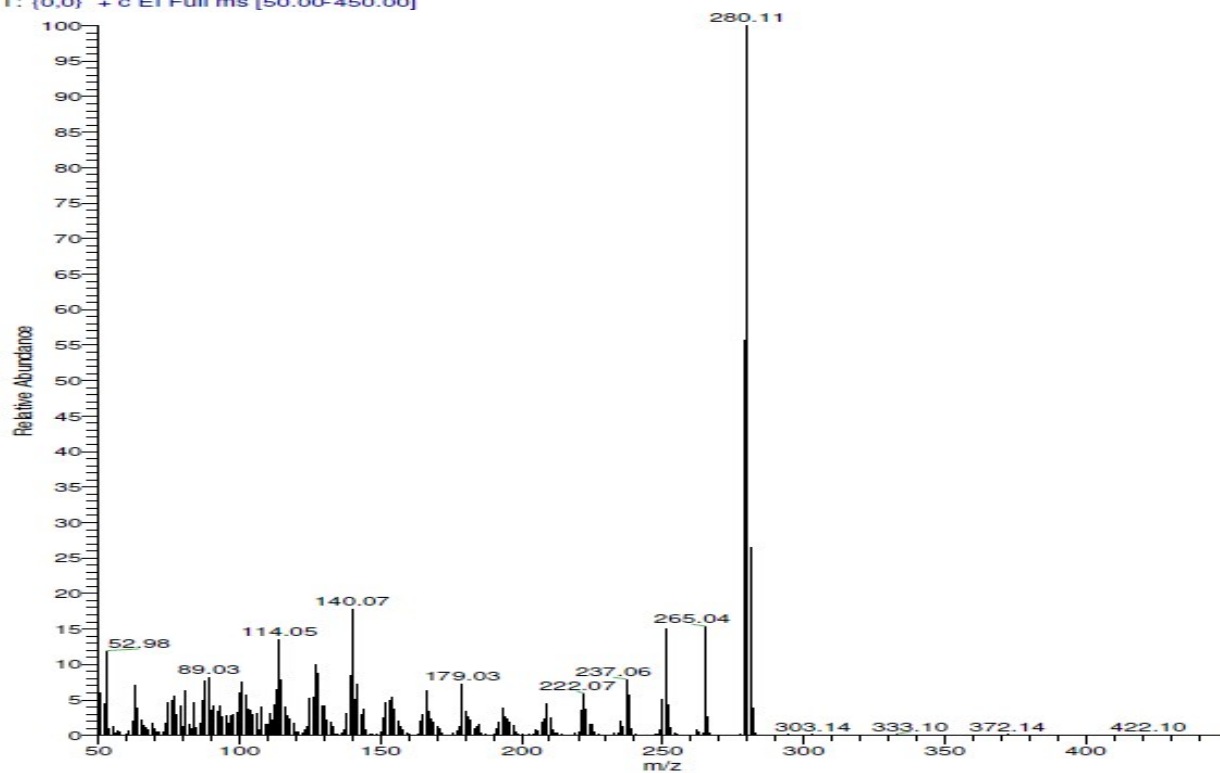

Figure S32. Mass spectrum of compound 3k.

Dr-Alaa-Alden-Seror-14T\_PROTON\_01  
Dr-Alaa-Alden-Seror-14T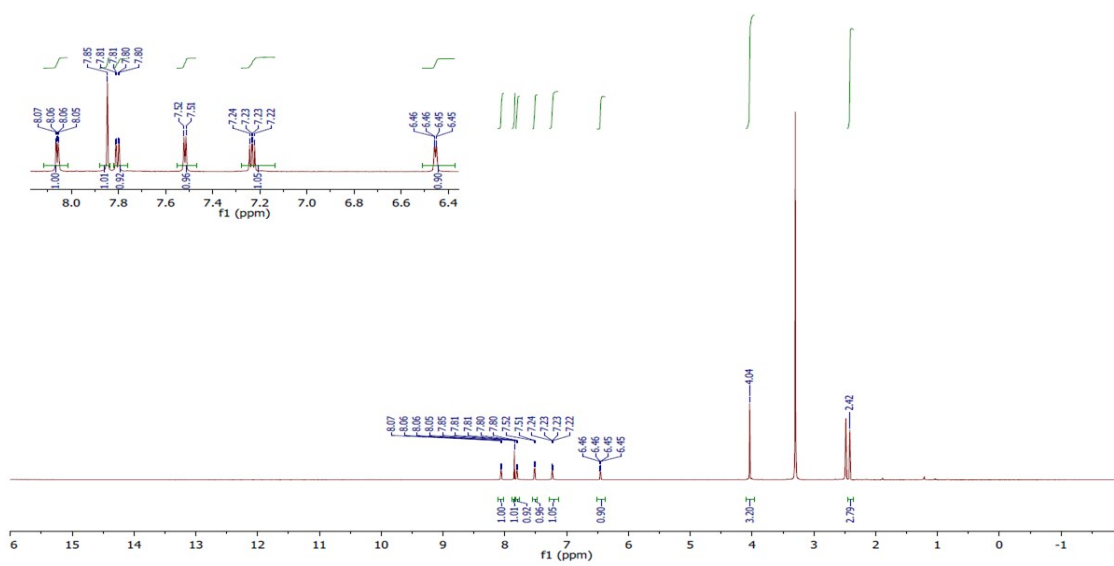Figure S33. <sup>1</sup>H NMR spectrum of compound 3l.

Dr-Alaa-Alden-Seror-14T\_CARBON\_01  
Dr-Alaa-Alden-Seror-14T

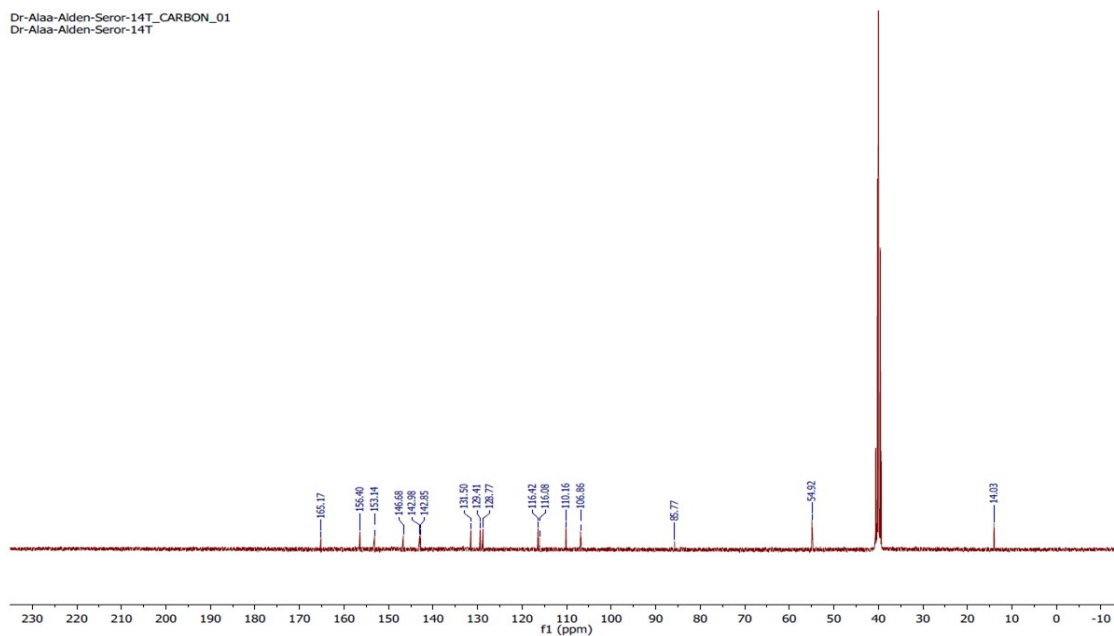

Figure S34.  $^{13}\text{C}$  NMR spectrum of compound 31.

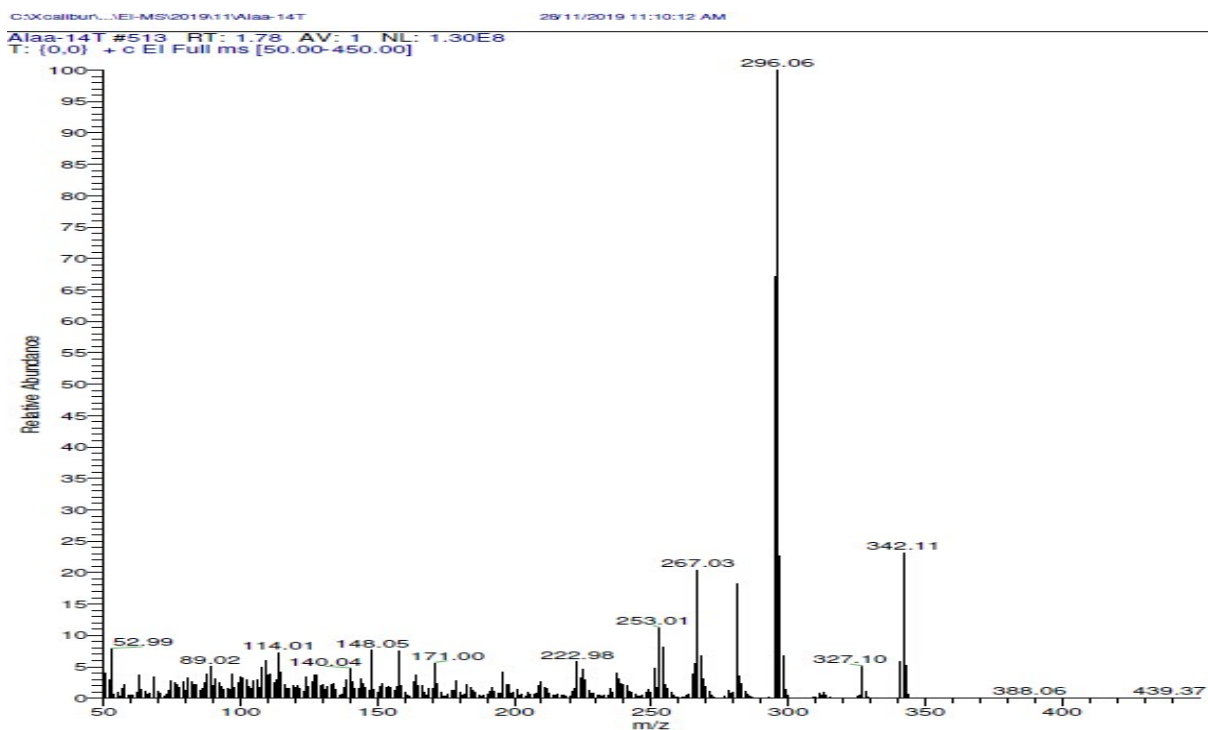

Figure S35. Mass spectrum of compound 31.

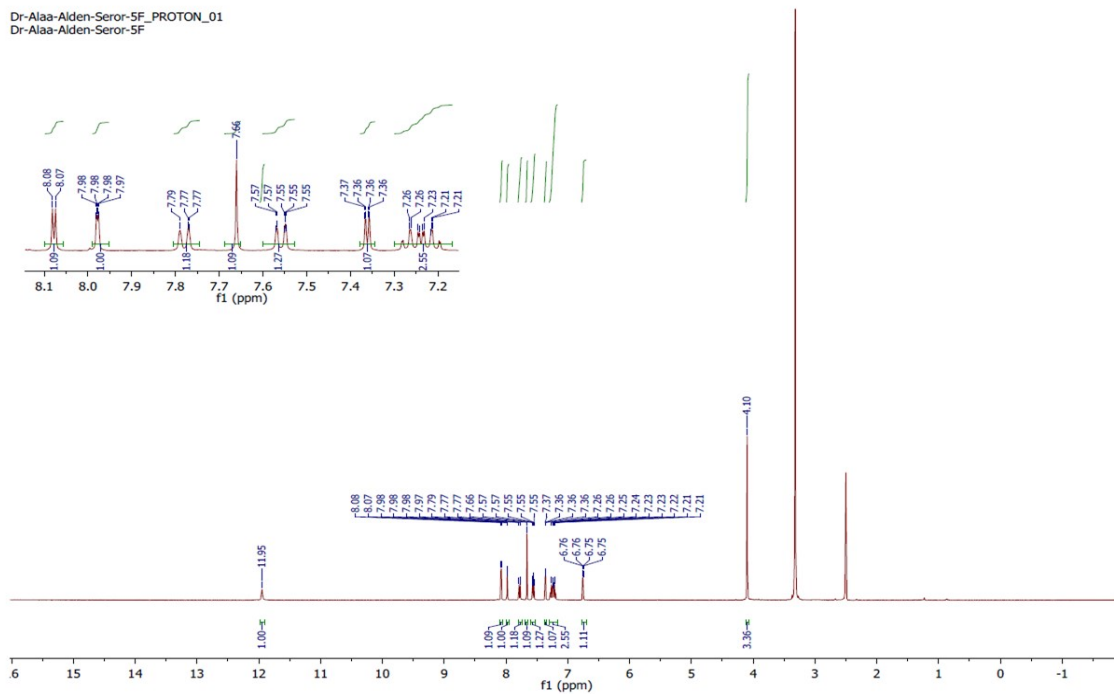

Figure S36.  $^1\text{H}$  NMR spectrum of compound **3m**.

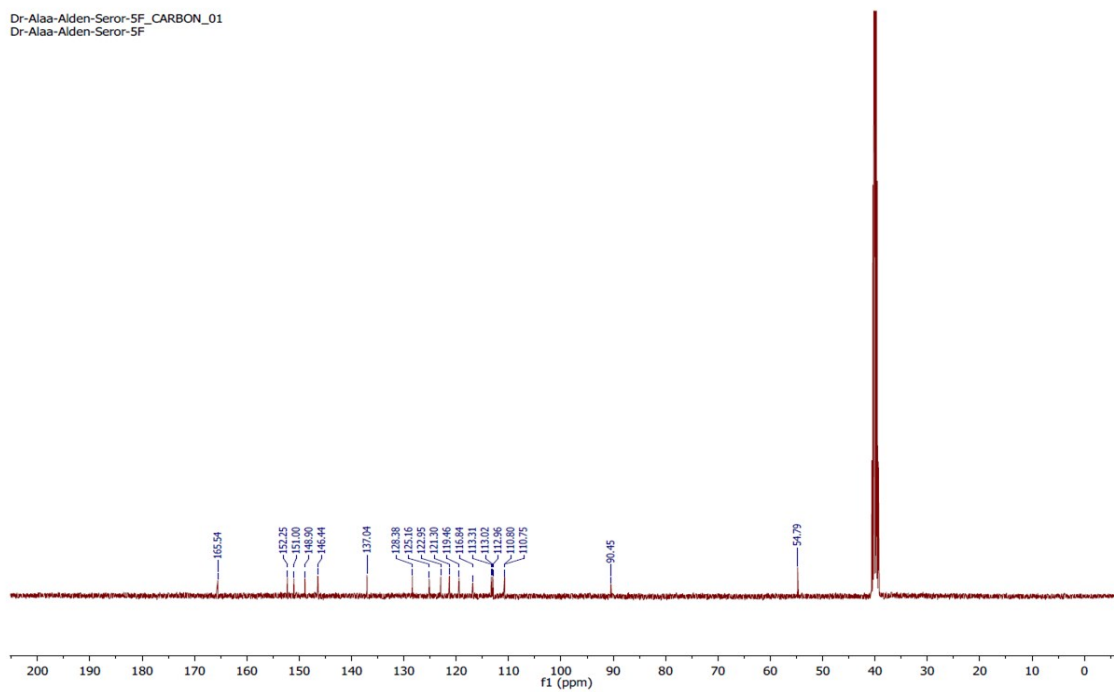

Figure S37.  $^{13}\text{C}$  NMR spectrum of compound **3m**.

Alaa-5F #942 RT: 3.23 AV: 1 NL: 9.92E6  
T: {0,0} + c EI Full ms [50.00-450.00]

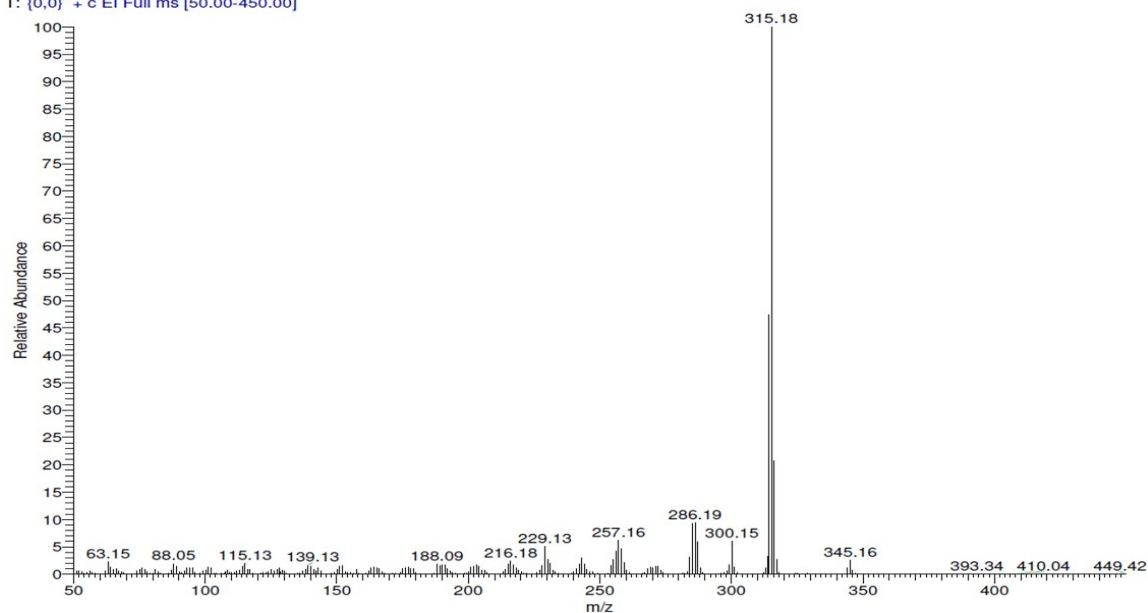

Figure S38. Mass spectrum of compound 3m.

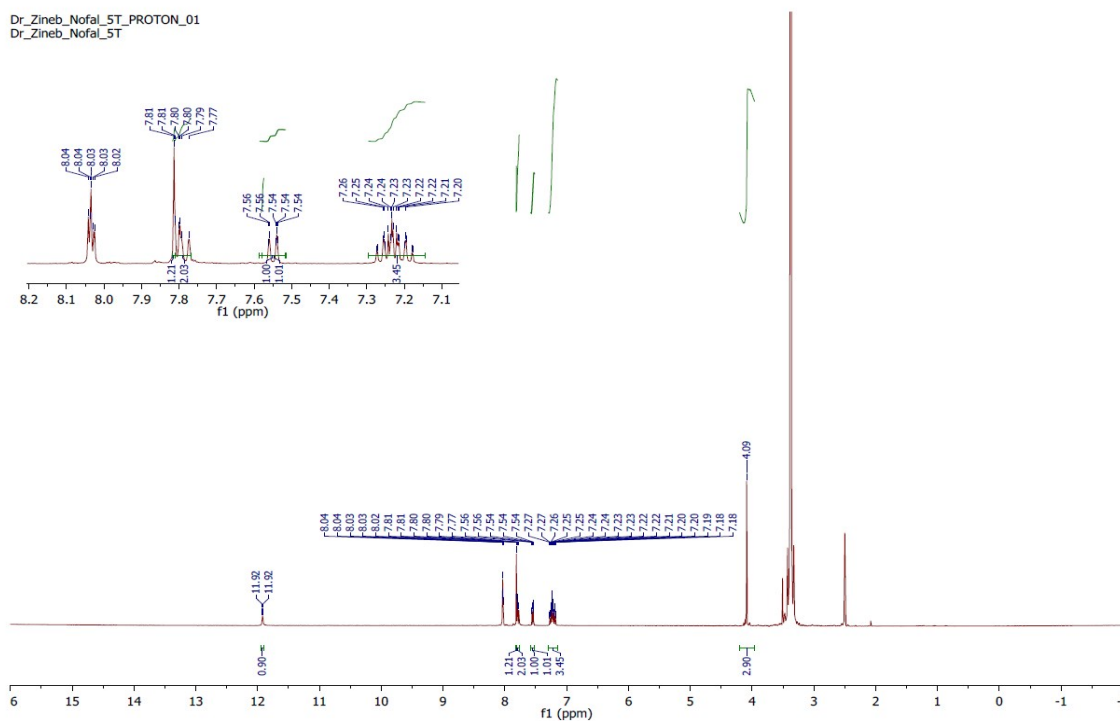

Figure S39. <sup>1</sup>H NMR spectrum of compound 3n.

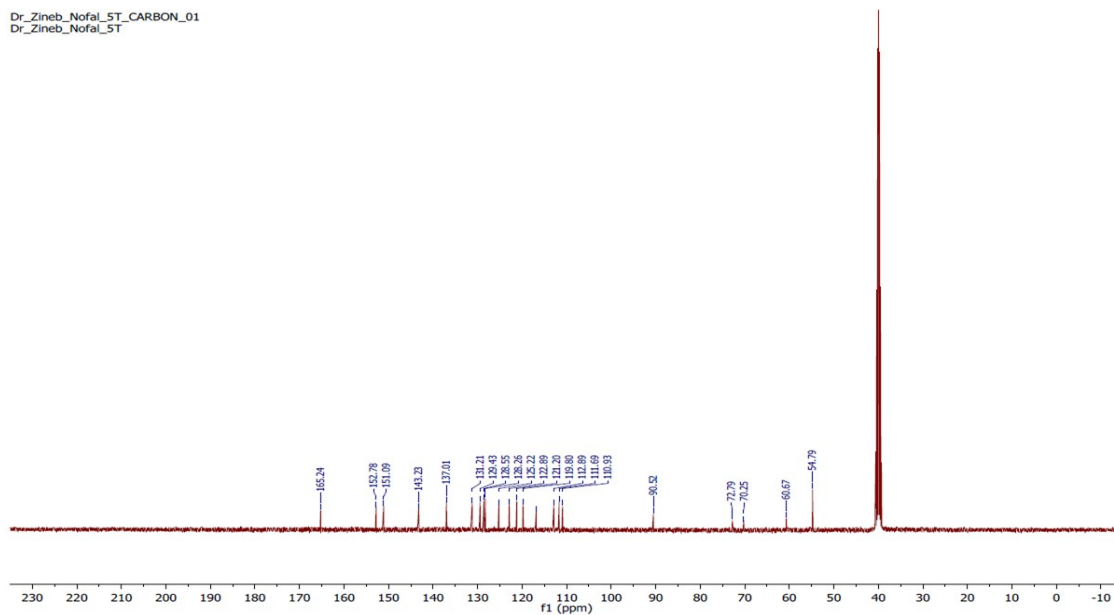

Figure S40. <sup>13</sup>C NMR spectrum of compound 3n.

Alaa-5T #988 RT: 3.39 AV: 1 NL: 1.08E5  
T: {0,0} + c EI Full ms [50.00-450.00]

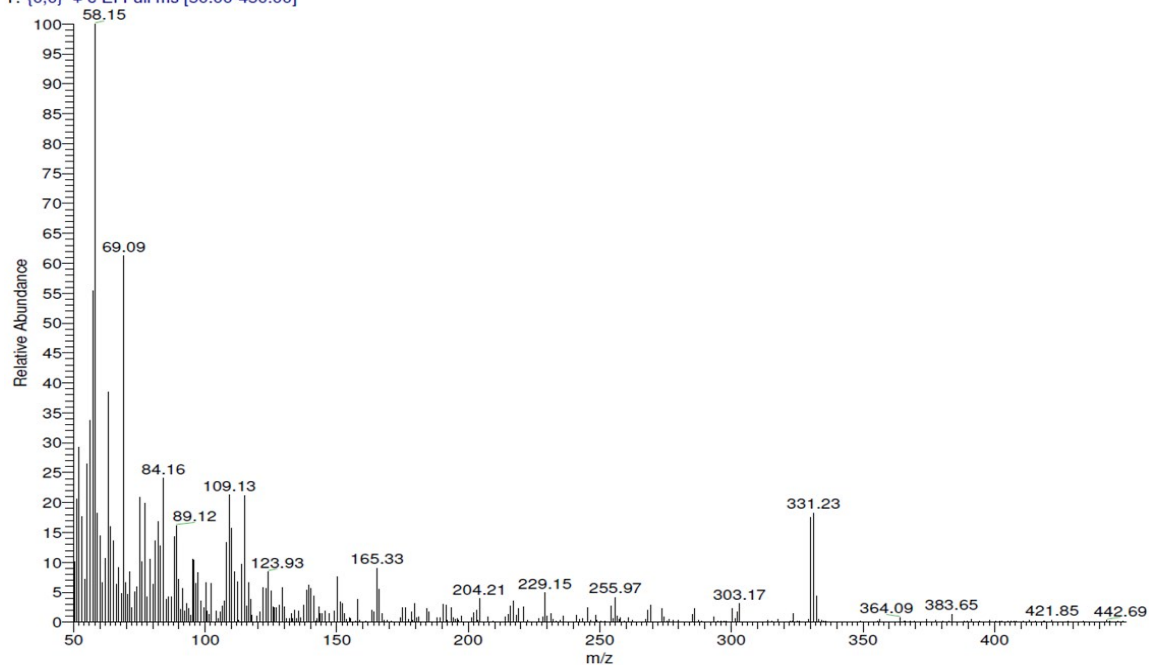

Figure S41. Mass spectrum of compound 3n.

Dr\_Zineb\_Nofal\_6p\_PROTON\_01  
Dr\_Zineb\_Nofal\_6p

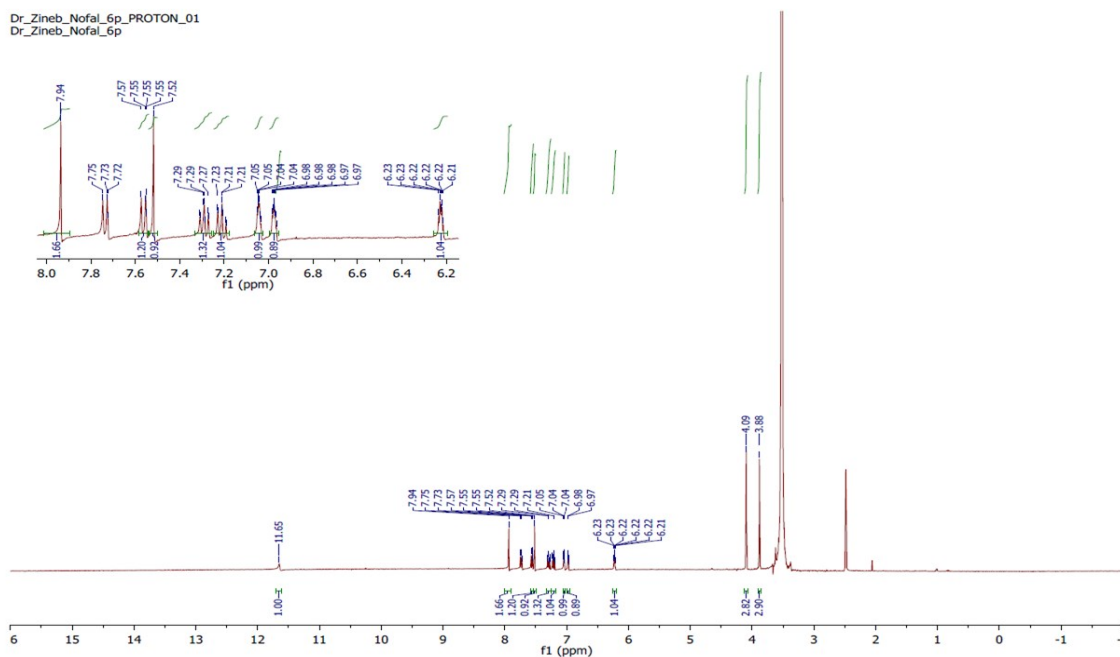

Figure S42. <sup>1</sup>H NMR spectrum of compound **3o**.

Dr\_Zineb\_Nofal\_6p\_CARBON\_01  
Dr\_Zineb\_Nofal\_6p

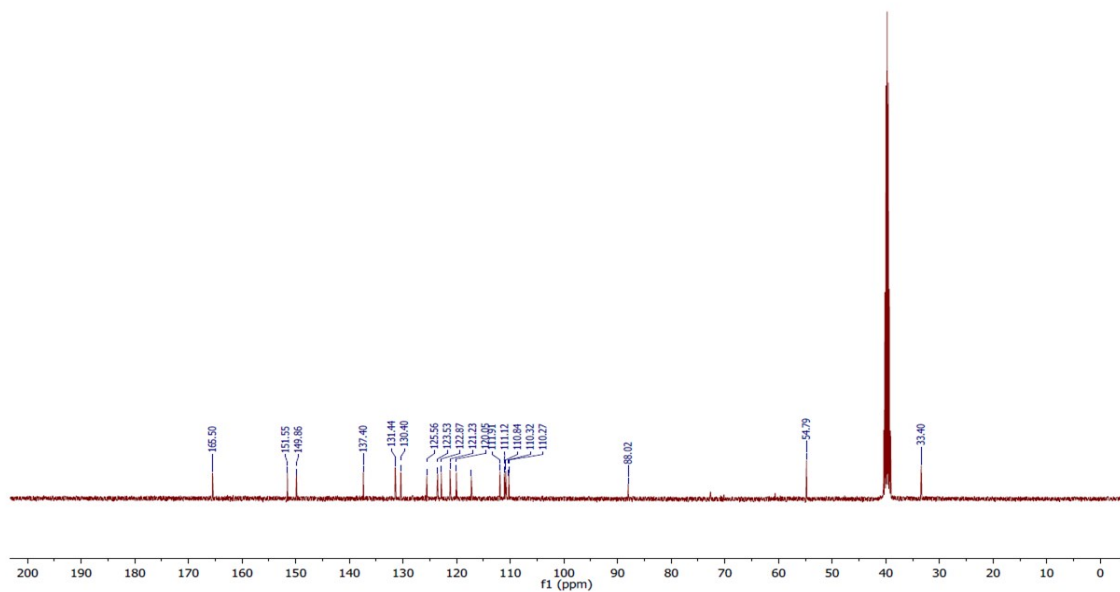

Figure S43. <sup>13</sup>C NMR spectrum of compound **3o**.

Alaa-6P #895 RT: 3.07 AV: 1 NL: 9.15E4  
T: {0,0} + c EI Full ms [50.00-450.00]

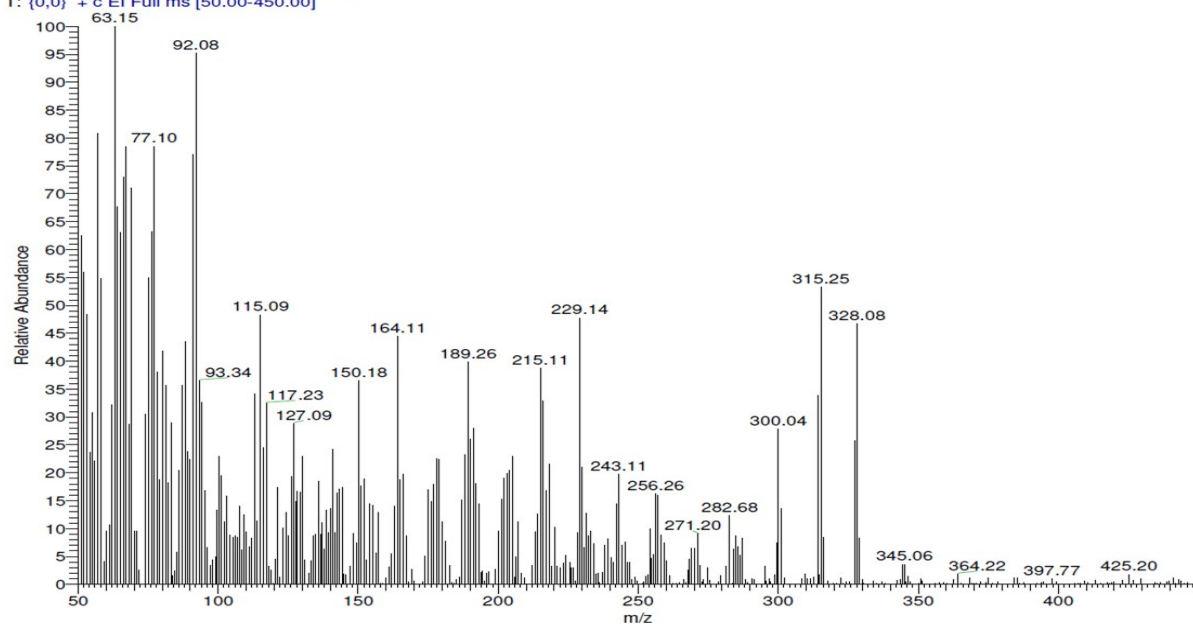

Figure S44. Mass spectrum of compound 3o.

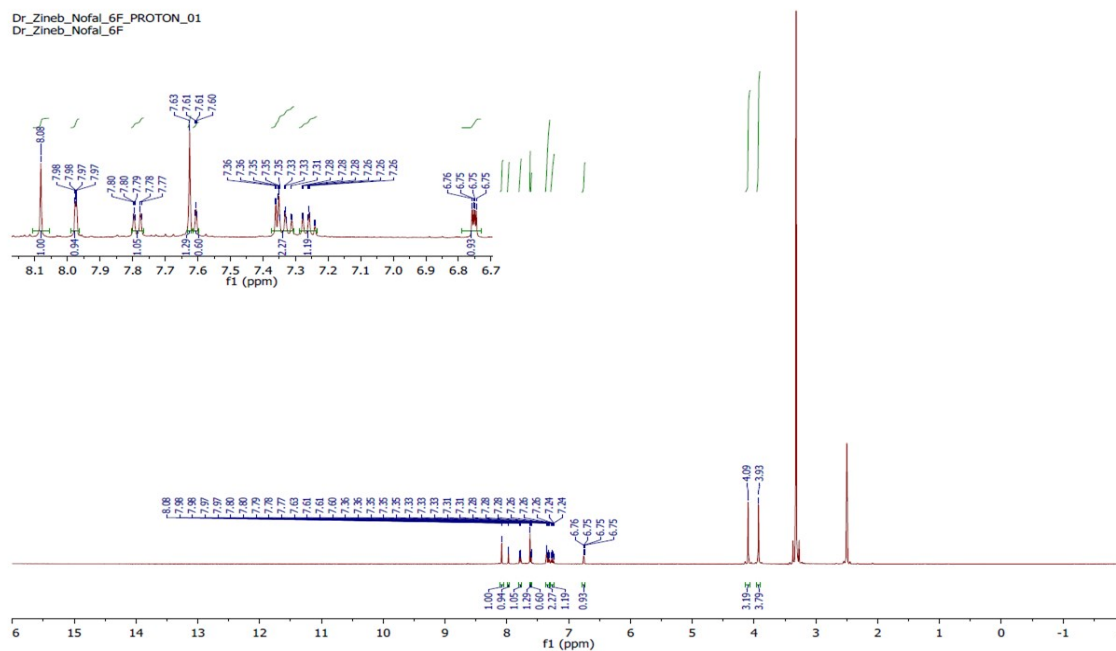

Figure S45. <sup>1</sup>H NMR spectrum of compound 3p.



Dr-Alaa-Alden-Seror-6F\_CARBON\_01  
Dr-Alaa-Alden-Seror-6F

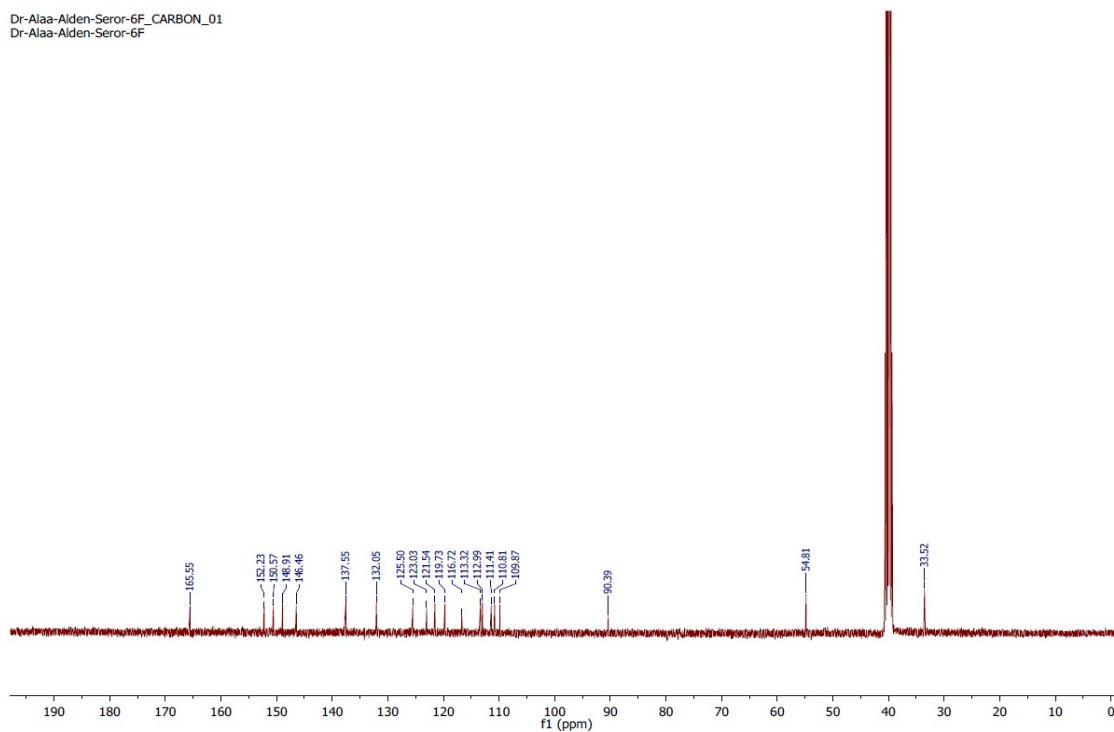

Figure S46.  $^{13}\text{C}$  NMR spectrum of compound **3p**.

C:\Xcalibur\...EI-MSI\2018\1\Alaa-6F

12/12/2018 9:13:16 AM

Alaa-6F #844 RT: 2.90 AV: 1 NL: 8.72E6  
T: {0,0} + c EI Full ms [50.00-450.00]

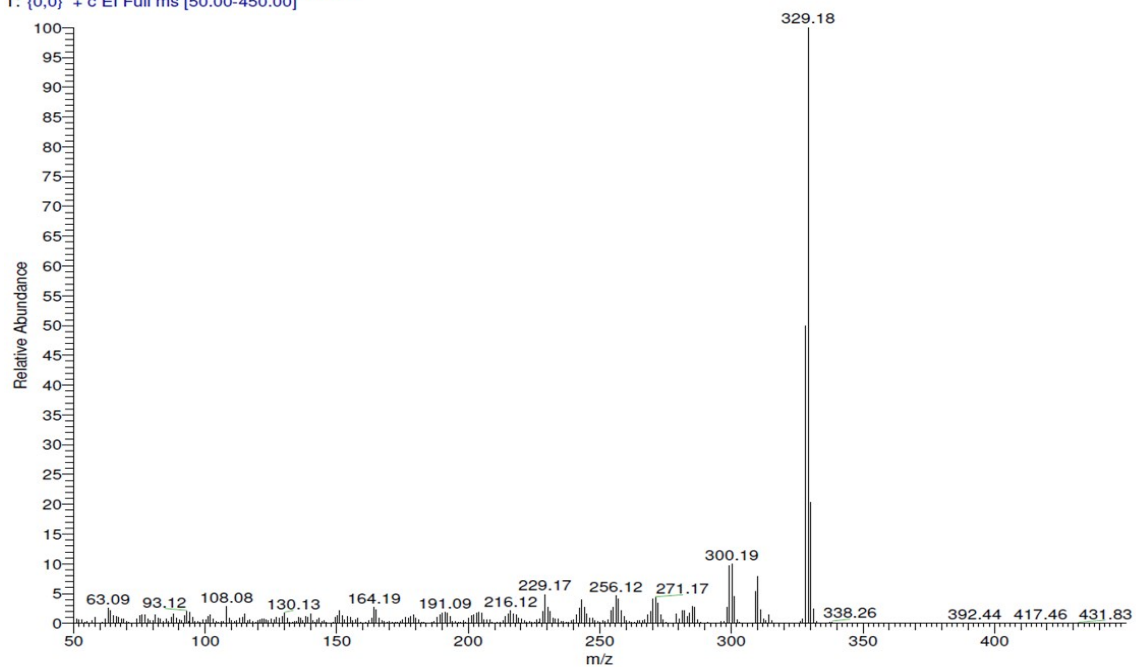

Figure S47. Mass spectrum of compound **3p**.

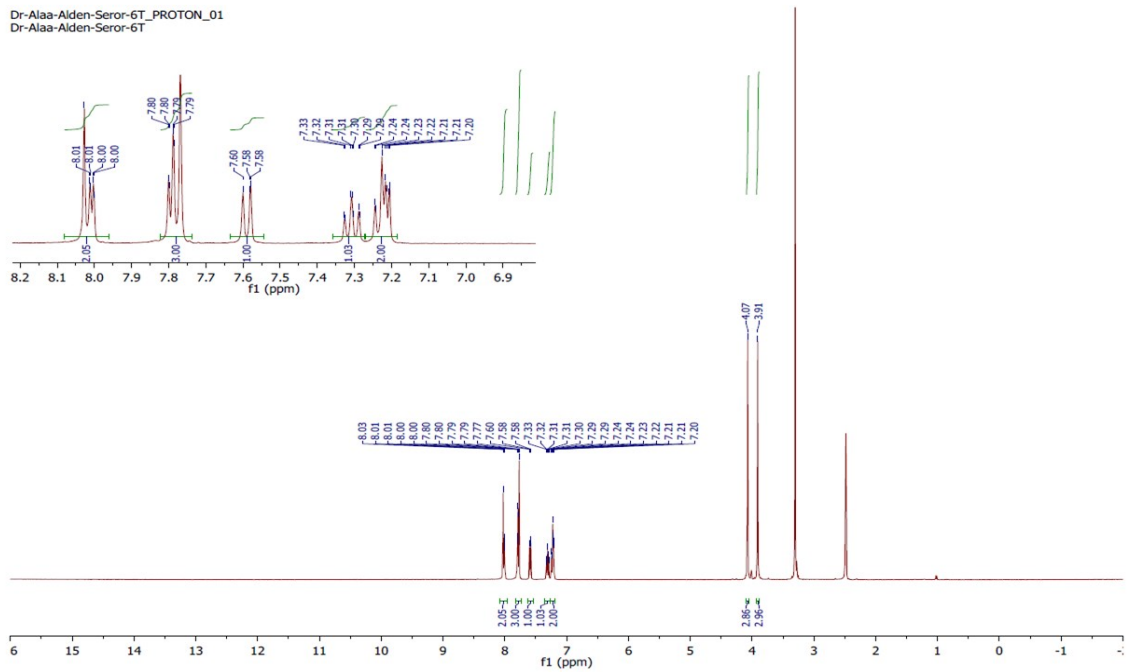

Figure S48. <sup>1</sup>H NMR spectrum of compound **3q**.

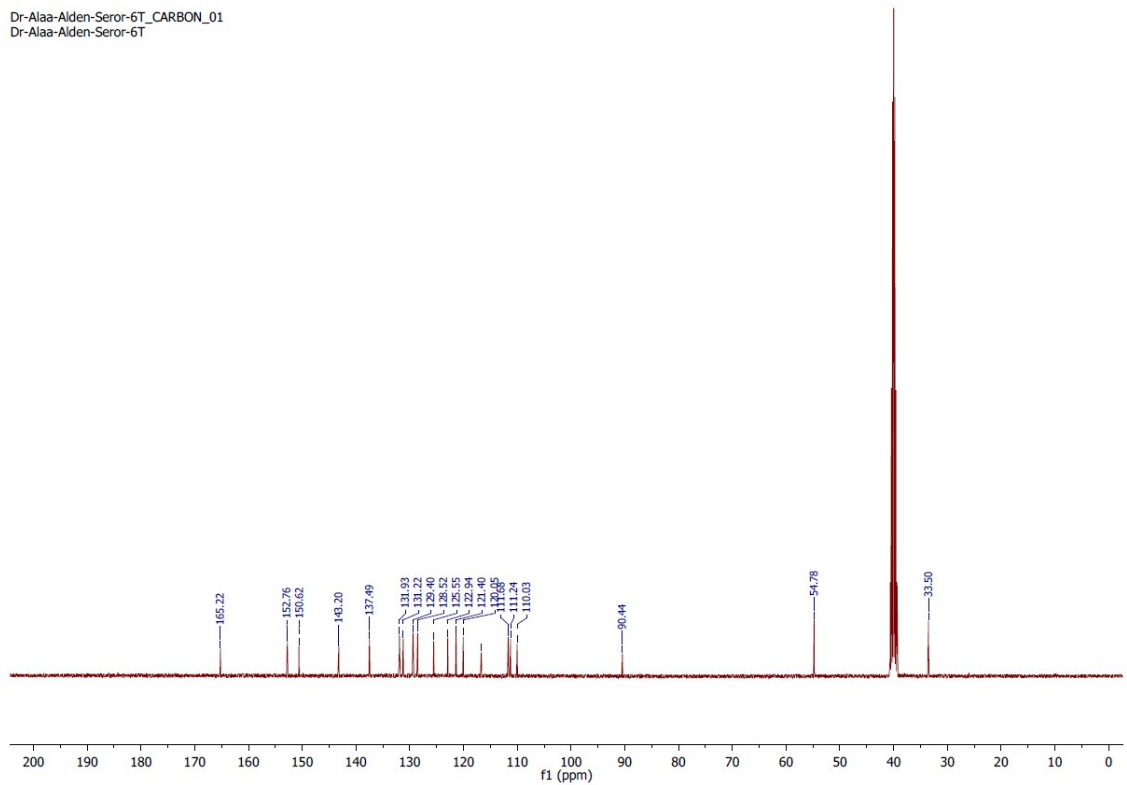

Figure S49. <sup>13</sup>C NMR spectrum of compound **3q**.

Alaa-6T #883 RT: 3.03 AV: 1 NL: 1.45E7  
T: [0,0] + c EI Full ms [50.00-450.00]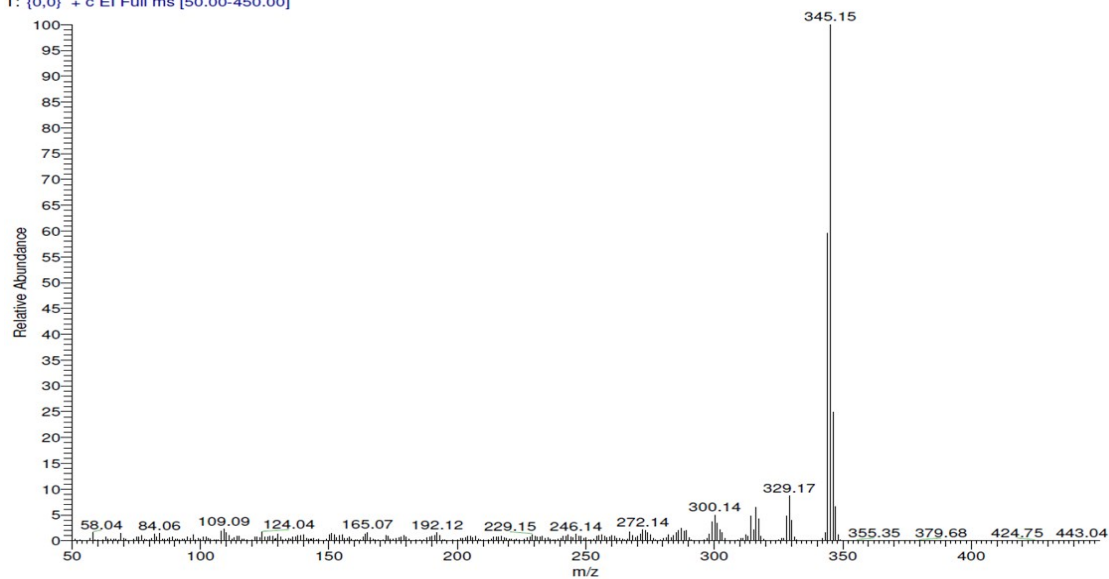

Figure S50. Mass spectrum of compound 3q.

Dr\_Zineb\_Nofal\_7P\_PROTON\_01  
Dr\_Zineb\_Nofal\_7P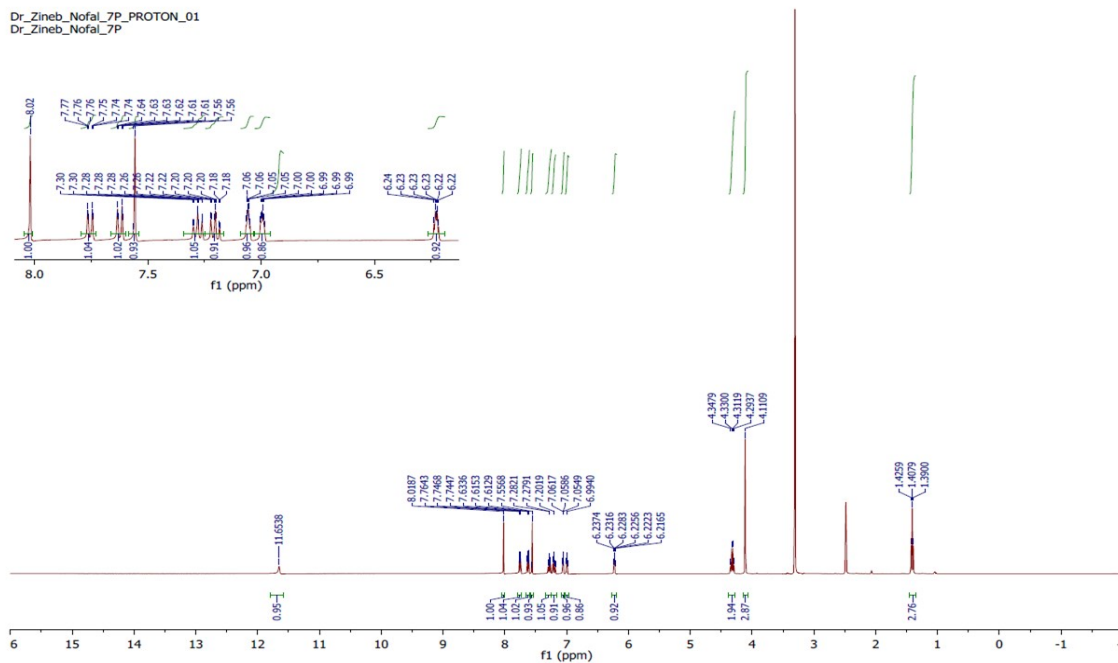Figure S51. <sup>1</sup>H NMR spectrum of compound 3r.

Dr\_Zineb\_Nofal\_7P\_CARBON\_01  
Dr\_Zineb\_Nofal\_7P

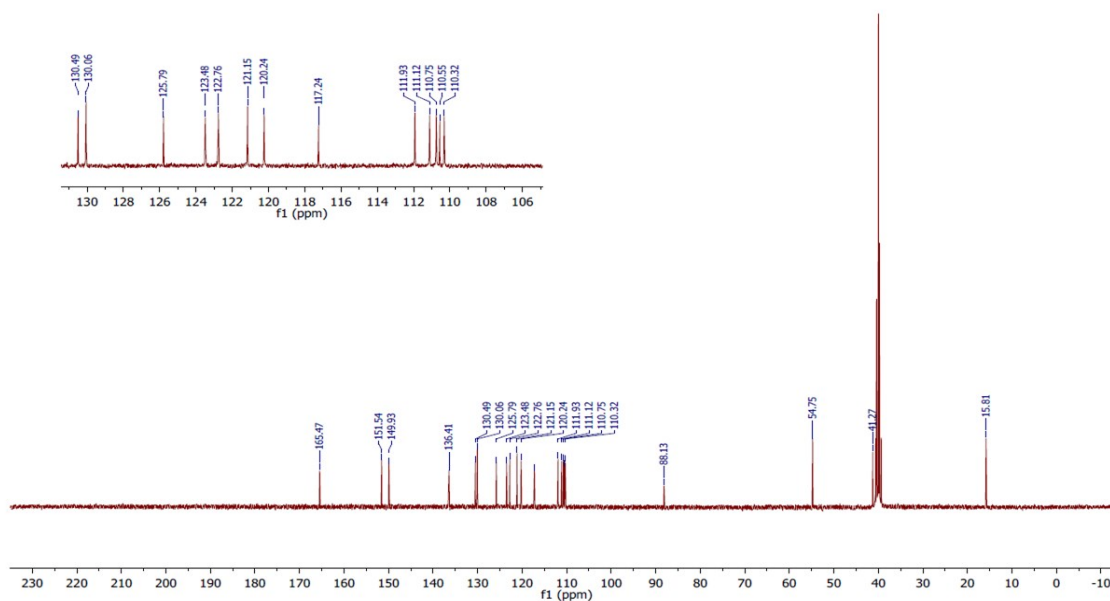

Figure S52. <sup>13</sup>C NMR spectrum of compound 3r.

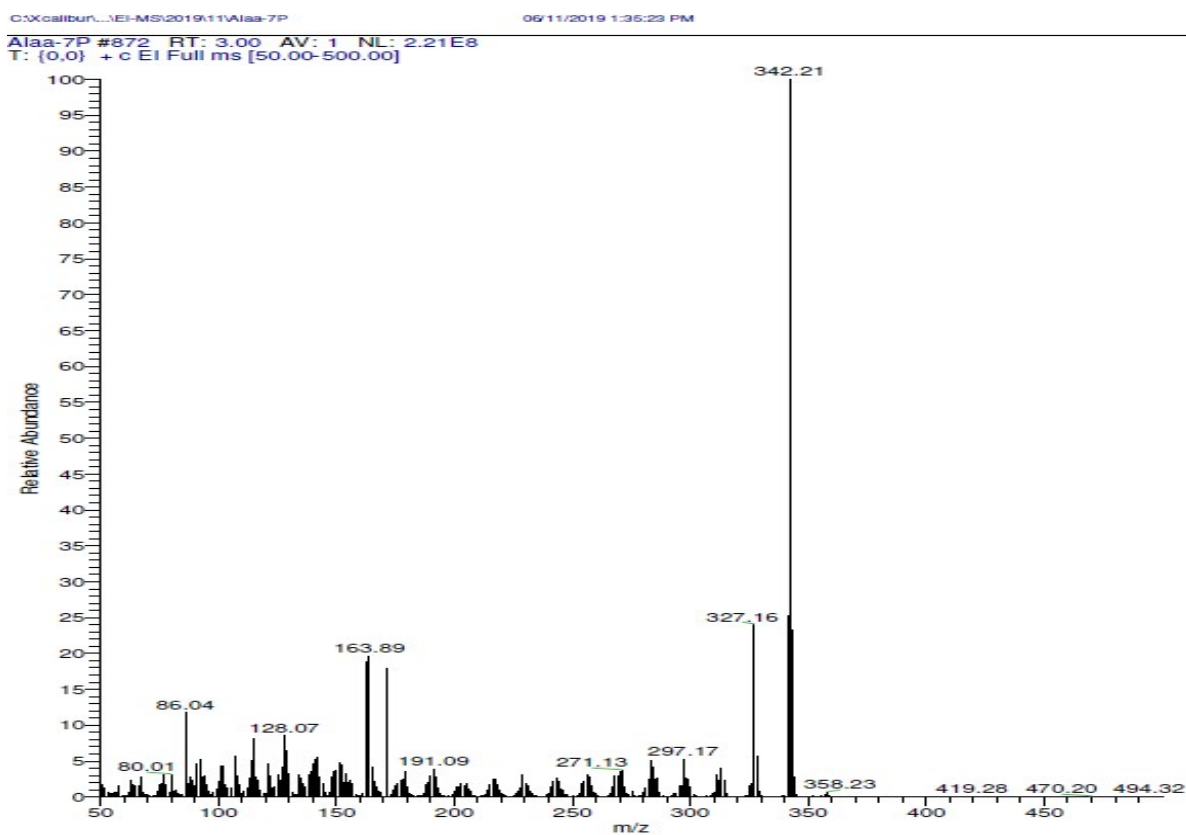

Figure S53. Mass spectrum of compound 3r.

Dr-Alaa-Alden-Seror-7F\_PROTON\_01  
Dr-Alaa-Alden-Seror-7F

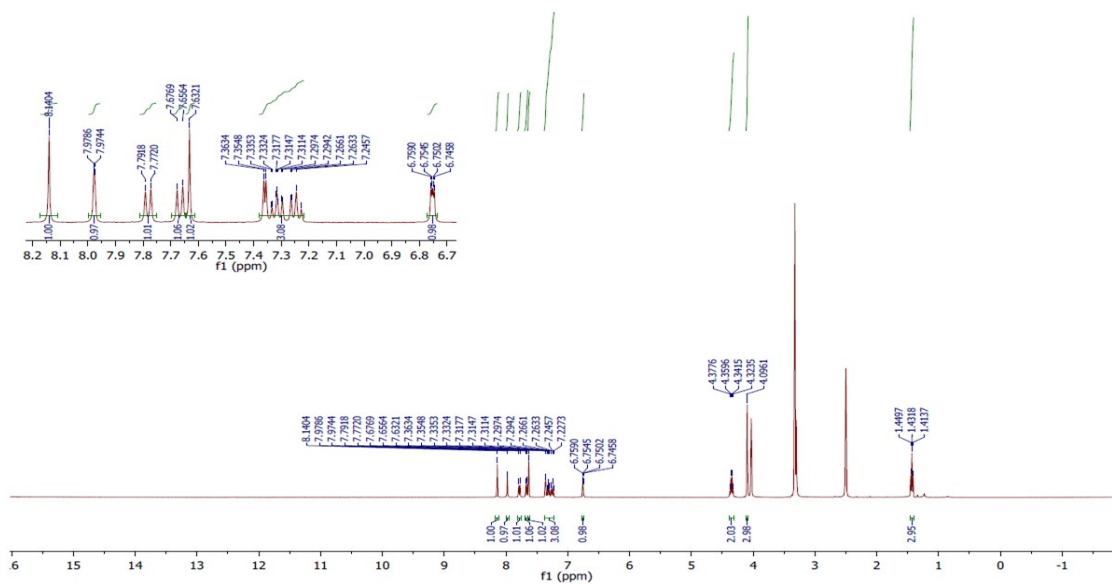

Figure S54. <sup>1</sup>H NMR spectrum of compound 3s.

Dr-Alaa-Alden-Seror-7F\_CARBOON\_01  
Dr-Alaa-Alden-Seror-7F

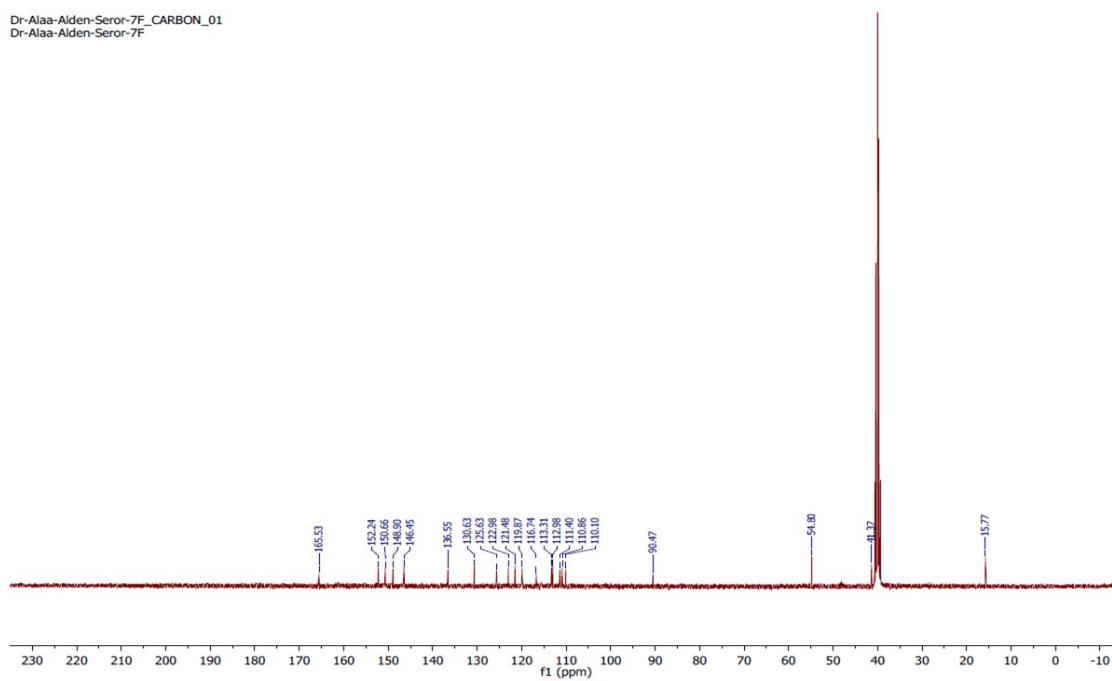

Figure S55. <sup>13</sup>C NMR spectrum of compound 3s.

Alaa-7F #777 RT: 2.67 AV: 1 NL: 3.60E7  
T: {0,0} + c EI Full ms [50.00-450.00]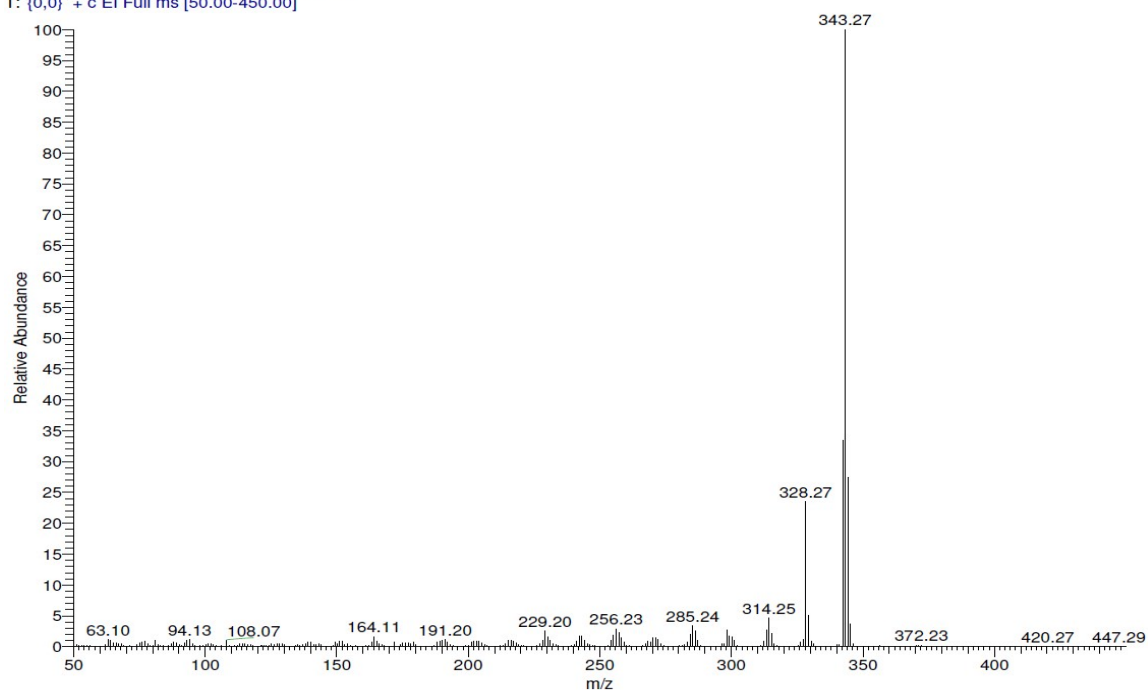

Figure S56. Mass spectrum of compound 3s.

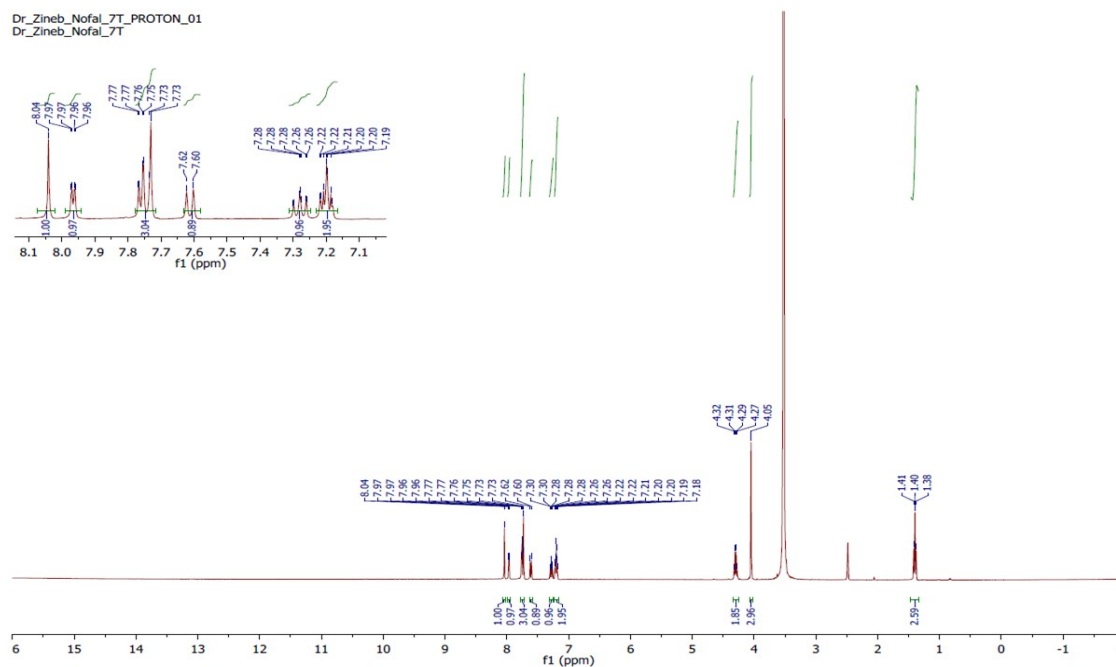Figure S57. <sup>1</sup>H NMR spectrum of compound 3t.

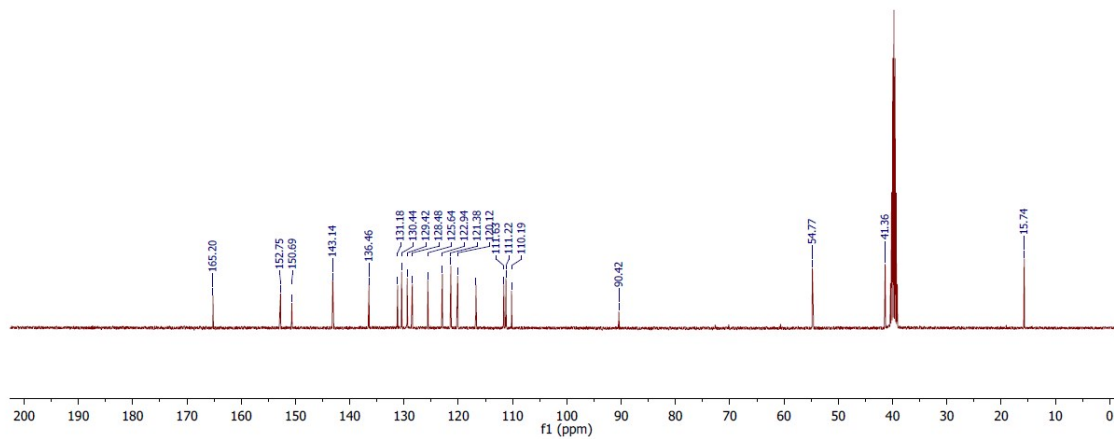

Figure S58.  $^{13}\text{C}$  NMR spectrum of compound **3t**.

Alaa-7T #711 RT: 2.45 AV: 1 NL: 2.30E6  
T: {0,0} + c EI Full ms [50.00-450.00]

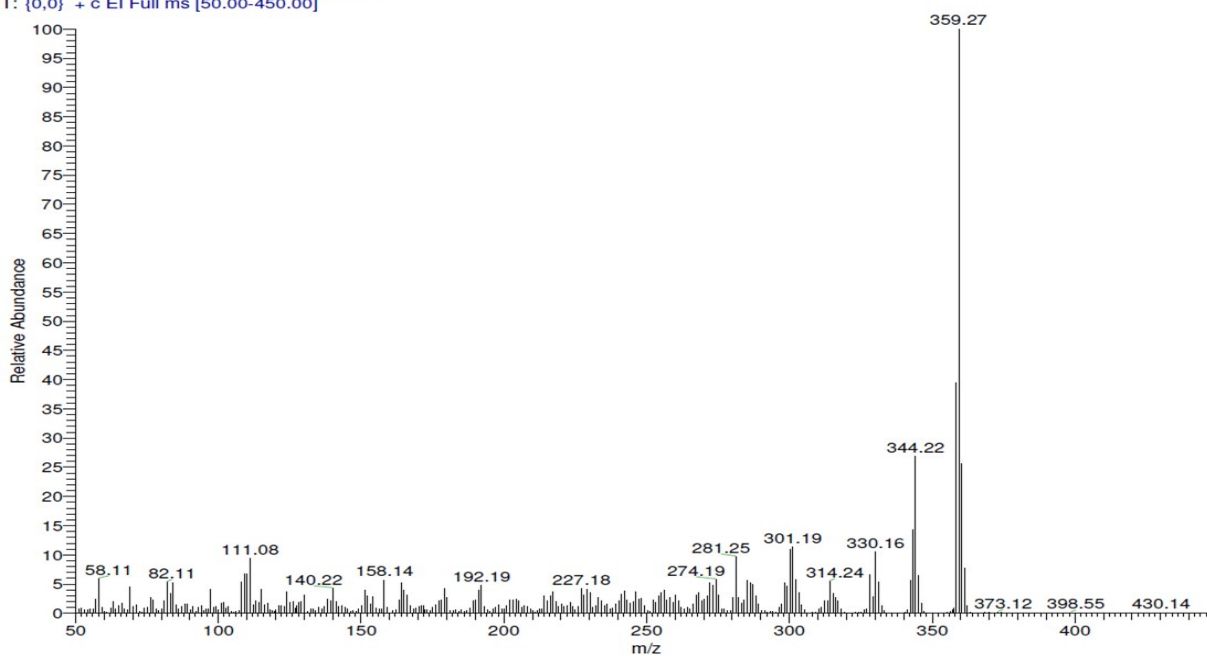

Figure S59. Mass spectrum of compound **3t**.

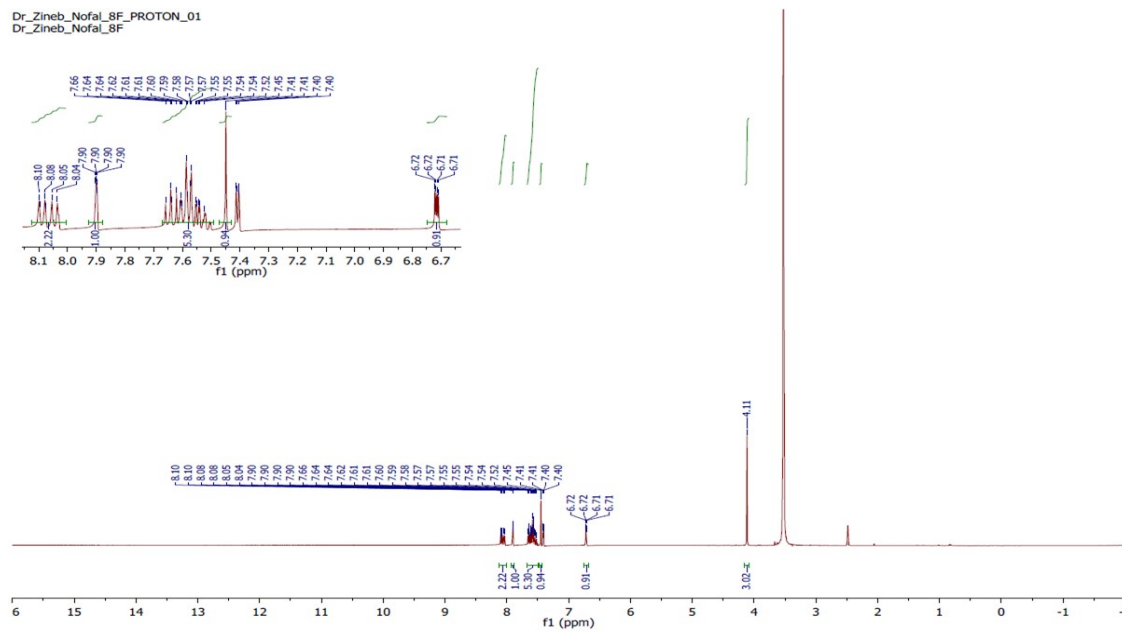

**Figure S60.**  $^1\text{H}$  NMR spectrum of compound **3u**.

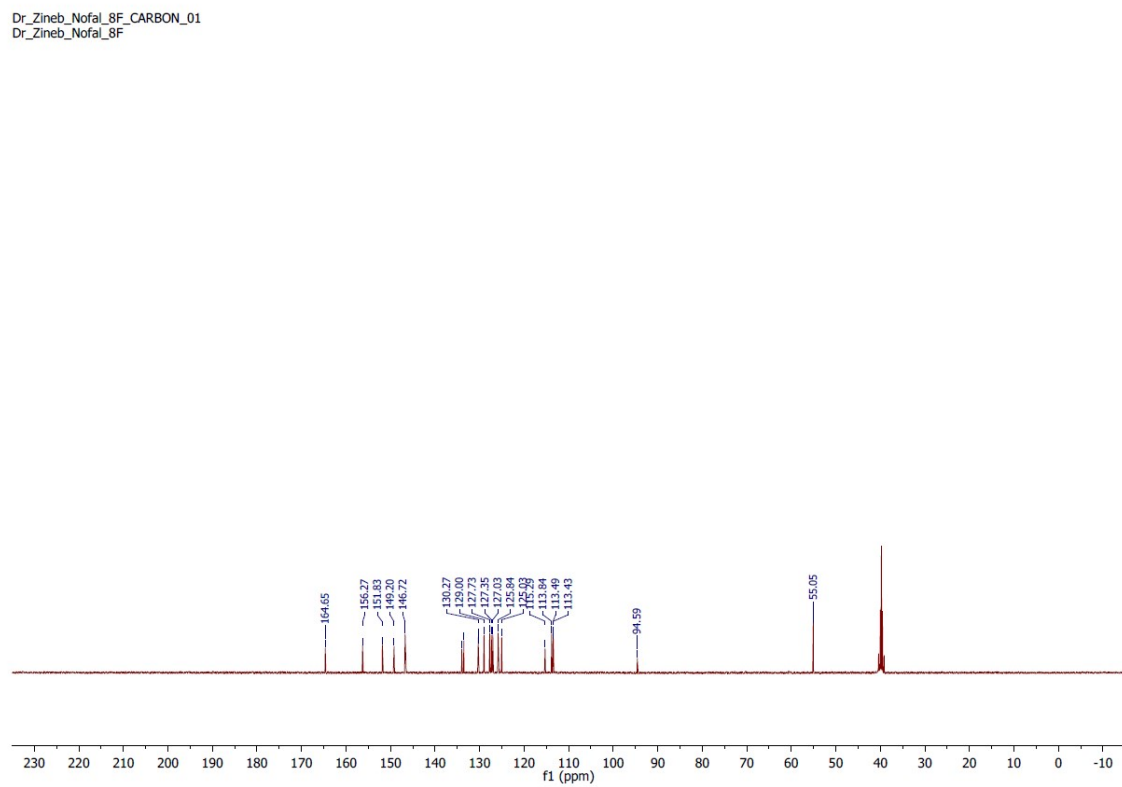

**Figure S61.**  $^{13}\text{C}$  NMR spectrum of compound **3u**.



Alaa-8F #678 RT: 2.34 AV: 1 NL: 1.11E7  
T: {0,0} + c EI Full ms [50.00-450.00]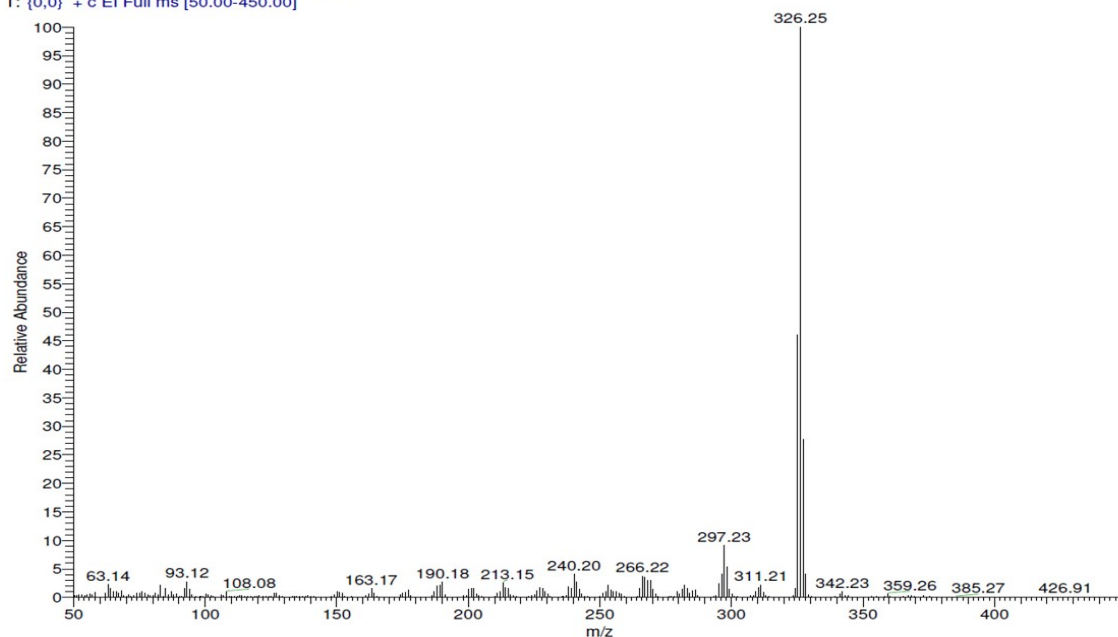

Figure S62. Mass spectrum of compound 3u.

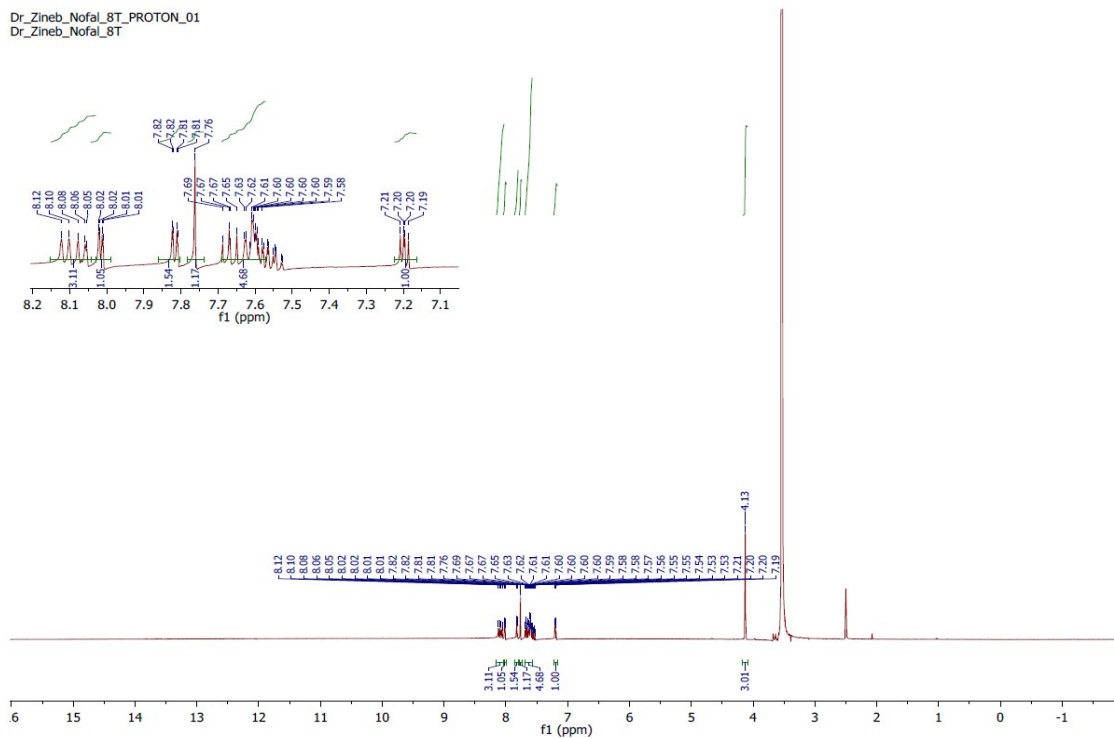Figure S63. <sup>1</sup>H NMR spectrum of compound 3v.

Dr\_Zineb\_Nofal\_8T\_CARBON\_01  
Dr\_Zineb\_Nofal\_8T

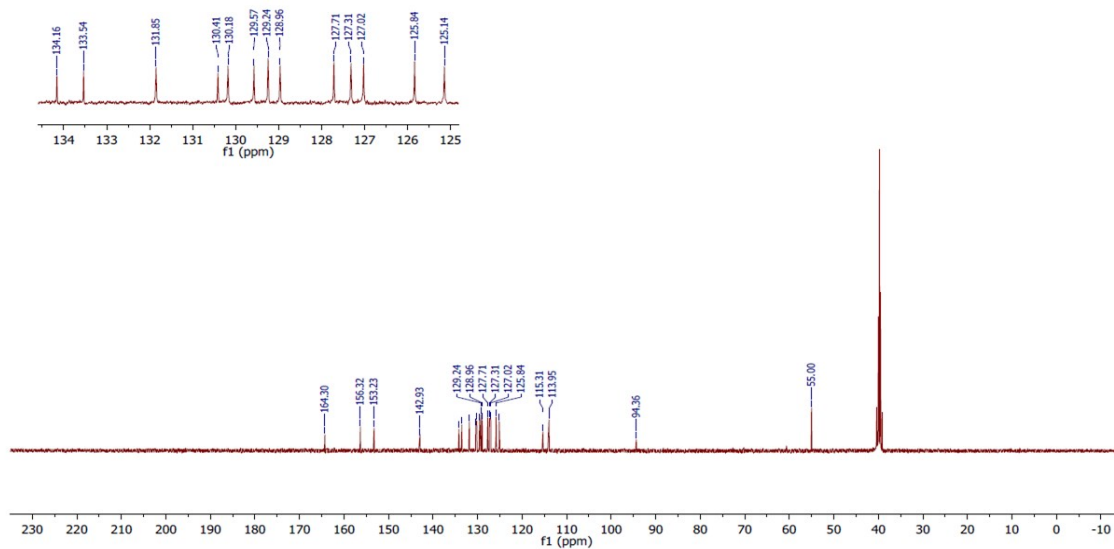

Figure S64.  $^{13}\text{C}$  NMR spectrum of compound **3v**.

C:\Xcalibur\...EI-MS\2018\1\Alaa-8T

11/29/2018 9:44:47 AM

Alaa-8T #795 RT: 2.73 AV: 1 NL: 8.42E6  
T: {0,0} + c EI Full ms [50.00-450.00]

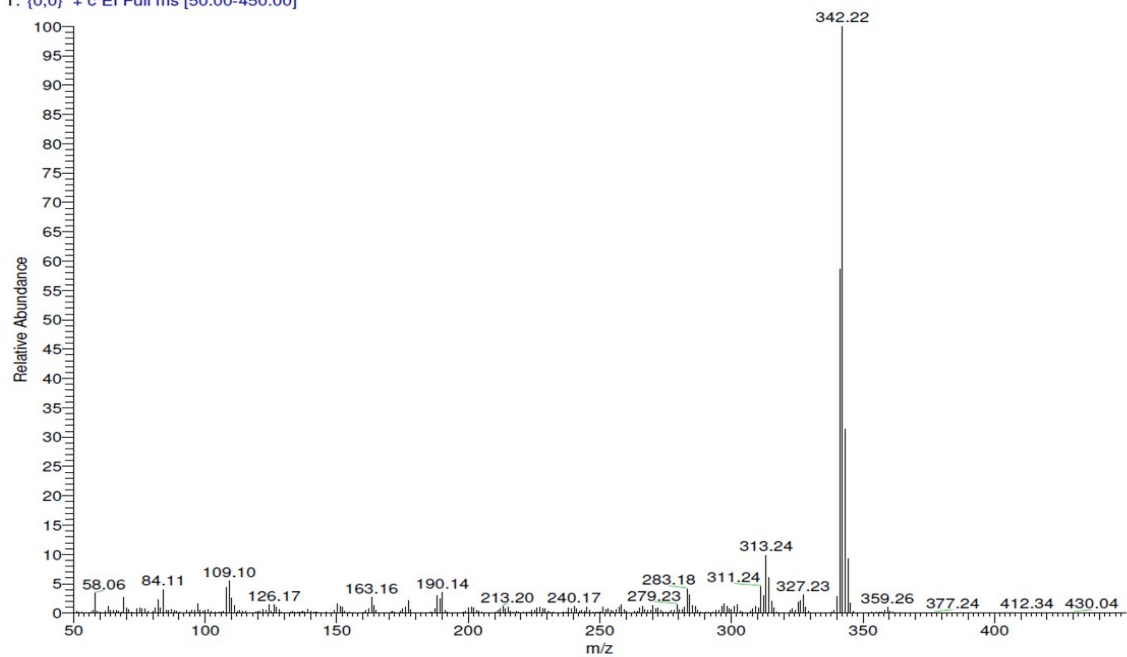

Figure S65. Mass spectrum of compound **3v**.

- [1] M.N. Aziz, S.S. Panda, E.M. Shalaby, N.G. Fawzy, A.S. Girgis, Facile synthetic approach towards vasorelaxant active 4-hydroxyquinazoline-4-carboxamides, *RSC Adv.*, **9** (2019) 28534-28540.
- [2] N.M. Khalifa, A.M. Srour, S.S. AbdEl-Karim, D.O. Saleh, M. A. Al-Omar, Synthesis and 2D-QSAR study of active benzofuran-based vasodilators, *Molecules*, **22** (2017) 1820.
